# Supplementary material for: Monoclinic 122-Type BaIr2Ge2 with a Channel Framework: A Structural Connection between Clathrate and Layered Compounds
Source: Materials (Basel). 2017 Jul 18;10(7):818. doi: 10.3390/ma10070818 (PMC5551861; doi:10.3390/ma10070818)
Supplement: Supplementary file 1 [file materials-10-00818-s001.zip › BaIr2Ge2-b.cif]

 
data_BaIr2Ge2-b 
  
_audit_creation_method            SHELXL-2013 
_chemical_name_systematic 
; 
 ? 
; 
_chemical_name_common             ? 
_chemical_melting_point           ? 
_chemical_formula_moiety          ? 
_chemical_formula_sum 
 'Ba Ge2 Ir2' 
_chemical_formula_weight          666.92 
  
loop_ 
 _atom_type_symbol 
 _atom_type_description 
 _atom_type_scat_dispersion_real 
 _atom_type_scat_dispersion_imag 
 _atom_type_scat_source 
 'Ge'  'Ge'   0.1547   1.8001 
 'International Tables Vol C Tables 4.2.6.8 and 6.1.1.4' 
 'Ba'  'Ba'  -0.3244   2.2819 
 'International Tables Vol C Tables 4.2.6.8 and 6.1.1.4' 
 'Ir'  'Ir'  -1.4442   7.9887 
 'International Tables Vol C Tables 4.2.6.8 and 6.1.1.4' 
  
_space_group_crystal_system       monoclinic 
_space_group_IT_number            14 
_space_group_name_H-M_alt         'P 21/c' 
_space_group_name_Hall            '-P 2ybc' 
  
_shelx_space_group_comment 
; 
The symmetry employed for this shelxl refinement is uniquely defined 
by the following loop, which should always be used as a source of 
symmetry information in preference to the above space-group names. 
They are only intended as comments. 
; 
  
loop_ 
 _space_group_symop_operation_xyz 
 'x, y, z' 
 '-x, y+1/2, -z+1/2' 
 '-x, -y, -z' 
 'x, -y-1/2, z-1/2' 
  
_cell_length_a                    8.204(5) 
_cell_length_b                    6.625(4) 
_cell_length_c                    7.959(5) 
_cell_angle_alpha                 90 
_cell_angle_beta                  94.274(14) 
_cell_angle_gamma                 90 
_cell_volume                      431.4(4) 
_cell_formula_units_Z             4 
_cell_measurement_temperature     299(2) 
_cell_measurement_reflns_used     474 
_cell_measurement_theta_min       3.96 
_cell_measurement_theta_max       31.92 
  
_exptl_crystal_description        Irregular 
_exptl_crystal_colour             metallic_silver 
_exptl_crystal_density_meas       None 
_exptl_crystal_density_method     'Not measured' 
_exptl_crystal_density_diffrn     10.268 
_exptl_crystal_F_000              1096 
_exptl_transmission_factor_min    ? 
_exptl_transmission_factor_max    ? 
_exptl_crystal_size_max           0.010 
_exptl_crystal_size_mid           0.008 
_exptl_crystal_size_min           0.005 
_exptl_absorpt_coefficient_mu     84.014 
_shelx_estimated_absorpt_T_min    ? 
_shelx_estimated_absorpt_T_max    ? 
_exptl_absorpt_correction_type    Numerical 
_exptl_absorpt_correction_T_min   0.4194 
_exptl_absorpt_correction_T_max   0.7463 
_exptl_absorpt_process_details    'Bruker XPREP' 
  
_exptl_special_details 
; 
 ? 
; 
  
_diffrn_ambient_temperature       299(2) 
_diffrn_radiation_wavelength      0.71073 
_diffrn_radiation_type            MoK\a 
_diffrn_source                    ? 
_diffrn_measurement_device_type   'Bruker APEX-II CCD' 
_diffrn_measurement_method        '\f and \w scans' 
_diffrn_detector_area_resol_mean  ? 
_diffrn_reflns_number             9731 
_diffrn_reflns_av_unetI/netI      0.1281 
_diffrn_reflns_av_R_equivalents   0.0925 
_diffrn_reflns_limit_h_min        -12 
_diffrn_reflns_limit_h_max        12 
_diffrn_reflns_limit_k_min        -9 
_diffrn_reflns_limit_k_max        9 
_diffrn_reflns_limit_l_min        -11 
_diffrn_reflns_limit_l_max        10 
_diffrn_reflns_theta_min          2.489 
_diffrn_reflns_theta_max          32.085 
_diffrn_reflns_theta_full         25.242 
_diffrn_measured_fraction_theta_max   0.984 
_diffrn_measured_fraction_theta_full  0.999 
_diffrn_reflns_Laue_measured_fraction_max    0.984 
_diffrn_reflns_Laue_measured_fraction_full   0.999 
_diffrn_reflns_point_group_measured_fraction_max   0.984 
_diffrn_reflns_point_group_measured_fraction_full  0.999 
_reflns_number_total              1483 
_reflns_number_gt                 955 
_reflns_threshold_expression      'I > 2\s(I)' 
_reflns_Friedel_coverage          0.000 
_reflns_Friedel_fraction_max      . 
_reflns_Friedel_fraction_full     . 
  
_reflns_special_details 
; 
 Reflections were merged by SHELXL according to the crystal 
 class for the calculation of statistics and refinement. 
  
 _reflns_Friedel_fraction is defined as the number of unique 
 Friedel pairs measured divided by the number that would be 
 possible theoretically, ignoring centric projections and 
 systematic absences. 
; 
  
_computing_data_collection        'Bruker APEX2' 
_computing_cell_refinement        'Bruker SAINT' 
_computing_data_reduction         'Bruker SAINT' 
_computing_structure_solution     'SHELXS-97 (Sheldrick 2008)' 
_computing_structure_refinement   'SHELXL-2013 (Sheldrick, 2013)' 
_computing_molecular_graphics     'Bruker SHELXTL' 
_computing_publication_material   'Bruker SHELXTL' 
  
_refine_special_details 
; 
 ? 
; 
_refine_ls_structure_factor_coef  Fsqd 
_refine_ls_matrix_type            full 
_refine_ls_weighting_scheme       calc 
_refine_ls_weighting_details 
'w=1/[\s^2^(Fo^2^)+(0.0232P)^2^] where P=(Fo^2^+2Fc^2^)/3' 
_atom_sites_solution_primary      ? 
_atom_sites_solution_secondary    ? 
_atom_sites_solution_hydrogens    . 
_refine_ls_hydrogen_treatment     undef 
_refine_ls_extinction_method      SHELXL 
_refine_ls_extinction_coef        0.00061(9) 
_refine_ls_extinction_expression 
 'Fc^*^=kFc[1+0.001xFc^2^\l^3^/sin(2\q)]^-1/4^' 
_refine_ls_number_reflns          1483 
_refine_ls_number_parameters      47 
_refine_ls_number_restraints      0 
_refine_ls_R_factor_all           0.1060 
_refine_ls_R_factor_gt            0.0503 
_refine_ls_wR_factor_ref          0.0872 
_refine_ls_wR_factor_gt           0.0755 
_refine_ls_goodness_of_fit_ref    0.954 
_refine_ls_restrained_S_all       0.954 
_refine_ls_shift/su_max           0.000 
_refine_ls_shift/su_mean          0.000 
  
loop_ 
 _atom_site_label 
 _atom_site_type_symbol 
 _atom_site_fract_x 
 _atom_site_fract_y 
 _atom_site_fract_z 
 _atom_site_U_iso_or_equiv 
 _atom_site_adp_type 
 _atom_site_occupancy 
 _atom_site_site_symmetry_order 
 _atom_site_calc_flag 
 _atom_site_refinement_flags_posn 
 _atom_site_refinement_flags_adp 
 _atom_site_refinement_flags_occupancy 
 _atom_site_disorder_assembly 
 _atom_site_disorder_group 
Ba3 Ba 0.23183(14) 0.8818(2) 0.49928(15) 0.0116(3) Uani 1 1 d . . . . . 
Ir1 Ir 0.62595(9) 0.89594(13) 0.10689(10) 0.00738(19) Uani 1 1 d . . . . . 
Ir2 Ir 0.85323(9) 0.66478(12) 0.33342(10) 0.00772(19) Uani 1 1 d . . . . . 
Ge4 Ge 0.5560(2) 0.8515(3) 0.8069(3) 0.0088(4) Uani 1 1 d . . . . . 
Ge5 Ge 0.9282(2) 0.9171(3) 0.1356(3) 0.0091(4) Uani 1 1 d . . . . . 
  
loop_ 
 _atom_site_aniso_label 
 _atom_site_aniso_U_11 
 _atom_site_aniso_U_22 
 _atom_site_aniso_U_33 
 _atom_site_aniso_U_23 
 _atom_site_aniso_U_13 
 _atom_site_aniso_U_12 
Ba3 0.0133(5) 0.0100(6) 0.0112(6) -0.0003(5) -0.0010(4) -0.0002(5) 
Ir1 0.0082(3) 0.0070(4) 0.0069(4) 0.0003(3) 0.0002(2) 0.0006(3) 
Ir2 0.0083(3) 0.0071(4) 0.0076(4) 0.0007(3) -0.0008(3) 0.0003(3) 
Ge4 0.0083(9) 0.0097(12) 0.0082(10) -0.0008(9) -0.0002(7) 0.0012(8) 
Ge5 0.0066(9) 0.0097(11) 0.0108(11) 0.0006(9) -0.0009(7) -0.0003(8) 
  
_geom_special_details 
; 
 All esds (except the esd in the dihedral angle between two l.s. planes) 
 are estimated using the full covariance matrix.  The cell esds are taken 
 into account individually in the estimation of esds in distances, angles 
 and torsion angles; correlations between esds in cell parameters are only 
 used when they are defined by crystal symmetry.  An approximate (isotropic) 
 treatment of cell esds is used for estimating esds involving l.s. planes. 
; 
  
loop_ 
 _geom_bond_atom_site_label_1 
 _geom_bond_atom_site_label_2 
 _geom_bond_distance 
 _geom_bond_site_symmetry_2 
 _geom_bond_publ_flag 
Ba3 Ir2 3.277(2) 2_655 ? 
Ba3 Ir2 3.380(2) 3_676 ? 
Ba3 Ge5 3.421(3) 4_476 ? 
Ba3 Ge4 3.484(3) . ? 
Ba3 Ge5 3.485(3) 2_645 ? 
Ba3 Ge4 3.523(3) 4_575 ? 
Ba3 Ge5 3.538(3) 3_676 ? 
Ba3 Ir1 3.547(2) 2_645 ? 
Ba3 Ge4 3.567(3) 3_676 ? 
Ba3 Ir1 3.579(2) 3_676 ? 
Ba3 Ir2 3.584(2) 1_455 ? 
Ba3 Ge5 3.683(3) 1_455 ? 
Ir1 Ge4 2.377(2) 3_676 ? 
Ir1 Ge4 2.385(2) 4_575 ? 
Ir1 Ge4 2.432(3) 1_554 ? 
Ir1 Ge5 2.477(3) . ? 
Ir1 Ir1 2.9228(19) 3_675 ? 
Ir1 Ir2 2.9278(15) . ? 
Ir1 Ir2 2.9969(17) 4_575 ? 
Ir1 Ba3 3.547(2) 2_655 ? 
Ir1 Ba3 3.579(2) 3_676 ? 
Ir1 Ba3 3.718(2) 2_645 ? 
Ir1 Ba3 3.763(2) 4_575 ? 
Ir2 Ge5 2.408(3) . ? 
Ir2 Ge5 2.429(2) 2_745 ? 
Ir2 Ge4 2.435(3) 4_575 ? 
Ir2 Ge5 2.497(3) 4_576 ? 
Ir2 Ir1 2.9969(17) 4_576 ? 
Ir2 Ba3 3.277(2) 2_645 ? 
Ir2 Ba3 3.380(2) 3_676 ? 
Ir2 Ba3 3.584(2) 1_655 ? 
Ir2 Ba3 3.938(2) 3_666 ? 
Ge4 Ir1 2.377(2) 3_676 ? 
Ge4 Ir1 2.385(2) 4_576 ? 
Ge4 Ir1 2.432(3) 1_556 ? 
Ge4 Ir2 2.435(3) 4_576 ? 
Ge4 Ba3 3.523(3) 4_576 ? 
Ge4 Ba3 3.567(3) 3_676 ? 
Ge4 Ba3 3.833(3) 2_646 ? 
Ge5 Ir2 2.429(2) 2_755 ? 
Ge5 Ir2 2.497(3) 4_575 ? 
Ge5 Ge5 2.762(4) 3_775 ? 
Ge5 Ba3 3.421(3) 4_675 ? 
Ge5 Ba3 3.484(3) 2_655 ? 
Ge5 Ba3 3.538(3) 3_676 ? 
Ge5 Ba3 3.683(3) 1_655 ? 
  
loop_ 
 _geom_angle_atom_site_label_1 
 _geom_angle_atom_site_label_2 
 _geom_angle_atom_site_label_3 
 _geom_angle 
 _geom_angle_site_symmetry_1 
 _geom_angle_site_symmetry_3 
 _geom_angle_publ_flag 
Ir2 Ba3 Ir2 76.83(5) 2_655 3_676 ? 
Ir2 Ba3 Ge5 118.11(6) 2_655 4_476 ? 
Ir2 Ba3 Ge5 102.30(6) 3_676 4_476 ? 
Ir2 Ba3 Ge4 134.93(6) 2_655 . ? 
Ir2 Ba3 Ge4 86.76(5) 3_676 . ? 
Ge5 Ba3 Ge4 106.24(7) 4_476 . ? 
Ir2 Ba3 Ge5 101.76(6) 2_655 2_645 ? 
Ir2 Ba3 Ge5 145.33(6) 3_676 2_645 ? 
Ge5 Ba3 Ge5 47.14(7) 4_476 2_645 ? 
Ge4 Ba3 Ge5 114.58(6) . 2_645 ? 
Ir2 Ba3 Ge4 91.26(6) 2_655 4_575 ? 
Ir2 Ba3 Ge4 138.24(5) 3_676 4_575 ? 
Ge5 Ba3 Ge4 118.35(7) 4_476 4_575 ? 
Ge4 Ba3 Ge4 73.67(6) . 4_575 ? 
Ge5 Ba3 Ge4 75.99(6) 2_645 4_575 ? 
Ir2 Ba3 Ge5 112.26(7) 2_655 3_676 ? 
Ir2 Ba3 Ge5 40.66(4) 3_676 3_676 ? 
Ge5 Ba3 Ge5 68.52(5) 4_476 3_676 ? 
Ge4 Ba3 Ge5 75.82(7) . 3_676 ? 
Ge5 Ba3 Ge5 115.55(7) 2_645 3_676 ? 
Ge4 Ba3 Ge5 149.40(6) 4_575 3_676 ? 
Ir2 Ba3 Ir1 112.37(5) 2_655 2_645 ? 
Ir2 Ba3 Ir1 169.00(4) 3_676 2_645 ? 
Ge5 Ba3 Ir1 79.07(6) 4_476 2_645 ? 
Ge4 Ba3 Ir1 82.40(5) . 2_645 ? 
Ge5 Ba3 Ir1 41.25(5) 2_645 2_645 ? 
Ge4 Ba3 Ir1 39.29(4) 4_575 2_645 ? 
Ge5 Ba3 Ir1 133.33(5) 3_676 2_645 ? 
Ir2 Ba3 Ge4 41.41(5) 2_655 3_676 ? 
Ir2 Ba3 Ge4 87.39(6) 3_676 3_676 ? 
Ge5 Ba3 Ge4 155.13(6) 4_476 3_676 ? 
Ge4 Ba3 Ge4 97.05(7) . 3_676 ? 
Ge5 Ba3 Ge4 114.78(7) 2_645 3_676 ? 
Ge4 Ba3 Ge4 59.85(4) 4_575 3_676 ? 
Ge5 Ba3 Ge4 127.21(7) 3_676 3_676 ? 
Ir1 Ba3 Ge4 95.78(6) 2_645 3_676 ? 
Ir2 Ba3 Ir1 120.55(6) 2_655 3_676 ? 
Ir2 Ba3 Ir1 49.66(3) 3_676 3_676 ? 
Ge5 Ba3 Ir1 99.09(6) 4_476 3_676 ? 
Ge4 Ba3 Ir1 39.31(4) . 3_676 ? 
Ge5 Ba3 Ir1 136.38(5) 2_645 3_676 ? 
Ge4 Ba3 Ir1 110.72(6) 4_575 3_676 ? 
Ge5 Ba3 Ir1 40.74(5) 3_676 3_676 ? 
Ir1 Ba3 Ir1 119.36(4) 2_645 3_676 ? 
Ge4 Ba3 Ir1 104.52(6) 3_676 3_676 ? 
Ir2 Ba3 Ir2 78.78(4) 2_655 1_455 ? 
Ir2 Ba3 Ir2 107.63(4) 3_676 1_455 ? 
Ge5 Ba3 Ir2 41.68(5) 4_476 1_455 ? 
Ge4 Ba3 Ir2 146.20(6) . 1_455 ? 
Ge5 Ba3 Ir2 40.17(4) 2_645 1_455 ? 
Ge4 Ba3 Ir2 108.99(6) 4_575 1_455 ? 
Ge5 Ba3 Ir2 95.11(5) 3_676 1_455 ? 
Ir1 Ba3 Ir2 80.78(4) 2_645 1_455 ? 
Ge4 Ba3 Ir2 113.63(6) 3_676 1_455 ? 
Ir1 Ba3 Ir2 134.80(4) 3_676 1_455 ? 
Ir2 Ba3 Ge5 40.33(4) 2_655 1_455 ? 
Ir2 Ba3 Ge5 96.07(5) 3_676 1_455 ? 
Ge5 Ba3 Ge5 79.65(6) 4_476 1_455 ? 
Ge4 Ba3 Ge5 172.83(6) . 1_455 ? 
Ge5 Ba3 Ge5 66.22(4) 2_645 1_455 ? 
Ge4 Ba3 Ge5 100.04(7) 4_575 1_455 ? 
Ge5 Ba3 Ge5 110.56(6) 3_676 1_455 ? 
Ir1 Ba3 Ge5 94.91(5) 2_645 1_455 ? 
Ge4 Ba3 Ge5 76.56(7) 3_676 1_455 ? 
Ir1 Ba3 Ge5 145.03(6) 3_676 1_455 ? 
Ir2 Ba3 Ge5 38.67(4) 1_455 1_455 ? 
Ge4 Ir1 Ge4 95.94(5) 3_676 4_575 ? 
Ge4 Ir1 Ge4 105.15(7) 3_676 1_554 ? 
Ge4 Ir1 Ge4 121.41(7) 4_575 1_554 ? 
Ge4 Ir1 Ge5 125.40(8) 3_676 . ? 
Ge4 Ir1 Ge5 105.47(8) 4_575 . ? 
Ge4 Ir1 Ge5 105.00(8) 1_554 . ? 
Ge4 Ir1 Ir1 53.43(6) 3_676 3_675 ? 
Ge4 Ir1 Ir1 121.19(7) 4_575 3_675 ? 
Ge4 Ir1 Ir1 51.72(6) 1_554 3_675 ? 
Ge5 Ir1 Ir1 133.35(7) . 3_675 ? 
Ge4 Ir1 Ir2 125.10(7) 3_676 . ? 
Ge4 Ir1 Ir2 53.37(6) 4_575 . ? 
Ge4 Ir1 Ir2 129.37(6) 1_554 . ? 
Ge5 Ir1 Ir2 52.10(6) . . ? 
Ir1 Ir1 Ir2 174.55(5) 3_675 . ? 
Ge4 Ir1 Ir2 137.93(6) 3_676 4_575 ? 
Ge4 Ir1 Ir2 125.89(7) 4_575 4_575 ? 
Ge4 Ir1 Ir2 52.03(6) 1_554 4_575 ? 
Ge5 Ir1 Ir2 53.26(6) . 4_575 ? 
Ir1 Ir1 Ir2 95.27(6) 3_675 4_575 ? 
Ir2 Ir1 Ir2 88.56(5) . 4_575 ? 
Ge4 Ir1 Ba3 69.81(7) 3_676 2_655 ? 
Ge4 Ir1 Ba3 151.96(6) 4_575 2_655 ? 
Ge4 Ir1 Ba3 86.20(6) 1_554 2_655 ? 
Ge5 Ir1 Ba3 68.02(6) . 2_655 ? 
Ir1 Ir1 Ba3 70.38(5) 3_675 2_655 ? 
Ir2 Ir1 Ba3 114.56(4) . 2_655 ? 
Ir2 Ir1 Ba3 73.46(4) 4_575 2_655 ? 
Ge4 Ir1 Ba3 68.18(6) 3_676 3_676 ? 
Ge4 Ir1 Ba3 77.13(7) 4_575 3_676 ? 
Ge4 Ir1 Ba3 161.34(6) 1_554 3_676 ? 
Ge5 Ir1 Ba3 68.73(6) . 3_676 ? 
Ir1 Ir1 Ba3 119.08(5) 3_675 3_676 ? 
Ir2 Ir1 Ba3 61.62(4) . 3_676 ? 
Ir2 Ir1 Ba3 120.76(5) 4_575 3_676 ? 
Ba3 Ir1 Ba3 75.15(4) 2_655 3_676 ? 
Ge4 Ir1 Ba3 157.64(6) 3_676 2_645 ? 
Ge4 Ir1 Ba3 67.49(7) 4_575 2_645 ? 
Ge4 Ir1 Ba3 73.81(6) 1_554 2_645 ? 
Ge5 Ir1 Ba3 75.16(6) . 2_645 ? 
Ir1 Ir1 Ba3 121.34(5) 3_675 2_645 ? 
Ir2 Ir1 Ba3 57.62(4) . 2_645 ? 
Ir2 Ir1 Ba3 59.28(3) 4_575 2_645 ? 
Ba3 Ir1 Ba3 131.51(5) 2_655 2_645 ? 
Ba3 Ir1 Ba3 119.25(4) 3_676 2_645 ? 
Ge4 Ir1 Ba3 82.10(7) 3_676 4_575 ? 
Ge4 Ir1 Ba3 64.55(6) 4_575 4_575 ? 
Ge4 Ir1 Ba3 65.25(6) 1_554 4_575 ? 
Ge5 Ir1 Ba3 152.37(7) . 4_575 ? 
Ir1 Ir1 Ba3 62.60(5) 3_675 4_575 ? 
Ir2 Ir1 Ba3 112.42(5) . 4_575 ? 
Ir2 Ir1 Ba3 109.86(5) 4_575 4_575 ? 
Ba3 Ir1 Ba3 132.98(3) 2_655 4_575 ? 
Ba3 Ir1 Ba3 128.24(3) 3_676 4_575 ? 
Ba3 Ir1 Ba3 77.25(5) 2_645 4_575 ? 
Ge5 Ir2 Ge5 108.22(5) . 2_745 ? 
Ge5 Ir2 Ge4 106.09(8) . 4_575 ? 
Ge5 Ir2 Ge4 134.90(8) 2_745 4_575 ? 
Ge5 Ir2 Ge5 136.39(8) . 4_576 ? 
Ge5 Ir2 Ge5 68.18(8) 2_745 4_576 ? 
Ge4 Ir2 Ge5 104.32(7) 4_575 4_576 ? 
Ge5 Ir2 Ir1 54.28(6) . . ? 
Ge5 Ir2 Ir1 147.91(6) 2_745 . ? 
Ge4 Ir2 Ir1 51.82(6) 4_575 . ? 
Ge5 Ir2 Ir1 143.77(6) 4_576 . ? 
Ge5 Ir2 Ir1 140.47(6) . 4_576 ? 
Ge5 Ir2 Ir1 109.27(7) 2_745 4_576 ? 
Ge4 Ir2 Ir1 51.95(6) 4_575 4_576 ? 
Ge5 Ir2 Ir1 52.65(6) 4_576 4_576 ? 
Ir1 Ir2 Ir1 96.62(5) . 4_576 ? 
Ge5 Ir2 Ba3 85.31(8) . 2_645 ? 
Ge5 Ir2 Ba3 78.87(6) 2_745 2_645 ? 
Ge4 Ir2 Ba3 75.69(6) 4_575 2_645 ? 
Ge5 Ir2 Ba3 132.55(7) 4_576 2_645 ? 
Ir1 Ir2 Ba3 73.39(5) . 2_645 ? 
Ir1 Ir2 Ba3 113.80(5) 4_576 2_645 ? 
Ge5 Ir2 Ba3 73.19(7) . 3_676 ? 
Ge5 Ir2 Ba3 137.11(6) 2_745 3_676 ? 
Ge4 Ir2 Ba3 80.72(6) 4_575 3_676 ? 
Ge5 Ir2 Ba3 81.78(6) 4_576 3_676 ? 
Ir1 Ir2 Ba3 68.72(4) . 3_676 ? 
Ir1 Ir2 Ba3 71.05(4) 4_576 3_676 ? 
Ba3 Ir2 Ba3 142.10(4) 2_645 3_676 ? 
Ge5 Ir2 Ba3 72.88(6) . 1_655 ? 
Ge5 Ir2 Ba3 67.70(7) 2_745 1_655 ? 
Ge4 Ir2 Ba3 152.23(6) 4_575 1_655 ? 
Ge5 Ir2 Ba3 65.67(6) 4_576 1_655 ? 
Ir1 Ir2 Ba3 120.78(5) . 1_655 ? 
Ir1 Ir2 Ba3 110.82(5) 4_576 1_655 ? 
Ba3 Ir2 Ba3 130.81(3) 2_645 1_655 ? 
Ba3 Ir2 Ba3 72.37(4) 3_676 1_655 ? 
Ge5 Ir2 Ba3 156.91(6) . 3_666 ? 
Ge5 Ir2 Ba3 59.52(6) 2_745 3_666 ? 
Ge4 Ir2 Ba3 77.70(6) 4_575 3_666 ? 
Ge5 Ir2 Ba3 60.77(6) 4_576 3_666 ? 
Ir1 Ir2 Ba3 124.64(4) . 3_666 ? 
Ir1 Ir2 Ba3 59.70(3) 4_576 3_666 ? 
Ba3 Ir2 Ba3 73.43(4) 2_645 3_666 ? 
Ba3 Ir2 Ba3 129.57(5) 3_676 3_666 ? 
Ba3 Ir2 Ba3 114.51(3) 1_655 3_666 ? 
Ir1 Ge4 Ir1 149.79(9) 3_676 4_576 ? 
Ir1 Ge4 Ir1 74.85(7) 3_676 1_556 ? 
Ir1 Ge4 Ir1 133.44(10) 4_576 1_556 ? 
Ir1 Ge4 Ir2 130.74(10) 3_676 4_576 ? 
Ir1 Ge4 Ir2 74.81(6) 4_576 4_576 ? 
Ir1 Ge4 Ir2 76.02(7) 1_556 4_576 ? 
Ir1 Ge4 Ba3 72.52(6) 3_676 . ? 
Ir1 Ge4 Ba3 77.27(7) 4_576 . ? 
Ir1 Ge4 Ba3 142.66(8) 1_556 . ? 
Ir2 Ge4 Ba3 140.44(9) 4_576 . ? 
Ir1 Ge4 Ba3 70.90(7) 3_676 4_576 ? 
Ir1 Ge4 Ba3 102.45(8) 4_576 4_576 ? 
Ir1 Ge4 Ba3 75.93(7) 1_556 4_576 ? 
Ir2 Ge4 Ba3 136.59(9) 4_576 4_576 ? 
Ba3 Ge4 Ba3 76.66(6) . 4_576 ? 
Ir1 Ge4 Ba3 101.40(8) 3_676 3_676 ? 
Ir1 Ge4 Ba3 74.37(7) 4_576 3_676 ? 
Ir1 Ge4 Ba3 121.29(8) 1_556 3_676 ? 
Ir2 Ge4 Ba3 62.90(6) 4_576 3_676 ? 
Ba3 Ge4 Ba3 82.95(7) . 3_676 ? 
Ba3 Ge4 Ba3 159.54(6) 4_576 3_676 ? 
Ir1 Ge4 Ba3 136.98(8) 3_676 2_646 ? 
Ir1 Ge4 Ba3 65.54(7) 4_576 2_646 ? 
Ir1 Ge4 Ba3 68.66(6) 1_556 2_646 ? 
Ir2 Ge4 Ba3 60.47(5) 4_576 2_646 ? 
Ba3 Ge4 Ba3 129.02(7) . 2_646 ? 
Ba3 Ge4 Ba3 78.68(6) 4_576 2_646 ? 
Ba3 Ge4 Ba3 116.55(7) 3_676 2_646 ? 
Ir2 Ge5 Ir2 128.69(9) . 2_755 ? 
Ir2 Ge5 Ir1 73.62(6) . . ? 
Ir2 Ge5 Ir1 140.70(10) 2_755 . ? 
Ir2 Ge5 Ir2 114.98(9) . 4_575 ? 
Ir2 Ge5 Ir2 111.82(8) 2_755 4_575 ? 
Ir1 Ge5 Ir2 74.09(6) . 4_575 ? 
Ir2 Ge5 Ge5 158.69(14) . 3_775 ? 
Ir2 Ge5 Ge5 57.07(8) 2_755 3_775 ? 
Ir1 Ge5 Ge5 115.65(12) . 3_775 ? 
Ir2 Ge5 Ge5 54.74(8) 4_575 3_775 ? 
Ir2 Ge5 Ba3 91.89(8) . 4_675 ? 
Ir2 Ge5 Ba3 82.75(7) 2_755 4_675 ? 
Ir1 Ge5 Ba3 133.27(9) . 4_675 ? 
Ir2 Ge5 Ba3 72.65(6) 4_575 4_675 ? 
Ge5 Ge5 Ba3 67.63(9) 3_775 4_675 ? 
Ir2 Ge5 Ba3 134.91(8) . 2_655 ? 
Ir2 Ge5 Ba3 72.13(7) 2_755 2_655 ? 
Ir1 Ge5 Ba3 70.74(6) . 2_655 ? 
Ir2 Ge5 Ba3 80.52(7) 4_575 2_655 ? 
Ge5 Ge5 Ba3 65.23(9) 3_775 2_655 ? 
Ba3 Ge5 Ba3 132.86(7) 4_675 2_655 ? 
Ir2 Ge5 Ba3 66.14(7) . 3_676 ? 
Ir2 Ge5 Ba3 88.77(7) 2_755 3_676 ? 
Ir1 Ge5 Ba3 70.53(6) . 3_676 ? 
Ir2 Ge5 Ba3 142.48(8) 4_575 3_676 ? 
Ge5 Ge5 Ba3 134.29(13) 3_775 3_676 ? 
Ba3 Ge5 Ba3 143.32(7) 4_675 3_676 ? 
Ba3 Ge5 Ba3 76.47(6) 2_655 3_676 ? 
Ir2 Ge5 Ba3 68.45(6) . 1_655 ? 
Ir2 Ge5 Ba3 60.81(5) 2_755 1_655 ? 
Ir1 Ge5 Ba3 133.04(8) . 1_655 ? 
Ir2 Ge5 Ba3 147.86(8) 4_575 1_655 ? 
Ge5 Ge5 Ba3 109.67(10) 3_775 1_655 ? 
Ba3 Ge5 Ba3 75.33(6) 4_675 1_655 ? 
Ba3 Ge5 Ba3 121.03(7) 2_655 1_655 ? 
Ba3 Ge5 Ba3 69.44(6) 3_676 1_655 ? 
  
_refine_diff_density_max    2.812 
_refine_diff_density_min   -2.705 
_refine_diff_density_rms    1.016 
  
_shelxl_version_number 2013-4 
  
_shelx_res_file 
; 
TITL BaIr2Ge2-b in P2(1)/c 
CELL 0.71073   8.20440   6.62490   7.95920  90.0000  94.2743  90.0000 
ZERR    4.00   0.00490   0.00380   0.00470   0.0000   0.0142   0.0000 
LATT  1 
SYMM -X, 0.5+Y, 0.5-Z 
SFAC GE BA IR 
UNIT 8 4 8 
TEMP 26.160 
  
L.S. 10 
ACTA 
  
WGHT    0.023200 
EXTI    0.000608 
FVAR       0.17269 
MOLE   1 
BA3   2    0.231830    0.881799    0.499279    11.00000    0.01334    0.01003 = 
         0.01121   -0.00033   -0.00100   -0.00015 
IR1   3    0.625954    0.895940    0.106885    11.00000    0.00819    0.00703 = 
         0.00686    0.00028    0.00016    0.00059 
IR2   3    0.853228    0.664781    0.333418    11.00000    0.00827    0.00705 = 
         0.00762    0.00071   -0.00078    0.00034 
GE4   1    0.555974    0.851521    0.806854    11.00000    0.00831    0.00968 = 
         0.00817   -0.00080   -0.00018    0.00119 
GE5   1    0.928217    0.917146    0.135562    11.00000    0.00657    0.00969 = 
         0.01077    0.00057   -0.00091   -0.00029 
  
HKLF 4 
  
REM  BaIr2Ge2-b in P2(1)/c 
REM R1 =  0.0503 for     955 Fo > 4sig(Fo)  and  0.1060 for all    1483 data 
REM     47 parameters refined using      0 restraints 
  
END 
  
WGHT      0.0232      0.0000 
  
REM Highest difference peak  2.812,  deepest hole -2.705,  1-sigma level  1.016 
Q1    1   0.9160  0.4981  0.2470  11.00000  0.05    2.81 
Q2    1   0.8595  0.7516  0.2433  11.00000  0.05    2.78 
Q3    1   0.7545  0.6296  0.4403  11.00000  0.05    2.67 
Q4    1   0.9954  0.7649  0.2040  11.00000  0.05    2.61 
Q5    1   0.3563  0.8420  0.3395  11.00000  0.05    2.61 
Q6    1   0.8448  0.5707  0.3918  11.00000  0.05    2.49 
Q7    1   0.1658  0.7442  0.5993  11.00000  0.05    2.48 
Q8    1   0.8214  0.6399  0.1805  11.00000  0.05    2.47 
Q9    1   0.8908  0.5782  0.2767  11.00000  0.05    2.35 
Q10   1   0.5052  0.8522  0.0044  11.00000  0.05    2.34 
Q11   1   0.8706  0.6479  0.4884  11.00000  0.05    2.27 
Q12   1   0.6569  1.0204  0.9235  11.00000  0.05    2.27 
Q13   1   0.1767  0.9792  0.3179  11.00000  0.05    2.24 
Q14   1   0.8432  1.1628  0.1887  11.00000  0.05    2.20 
Q15   1   0.2225  0.9780  0.6236  11.00000  0.05    2.15 
Q16   1   0.7242  0.5170  0.2946  11.00000  0.05    2.12 
Q17   1   0.1522  1.0302  0.4370  11.00000  0.05    2.10 
Q18   1   0.6263  0.8003  0.0282  11.00000  0.05    2.06 
Q19   1   0.2387  0.9963  0.4209  11.00000  0.05    2.04 
Q20   1   0.8962  0.5283  0.3969  11.00000  0.05    2.01 
; 
_shelx_res_checksum   28361 
  
_shelx_hkl_file 
; 
   0   0   1   -0.55    5.75 
   0   0  -1  -27.63   12.29 
   0   0  -1  -35.66   23.73 
   0   0  -1    8.22   11.49 
   0   0   2   23.62   12.87 
   0   0   2    0.50    8.98 
   0   0  -2    9.28   21.22 
   0   0  -2 -124.71   48.12 
   0   0  -3   10.83   25.63 
   0   0  -3 -142.34   49.98 
   0   0  -3   10.35   16.58 
   0   0  -4 1591.39  141.16 
   0   0  -4 1649.22   57.78 
   0   0  -4 1772.64   89.52 
   0   0  -5   34.72   39.32 
   0   0  -5   15.38   21.55 
   0   0  -5   13.97   82.23 
   0   0  -6 2104.05  129.86 
   0   0  -6 1942.06   76.80 
   0   0  -6 1954.49  236.13 
   0   0  -7   20.40  113.28 
   0   0  -7    4.73   29.59 
   0   0  -7  -34.44   56.12 
   0   0  -8  328.28  162.28 
   0   0  -8  446.15  169.12 
   0   0  -8  303.23   98.28 
   0   0  -9  -79.01   88.17 
   0   0  -9   10.24  146.60 
   0   0  -9  112.75  144.21 
   0   0 -10  536.48  202.90 
   0   0 -10  636.38  237.02 
   0   0 -11  -50.62  128.82 
   0   0 -11 -111.89  190.72 
   0   1   0  -29.52   36.85 
   0   1   0   28.23   39.60 
   0   1   0  -20.02   43.38 
   0  -1   0  -14.91   26.14 
   0  -1   0  -15.45   41.18 
   0  -1   0   24.62   28.65 
   0   1  -1 1076.44   79.09 
   0   1  -1 1131.08   61.98 
   0   1  -1 1169.28   78.09 
   0  -1   1  997.05   67.12 
   0  -1  -1 1112.15   48.41 
   0  -1   1 1246.14  108.13 
   0  -1  -1  927.06   59.97 
   0  -1   1 1042.07   63.50 
   0   1  -2   -4.40   57.93 
   0   1  -2   73.38   42.71 
   0   1  -2   90.73   30.54 
   0  -1   2   54.00   30.85 
   0  -1   2   26.19   38.12 
   0   1  -3 6071.76  168.89 
   0   1  -3 6297.49  114.27 
   0   1  -3 6162.03  233.28 
   0  -1   3 5849.57  121.46 
   0  -1   3 6185.25  227.77 
   0   1  -4 2413.03  124.45 
   0   1  -4 2436.38   75.78 
   0   1  -4 2317.59  176.10 
   0  -1  -4 2214.92  149.20 
   0  -1   4 2395.92  163.23 
   0  -1   4 2448.28   73.01 
   0   1  -5  945.92   59.06 
   0   1  -5 1025.16  164.82 
   0   1  -5 1099.41  112.24 
   0  -1  -5  913.21  141.92 
   0  -1   5 1075.17   48.18 
   0  -1  -5  871.33   73.27 
   0   1  -6  894.07   67.77 
   0   1  -6  949.92  117.60 
   0   1  -6 1027.25  176.87 
   0  -1  -6  884.61   93.87 
   0  -1  -6 1058.51  177.18 
   0  -1   6  904.85   39.99 
   0   1  -7  103.10  125.43 
   0   1  -7   70.30   75.43 
   0  -1  -7   70.88  117.19 
   0  -1  -7   -3.16   27.57 
   0  -1  -7    1.19   48.38 
   0  -1  -7   69.39  115.53 
   0   1  -8 1010.67  220.87 
   0   1  -8  556.92  185.97 
   0   1  -8  773.17  144.63 
   0  -1  -8  685.30  173.62 
   0  -1  -8  900.09  127.32 
   0  -1  -8  778.81  191.45 
   0   1  -9  -98.35  105.62 
   0   1  -9   -8.03  168.36 
   0   1  -9   -9.50  126.53 
   0  -1  -9  -16.28   83.48 
   0  -1  -9   34.58  139.59 
   0  -1  -9  -10.20  106.91 
   0   1 -10  610.68  208.72 
   0   1 -10  586.07  242.79 
   0   1 -10  752.25  189.56 
   0  -1 -10  685.64  241.23 
   0  -1 -10  733.74  196.56 
   0   1 -11 -199.03  175.12 
   0   1 -11  296.30  179.44 
   0  -1 -11  -98.55  185.90 
   0  -1 -11   19.36  141.68 
   0   2   0  -10.51   72.17 
   0   2   0   -7.54   64.39 
   0   2   0  -11.81   59.84 
   0  -2   0    9.27   50.71 
   0  -2   0  -36.66   63.86 
   0  -2   0   14.71   42.57 
   0   2   1  124.74   33.20 
   0   2  -1  143.24   56.83 
   0   2  -1  178.99   78.02 
   0   2   1   79.66   50.38 
   0   2  -1  103.95   73.62 
   0  -2   1   52.14   54.40 
   0  -2  -1  144.30   38.74 
   0  -2   1  121.61   69.69 
   0  -2   1   87.19   48.11 
   0  -2  -1  157.64   27.11 
   0   2  -2  364.50   80.80 
   0   2  -2  281.42   83.08 
   0   2  -2  302.73   56.51 
   0  -2  -2  355.30   48.09 
   0  -2   2  288.73   83.58 
   0  -2   2  284.25   65.00 
   0  -2   2  379.44   62.51 
   0  -2  -2  245.27   49.42 
   0   2  -3 2623.29  168.54 
   0   2  -3 2404.12  142.82 
   0   2  -3 2454.90  102.29 
   0  -2   3 2243.09  194.62 
   0  -2  -3 2352.98  106.73 
   0  -2   3 2625.96  117.14 
   0  -2  -3 2396.17  125.34 
   0   2  -4   91.98   69.82 
   0   2  -4   51.35   82.14 
   0   2  -4  157.52   46.41 
   0  -2   4  -10.31   42.04 
   0  -2   4   52.03   35.39 
   0  -2  -4   52.29   65.70 
   0   2  -5  203.98   49.43 
   0   2  -5  141.66   80.34 
   0   2  -5  169.24  104.56 
   0  -2   5   99.68   39.15 
   0  -2  -5   77.83   75.78 
   0  -2   5  111.82   62.51 
   0  -2  -5  -78.36   71.13 
   0   2  -6  319.11  106.59 
   0   2  -6  402.29   64.13 
   0   2  -6  413.78  143.43 
   0  -2   6  294.23  106.04 
   0  -2   6  396.30   52.71 
   0  -2  -6  351.92   64.73 
   0  -2  -6  265.24  107.17 
   0  -2  -6  393.76  123.72 
   0   2  -7 3382.85  296.77 
   0   2  -7 3465.56  234.64 
   0  -2  -7 3481.78  157.59 
   0  -2  -7 3494.96  251.74 
   0  -2   7 3466.12  104.27 
   0  -2  -7 3203.17  259.77 
   0   2  -8  321.57  137.13 
   0   2  -8  225.15  159.38 
   0  -2  -8  469.36  159.83 
   0  -2  -8  238.85   79.32 
   0  -2  -8  372.14  136.23 
   0   2  -9   37.62  140.59 
   0   2  -9  156.48  145.63 
   0   2  -9 -103.48  159.38 
   0  -2  -9   99.33  127.75 
   0  -2  -9  213.60  141.79 
   0   2 -10   31.72  171.65 
   0   2 -10   64.54  202.92 
   0   2 -10  149.38  151.61 
   0  -2 -10  -22.35  162.57 
   0  -2 -10    1.76  117.96 
   0   2 -11  672.00  215.15 
   0   2 -11  912.26  300.19 
   0  -2 -11 1025.33  187.96 
   0  -2 -11  801.74  229.22 
   0  -2 -11  831.04  298.42 
   0   3   0 -131.88   84.30 
   0   3   0  -93.04   59.72 
   0   3   0  -18.01   75.41 
   0  -3   0   73.71   46.07 
   0  -3   0   62.67   74.28 
   0  -3   0   78.44   61.51 
   0   3  -1  585.25  115.82 
   0   3   1  480.76   97.20 
   0   3  -1  571.45  128.09 
   0   3  -1  465.03   88.19 
   0   3   1  491.72   66.43 
   0  -3  -1  437.72   62.41 
   0  -3   1  443.63   70.19 
   0  -3   1  474.25   85.38 
   0  -3  -1  432.33   70.80 
   0  -3  -1  282.18  113.42 
   0  -3   1  406.20  112.71 
   0   3  -2 2098.08  129.71 
   0   3  -2 1935.75  164.77 
   0   3  -2 2043.33  177.29 
   0  -3   2 2089.07  140.24 
   0  -3  -2 1994.22  105.02 
   0  -3   2 2272.53  248.56 
   0  -3   2 2262.71  130.63 
   0  -3  -2 1879.45   74.82 
   0   3  -3 4480.56  236.31 
   0   3  -3 4402.70  230.56 
   0   3  -3 4766.85  168.18 
   0  -3  -3 4697.14  157.92 
   0  -3  -3 4694.17  144.76 
   0  -3   3 4586.65  180.84 
   0  -3   3 4699.03  318.45 
   0   3  -4  176.53   97.77 
   0   3  -4  257.31  111.47 
   0   3  -4  331.25   67.67 
   0  -3   4  283.30   74.08 
   0  -3   4  249.82   93.42 
   0  -3  -4  297.62   71.29 
   0  -3  -4  191.72   59.57 
   0   3  -5 -138.15   85.42 
   0   3  -5 -130.82   81.09 
   0   3  -5   55.87   51.66 
   0  -3  -5  179.68   77.81 
   0  -3   5   49.29   64.56 
   0  -3  -5  -16.03   55.05 
   0  -3   5    4.67   46.46 
   0  -3  -5   -2.93   47.70 
   0   3  -6 1461.94  237.16 
   0   3  -6 1517.11  112.02 
   0   3  -6 1184.76  183.08 
   0  -3  -6 1450.12  179.71 
   0  -3   6 1462.67  223.70 
   0  -3   6 1495.89  120.39 
   0  -3  -6 1279.12  158.72 
   0  -3  -6 1389.03  151.00 
   0   3  -7 -123.73  118.54 
   0   3  -7   59.61  124.87 
   0  -3  -7  153.89  110.58 
   0  -3   7  -46.80   40.92 
   0  -3  -7   77.29   72.88 
   0  -3   7    7.08  102.24 
   0  -3  -7  -16.24   85.48 
   0   3  -8  -24.89  148.04 
   0   3  -8  249.81  175.04 
   0   3  -8  286.05  161.24 
   0  -3  -8  197.36  137.86 
   0  -3  -8    5.53   93.02 
   0  -3  -8  334.27  106.04 
   0  -3   8  275.94   55.45 
   0   3  -9  511.18  197.31 
   0   3  -9  716.57  220.65 
   0   3  -9  602.57  240.81 
   0  -3  -9  687.20  149.89 
   0  -3  -9  689.32  203.22 
   0  -3  -9  745.16  176.64 
   0   3 -10  531.56  194.34 
   0   3 -10  -68.93  208.75 
   0   3 -10 -234.79  174.86 
   0  -3 -10  450.97  165.66 
   0  -3 -10  217.63  114.43 
   0   3 -11   34.19  233.20 
   0   3 -11  478.26  193.89 
   0   3 -11 -221.28  212.05 
   0  -3 -11  327.01  130.97 
   0  -3 -11  228.86  160.06 
   0   4   0 8266.25  271.43 
   0   4   0 8658.13  338.22 
   0   4   0 8498.02  303.56 
   0  -4   0 8629.06  458.13 
   0  -4   0 8699.22  233.35 
   0  -4   0 8653.79  243.98 
   0   4   1 2775.17  132.85 
   0   4  -1 2587.63  221.64 
   0   4  -1 2766.56  197.79 
   0   4   1 2957.47  200.69 
   0   4  -1 2710.34  175.48 
   0  -4  -1 2947.33  311.27 
   0  -4   1 2900.02  148.07 
   0  -4   1 2732.44  154.13 
   0  -4  -1 3008.08  151.28 
   0  -4   1 2875.58  295.41 
   0  -4  -1 2950.38  137.42 
   0   4  -2  182.03  112.19 
   0   4  -2  271.97  112.62 
   0   4   2  105.95   67.70 
   0   4  -2  118.14   74.59 
   0  -4   2  142.76   72.36 
   0  -4   2  134.00  107.44 
   0  -4  -2   97.59   58.12 
   0  -4  -2  164.72  112.82 
   0  -4   2  118.42   63.84 
   0  -4  -2   78.08   48.38 
   0   4  -3  342.84  127.99 
   0   4  -3  359.54   90.91 
   0   4  -3  377.12  128.80 
   0  -4   3  284.69   92.81 
   0  -4  -3  324.98   54.40 
   0  -4   3  406.19   83.28 
   0  -4   3  389.21  152.92 
   0  -4  -3  320.68   71.39 
   0   4  -4  328.67  133.81 
   0   4  -4  526.67  155.40 
   0   4  -4  324.36   88.40 
   0  -4  -4  309.39   64.66 
   0  -4   4  210.60  158.57 
   0  -4   4  368.15   87.94 
   0  -4  -4  270.42   67.74 
   0   4  -5 1141.88  127.42 
   0   4  -5 1025.41  193.08 
   0   4  -5 1285.41  222.03 
   0  -4   5 1319.10  234.54 
   0  -4  -5 1325.27  128.70 
   0  -4  -5 1212.58  131.29 
   0  -4   5 1208.08  134.61 
   0   4  -6  333.30  162.56 
   0   4  -6  776.82  109.87 
   0   4  -6  798.52  190.69 
   0  -4  -6  552.34  103.01 
   0  -4   6  679.86  111.90 
   0  -4   6  775.37  187.90 
   0  -4  -6  812.88  127.99 
   0  -4  -6  588.73  114.58 
   0   4  -7  195.00  160.36 
   0   4  -7   58.72  152.36 
   0  -4  -7   47.13   85.47 
   0  -4  -7   92.47   74.58 
   0  -4   7   69.10   64.93 
   0  -4   7   90.45  139.73 
   0   4  -8  686.97  197.00 
   0   4  -8  276.91  185.68 
   0   4  -8  102.75  182.21 
   0  -4  -8  265.64  120.05 
   0  -4   8  241.13   72.11 
   0  -4  -8  148.49  100.89 
   0   4  -9  -26.42  191.01 
   0   4  -9 -111.01  175.15 
   0   4  -9  211.41  167.50 
   0  -4  -9   51.20   95.69 
   0  -4  -9   23.19  110.36 
   0   4 -10  538.71  277.95 
   0   4 -10  319.15  250.29 
   0   4 -10  525.50  180.51 
   0  -4 -10  534.41  189.11 
   0  -4 -10  477.60  151.40 
   0   5   0  -80.83   90.43 
   0   5   0  -10.89   75.69 
   0  -5   0    9.88   65.44 
   0  -5   0   27.07   50.78 
   0  -5   0  -26.84   81.70 
   0   5  -1    8.91  106.31 
   0   5  -1   29.80  121.57 
   0   5  -1  -18.29   75.34 
   0   5   1   26.62   94.99 
   0   5   1  -23.97   58.86 
   0  -5  -1   76.79   71.92 
   0  -5   1   29.88   66.13 
   0  -5   1  121.15  115.87 
   0  -5   1   58.72   57.67 
   0  -5  -1   86.05   54.14 
   0  -5  -1    7.71   98.30 
   0   5  -2  930.02  207.46 
   0   5  -2 1119.58  203.70 
   0   5  -2 1223.68  151.68 
   0   5   2 1288.96  160.84 
   0  -5  -2 1200.49  131.68 
   0  -5  -2 1186.48  113.24 
   0  -5   2 1154.59  138.35 
   0  -5  -2  906.84  216.61 
   0  -5   2  993.62  112.77 
   0  -5   2 1030.80  229.97 
   0   5  -3  700.97  171.79 
   0   5  -3  707.55  131.38 
   0   5  -3  491.14  158.43 
   0  -5   3  472.08  108.15 
   0  -5  -3  540.84   87.97 
   0  -5  -3  598.30  104.75 
   0  -5   3  563.70  231.30 
   0  -5  -3  497.17  175.45 
   0  -5   3  497.08   95.87 
   0   5  -4  943.15  185.91 
   0   5  -4 1323.37  157.20 
   0   5  -4 1067.39  209.18 
   0  -5   4 1518.84  334.32 
   0  -5  -4 1284.22  138.97 
   0  -5   4 1315.93  147.52 
   0   5  -5 2335.39  182.38 
   0   5  -5 2573.18  305.85 
   0   5  -5 2836.87  302.32 
   0  -5   5 3266.76  424.83 
   0  -5   5 2159.95  190.59 
   0  -5  -5 2408.22  172.01 
   0   5  -6  219.41  157.75 
   0   5  -6  155.15   96.17 
   0   5  -6   37.31  146.34 
   0  -5  -6   65.91   72.85 
   0  -5   6  -48.42   68.09 
   0  -5   6  169.22  179.77 
   0   5  -7  161.87  105.29 
   0   5  -7   77.64  161.47 
   0   5  -7  -20.39  174.65 
   0  -5   7   63.70   82.53 
   0  -5  -7  169.47   90.17 
   0   5  -8  350.65  223.41 
   0   5  -8  490.70  168.82 
   0   5  -8  397.52  211.05 
   0  -5  -8  500.66  132.94 
   0  -5   8  191.81   91.31 
   0   5  -9  646.59  250.18 
   0   5  -9  263.64  237.91 
   0   5  -9  637.82  209.53 
   0  -5  -9  325.82  123.63 
   0   5 -10  955.92  239.72 
   0   5 -10 -196.59  219.03 
   0   5 -10   46.00  242.47 
   0  -5 -10  191.24  135.07 
   0   6   0 -167.59  100.28 
   0   6   0   72.71   85.16 
   0  -6   0    1.58  119.02 
   0  -6   0   22.06   76.00 
   0  -6   0   20.48   53.99 
   0   6  -1 -128.46  109.99 
   0   6   1   65.70   84.36 
   0   6   1   72.88  112.16 
   0   6  -1  -88.50  109.75 
   0  -6  -1   52.00   63.84 
   0  -6   1  -40.38  135.66 
   0  -6   1  -74.54   54.47 
   0  -6  -1   11.68  106.01 
   0  -6   1   34.31   69.70 
   0  -6  -1   45.88   81.04 
   0   6   2  713.65  149.33 
   0   6  -2  715.86  198.44 
   0   6  -2  817.65  188.38 
   0  -6   2  975.22  142.28 
   0  -6   2 1087.18  297.05 
   0  -6  -2  759.00  129.13 
   0  -6  -2  774.87  228.71 
   0  -6  -2  798.04  106.68 
   0  -6   2  750.03  112.33 
   0   6  -3  697.91  168.92 
   0   6  -3  354.96  169.20 
   0   6  -3  465.81  183.91 
   0   6  -3  480.17  126.78 
   0  -6   3  301.51   97.93 
   0  -6   3  576.53  301.59 
   0  -6  -3  527.23  220.67 
   0  -6  -3  507.43   90.00 
   0  -6  -3  561.03  117.70 
   0  -6   3  470.84   98.75 
   0   6  -4  209.37  103.62 
   0   6  -4   51.63  144.15 
   0   6  -4  125.77  147.51 
   0   6  -4  248.06   99.51 
   0  -6   4    4.53  318.03 
   0  -6  -4   75.36  154.60 
   0  -6   4  132.32   82.18 
   0  -6  -4  123.61   95.69 
   0   6  -5  -45.66  135.97 
   0   6  -5   76.48   96.79 
   0   6  -5  353.77  113.10 
   0   6  -5 -215.99  125.72 
   0  -6   5   35.55   77.90 
   0  -6  -5  -56.03   75.97 
   0  -6  -5  302.96  192.61 
   0  -6   5  286.04  328.10 
   0   6  -6 1090.95  249.98 
   0   6  -6 1300.77  189.57 
   0   6  -6  603.27  203.39 
   0  -6   6 1389.62  330.71 
   0  -6  -6 1590.74  343.76 
   0  -6  -6  860.46  155.89 
   0  -6   6 1435.18  172.10 
   0   6  -7  188.08  196.62 
   0   6  -7  774.88  161.28 
   0   6  -7  704.46  248.17 
   0  -6   7  398.59  116.32 
   0  -6  -7  312.32  124.63 
   0   6  -8  498.26  225.25 
   0   6  -8  539.18  265.62 
   0   6  -8 1193.36  215.54 
   0  -6   8 1004.59  150.75 
   0  -6  -8 1596.71  219.99 
   0   7   0   86.15  122.15 
   0  -7   0  -62.95  164.19 
   0  -7   0  -20.88   71.35 
   0  -7   0  -15.09   61.82 
   0   7   1  121.21  119.10 
   0   7  -1  184.59  128.47 
   0  -7   1  -99.93  185.27 
   0  -7  -1   -3.92  149.24 
   0  -7   1   65.31   69.56 
   0  -7  -1   67.33   88.73 
   0  -7   1   75.04   73.33 
   0  -7  -1  114.82   72.53 
   0   7   2 1958.16  231.42 
   0   7  -2 2125.67  257.08 
   0   7  -2 2112.71  276.35 
   0  -7   2 2496.64  175.10 
   0  -7   2 3512.71  506.94 
   0  -7   2 2185.27  178.24 
   0  -7  -2 2110.83  401.85 
   0  -7  -2 2205.13  163.15 
   0  -7  -2 1979.34  190.99 
   0   7  -3  599.77  192.11 
   0   7  -3  357.46  166.68 
   0  -7  -3  425.24  246.91 
   0  -7  -3  464.09  128.00 
   0  -7   3  353.67   97.11 
   0  -7   3  418.55  109.20 
   0  -7  -3  402.05   97.72 
   0  -7   3  466.02  351.30 
   0   7  -4  104.25  146.98 
   0   7  -4  -27.19  164.37 
   0  -7  -4  229.88  222.21 
   0  -7  -4  103.91  113.37 
   0  -7   4 -199.96  363.80 
   0  -7   4   72.53   83.50 
   0   7  -5  306.85  219.57 
   0   7  -5    8.69  161.75 
   0  -7   5  352.16  427.27 
   0  -7  -5  153.63  116.75 
   0  -7  -5  679.79  294.43 
   0  -7   5  242.19   99.49 
   0   7  -6  260.75  227.12 
   0   7  -6  275.51  191.98 
   0  -7   6  171.00   96.91 
   0  -7  -6 1028.46  358.79 
   0   7  -7   56.96  195.73 
   0   7  -7  156.13  233.12 
   0  -7   7  187.78  100.90 
   0   7  -8  228.35  216.22 
   0   8   0  259.09  138.74 
   0  -8   0   92.01  246.77 
   0  -8   0  303.93   91.58 
   0  -8   0  224.59   92.52 
   0   8  -1 1635.49  267.90 
   0   8   1 1375.16  224.84 
   0  -8   1 2181.45  466.11 
   0  -8   1 1751.39  169.47 
   0  -8   1 1842.83  164.41 
   0  -8  -1 1709.72  169.70 
   0  -8  -1 2413.04  478.57 
   0   8  -2  231.96  148.41 
   0  -8  -2  460.79  289.12 
   0  -8   2   77.30  344.46 
   0  -8  -2  205.55   84.69 
   0  -8   2  531.81  114.21 
   0  -8   2  441.18  107.91 
   0   8  -3  324.16  170.48 
   0  -8   3  245.72  101.95 
   0  -8   3  257.36  429.06 
   0  -8  -3  493.52  302.55 
   0   8  -4   77.25  152.05 
   0   8  -4  410.26  209.14 
   0  -8   4   56.40   94.06 
   0  -8   4 -395.23  439.08 
   0  -8  -4  408.36  309.65 
   0   8  -5  761.09  221.25 
   0   8  -5  427.59  237.21 
   0  -8   5  422.12  122.05 
   0  -8  -5 1567.71  459.02 
   0   8  -6  160.68  175.95 
   0   8  -6 -351.69  181.61 
   0  -8  -6  926.47  373.66 
   0  -8   6   62.26   88.83 
   0   9   0  186.48  141.38 
   0  -9   0 -379.93  289.25 
   0  -9   0   36.34   77.05 
   0   9   1  409.86  165.10 
   0   9  -1   48.56  132.31 
   0  -9   1 -596.63  323.82 
   0  -9  -1  130.71   91.06 
   0  -9  -1   80.31  310.68 
   0  -9   1  138.32   89.28 
   0   9  -2  349.84  175.49 
   0  -9  -2  332.57  373.05 
   0  -9   2 -155.47  383.71 
   0  -9   2  217.36  104.92 
   0  -9  -2  277.79  105.90 
   0   9  -3   81.21  165.85 
   0  -9  -3  167.21  328.68 
   0  -9   3   67.78   92.06 
   0  -9   3 -937.15  408.86 
   0   9  -4   75.39  145.89 
   0  -9  -4  879.64  369.20 
   0  -9   4    1.81   89.70 
   1   0 -11  -52.07  153.41 
   1   0 -11 -123.83  222.53 
   1   0 -10 2211.84  317.75 
   1   0 -10 2446.06  391.64 
   1   0  -9 -111.59  115.63 
   1   0  -9  -32.49  162.97 
   1   0  -8  533.08  202.33 
   1   0  -8  519.61  125.62 
   1   0  -8  739.78  199.26 
   1   0  -7 -183.72   93.99 
   1   0  -7  -49.35  126.84 
   1   0  -7   66.30   69.69 
   1   0  -6 3532.74   81.41 
   1   0  -6 3607.33  160.83 
   1   0  -6 3458.34  260.84 
   1   0  -6 3196.84  249.03 
   1   0  -5   15.23   89.56 
   1   0  -5  -55.18   86.03 
   1   0  -5  -53.53   35.68 
  -1   0   5   10.33   13.53 
   1   0  -5   -1.56   15.16 
   1   0  -4 1662.66  151.80 
   1   0  -4 1867.69   46.79 
  -1   0   4 1787.67   51.69 
   1   0  -4 1799.22   91.20 
   1   0  -4 2099.55  198.07 
  -1   0   3    5.47   16.12 
   1   0  -3   -6.54   67.60 
   1   0  -3   68.89   33.73 
   1   0  -3  -29.97   66.55 
   1   0  -2  213.13   85.24 
   1   0  -2   21.68   55.69 
   1   0  -2  216.64   35.68 
  -1   0   2  107.24   39.95 
  -1   0   2   93.92   19.90 
   1   0  -1  -15.81   33.94 
  -1   0   1   -4.64   14.42 
  -1   0   1   -6.83   23.03 
   1   0  -1   19.72   54.22 
  -1   0   1  -18.61   12.96 
   1   0  -1   -7.42   22.61 
   1   0   0  -17.17   27.00 
   1   0   0    5.71   20.87 
  -1   0   0   10.05   15.07 
   1   0   0   11.30   20.93 
  -1   0   0    0.53   11.45 
  -1   0   0    9.37    9.87 
   1   0   1  -26.51   22.78 
  -1   0  -1  -53.30   31.60 
  -1   0  -1   15.96   17.44 
  -1   0  -1   -5.87   10.82 
  -1   0  -2   23.97   19.33 
  -1   0  -2  -10.55   12.53 
  -1   0  -3   14.96   21.54 
  -1   0  -3    7.50   16.95 
  -1   0  -3    7.01   29.10 
  -1   0  -4 1932.21   72.00 
  -1   0  -4 1733.45   95.67 
  -1   0  -4 1781.25   71.94 
  -1   0  -5   15.69   37.57 
  -1   0  -5    5.89   36.69 
  -1   0  -5   33.17   78.14 
  -1   0  -5   18.25   24.33 
  -1   0  -6   31.49   48.56 
  -1   0  -6   70.71   31.46 
  -1   0  -6   47.91   91.50 
  -1   0  -7  -51.34   55.21 
  -1   0  -7  -47.06  104.72 
  -1   0  -7    7.36   33.04 
  -1   0  -8  989.64  142.11 
  -1   0  -8 1098.48  225.62 
  -1   0  -9   11.97  135.35 
  -1   0  -9  -51.19   79.40 
  -1   0 -10   30.86  159.45 
  -1   0 -10 -115.69  103.64 
  -1   0 -10  134.23  133.47 
  -1   0 -11  101.95  173.30 
  -1   0 -11  201.87  153.12 
   1   1 -11  909.62  248.27 
   1   1 -11  500.45  293.77 
   1  -1 -11  442.24  200.98 
   1  -1 -11  420.39  302.27 
   1   1 -10 -258.78  187.08 
   1   1 -10  -25.56  139.04 
   1  -1 -10  -29.35  189.90 
   1  -1 -10  160.37  152.61 
   1   1  -9  597.07  197.48 
   1   1  -9  668.33  247.17 
   1   1  -9  652.24  166.54 
   1  -1  -9  303.03  148.90 
   1  -1  -9  459.19  227.31 
   1   1  -8  122.99  113.88 
   1   1  -8  441.74  204.05 
   1   1  -8   98.69  131.51 
   1  -1  -8  375.85  138.74 
   1  -1  -8  457.18  190.15 
   1  -1  -8  122.46   82.18 
   1   1  -7 1926.81  278.67 
   1   1  -7 2219.30  297.98 
   1   1  -7 2303.87  190.24 
   1  -1  -7 2215.58  275.05 
   1  -1  -7 2083.30   86.65 
  -1  -1   7 2013.89   60.78 
   1  -1  -7 1824.28  129.84 
   1  -1  -7 2060.74  233.28 
   1   1  -6  157.35   83.18 
   1   1  -6  331.21  141.23 
   1   1  -6  351.87  141.04 
   1  -1  -6  248.81   60.95 
  -1  -1   6  260.80   34.76 
   1  -1  -6  161.06   98.43 
   1  -1  -6  317.14  122.24 
   1   1  -5   65.43   63.90 
   1   1  -5  123.52  106.27 
   1   1  -5  -22.33   94.30 
   1  -1  -5    2.31   30.45 
  -1  -1   5   82.69   55.52 
   1  -1  -5  -32.35   65.53 
  -1  -1   5   30.44   22.48 
   1  -1  -5  241.73   96.24 
   1   1  -4 2433.34  195.41 
   1   1  -4 2260.79  193.10 
   1   1  -4 2402.39  135.82 
  -1  -1   4 2448.07   79.86 
   1  -1  -4 2856.27  165.03 
   1  -1  -4 2672.95   89.05 
  -1  -1   4 2639.13  196.13 
   1  -1  -4 3502.04  181.75 
   1   1  -3 1345.22  151.54 
   1   1  -3 1248.28  107.51 
   1   1  -3 1303.47  156.34 
  -1   1   3 1060.00   36.83 
   1  -1  -3 1100.39  100.98 
  -1  -1   3 1107.84  129.75 
  -1  -1   3 1134.61   56.26 
   1  -1  -3 1479.44  128.58 
   1   1  -2 3081.45  149.56 
  -1   1   2 3223.30   69.14 
   1   1  -2 3089.96  145.26 
  -1   1   2 3127.39  118.38 
   1   1  -2 3164.64  182.79 
   1  -1  -2 3272.06  108.89 
   1  -1  -2 3234.46  124.94 
  -1  -1   2 3226.01   85.32 
  -1  -1   2 3342.30  184.32 
   1  -1  -2 3224.49  124.13 
  -1   1   1   39.29   47.76 
   1   1  -1    7.02   70.89 
   1   1  -1  176.31   90.15 
  -1   1   1  141.83   43.12 
   1   1  -1  141.16   49.48 
  -1   1   1  114.50   25.04 
  -1  -1   1  157.95   28.68 
   1  -1  -1  194.93   33.89 
   1  -1  -1  251.47   45.60 
   1  -1  -1  162.40   35.52 
  -1  -1   1  118.75   61.21 
  -1   1   0 1811.52   72.09 
  -1   1   0 1824.68   67.30 
   1   1   0 1766.88   76.15 
  -1   1   0 1802.77   60.31 
   1   1   0 1694.56   93.49 
   1   1   0 1742.72   70.58 
   1  -1   0 1664.37   74.26 
  -1  -1   0 1722.92   61.01 
   1  -1   0 1852.96   92.98 
  -1  -1   0 1768.44  156.32 
  -1   1  -1   86.72   27.63 
  -1   1  -1   72.82   36.23 
  -1   1  -1   98.41   34.80 
   1  -1   1   19.32   54.24 
   1  -1   1  152.05   44.89 
  -1  -1  -1   84.96   23.40 
  -1  -1  -1  -77.58   60.37 
  -1   1  -2  218.00   46.62 
  -1   1  -2  254.21   42.19 
  -1   1  -2  264.79   37.98 
   1  -1   2  234.50   46.36 
   1  -1   2  197.74   56.16 
  -1   1  -3  359.59   41.28 
  -1   1  -3  429.55   64.71 
  -1   1  -3  390.98   52.94 
  -1   1  -3  292.18   84.87 
   1  -1   3  386.83   43.67 
  -1   1  -4 2026.67   78.86 
  -1   1  -4 1739.54  148.01 
  -1   1  -4 1879.69  113.36 
  -1   1  -4 2019.72  106.42 
   1  -1   4 1955.24   65.89 
  -1   1  -5  127.90   56.07 
  -1   1  -5   74.13   56.27 
  -1   1  -5  183.97   97.56 
  -1   1  -5  184.39   40.09 
   1  -1   5  257.37   25.84 
  -1  -1  -5  182.32   48.66 
  -1   1  -6  171.76   70.50 
  -1   1  -6  119.81   43.88 
  -1   1  -6  175.01  112.27 
  -1  -1  -6  177.83   41.35 
  -1  -1  -6  155.91   53.46 
  -1  -1  -6  263.12  100.84 
  -1   1  -7  218.28   87.90 
  -1   1  -7  267.62   59.53 
  -1   1  -7  219.01  140.72 
  -1  -1  -7  186.40   49.69 
  -1  -1  -7  188.90   67.14 
  -1  -1  -7  252.51  124.75 
  -1   1  -8  129.11   90.88 
  -1   1  -8  101.42  133.57 
  -1  -1  -8  194.67  135.33 
  -1  -1  -8  157.71   49.95 
  -1  -1  -8  118.02   70.82 
  -1   1  -9  234.21  147.62 
  -1   1  -9  351.64  129.38 
  -1  -1  -9  391.24  161.66 
  -1  -1  -9  198.73  141.97 
  -1  -1  -9  318.60  103.42 
  -1   1 -10   40.63  127.33 
  -1   1 -10  139.59  173.51 
  -1   1 -10  486.44  178.86 
  -1  -1 -10  338.16  170.16 
  -1  -1 -10  478.47  182.30 
  -1   1 -11  146.90  206.29 
  -1   1 -11  339.41  177.02 
  -1  -1 -11  141.99  180.57 
  -1  -1 -11  218.68  142.46 
   1   2 -11  197.25  193.08 
   1   2 -11  220.80  260.93 
   1  -2 -11  525.36  147.33 
   1  -2 -11  373.36  190.26 
   1   2 -10   42.60  143.10 
   1   2 -10 -252.54  291.13 
   1   2 -10 -105.55  210.95 
   1  -2 -10  176.09  103.32 
   1  -2 -10 -187.31  185.51 
   1  -2 -10  188.24  155.58 
   1   2  -9  198.25  208.03 
   1   2  -9  215.61  169.20 
   1   2  -9  452.10  185.38 
   1  -2  -9  337.83  152.76 
   1  -2  -9  219.26  105.56 
   1  -2  -9  237.26  196.62 
   1   2  -8  159.94  174.13 
   1   2  -8   44.94  125.75 
   1   2  -8 -136.41  119.76 
   1  -2  -8  142.66  116.16 
   1  -2  -8   29.98  144.89 
   1  -2  -8   48.88   74.24 
   1   2  -7  967.02  210.72 
   1   2  -7 1414.38  264.15 
   1   2  -7 1602.06  194.94 
  -1  -2   7 1602.98   85.63 
   1  -2  -7 1378.06  108.89 
   1  -2  -7 1637.87  234.73 
   1  -2  -7 1714.76  212.46 
   1  -2  -7 1488.21  167.29 
   1   2  -6  181.23  108.38 
   1   2  -6  -77.05  112.76 
   1   2  -6  -14.37  121.94 
   1  -2  -6   55.08   38.84 
   1  -2  -6   49.18   59.75 
   1  -2  -6   72.59   83.59 
  -1  -2   6   70.53   69.51 
  -1  -2   6   26.01   34.94 
   1  -2  -6   17.90   90.03 
   1   2  -5  431.34  140.31 
   1   2  -5  403.23  142.77 
   1   2  -5  573.09   61.54 
   1   2  -5  324.54  104.45 
  -1  -2   5  451.09   57.13 
   1  -2  -5  611.21  111.01 
   1  -2  -5  470.37  112.79 
  -1  -2   5  281.84   95.29 
   1  -2  -5  472.65   88.63 
   1   2  -4  285.21   53.51 
   1   2  -4  401.84  129.06 
   1   2  -4  362.04  102.09 
   1   2  -4  293.82  122.77 
   1  -2  -4  300.49   89.17 
   1  -2  -4  335.19   67.65 
  -1  -2   4  204.84   78.03 
  -1  -2   4  315.86   51.86 
   1  -2  -4  527.14   92.10 
   1   2  -3 2423.98  180.35 
   1   2  -3 2138.59  105.79 
   1   2  -3 2038.19  187.56 
   1   2  -3 2192.49  194.12 
   1  -2  -3 2016.92  116.91 
  -1  -2   3 2203.71  214.26 
   1  -2  -3 2043.13  108.92 
   1  -2  -3 2081.55  114.49 
  -1  -2   3 2245.54  102.04 
   1   2  -2  825.80  110.76 
  -1   2   2  610.91   92.63 
   1   2  -2  591.09  125.25 
  -1   2   2  703.98   57.18 
   1   2  -2  674.39  112.57 
  -1  -2   2  610.28   66.13 
  -1  -2   2  662.82  120.71 
   1  -2  -2  560.09   65.56 
   1  -2  -2  850.62   70.10 
   1  -2  -2  703.62   54.26 
   1   2  -1 3796.28  197.74 
   1   2  -1 3791.52  201.16 
   1   2  -1 3530.49  126.29 
  -1   2   1 3752.13  151.32 
  -1   2   1 3564.48  153.20 
  -1   2   1 3783.22  113.84 
  -1  -2   1 3932.44  263.73 
  -1  -2   1 3664.76  126.00 
  -1  -2   1 3859.02  122.38 
   1  -2  -1 3910.47  112.62 
   1  -2  -1 3926.58  137.56 
  -1   2   0  106.37   62.62 
  -1   2   0   53.07   35.57 
   1   2   0  101.96   32.12 
   1   2   0  106.97   61.83 
  -1   2   0   73.04   53.47 
  -1   2   0   82.79   40.86 
   1   2   0   67.11   64.49 
  -1  -2   0   51.06   39.96 
   1  -2   0   26.54   33.50 
   1  -2   0    8.60   57.10 
  -1  -2   0   64.29   40.42 
  -1  -2   0   35.18   71.40 
  -1   2  -1 7914.77  185.67 
  -1   2  -1 8022.65  183.46 
  -1   2  -1 8045.62  204.74 
   1   2   1 7894.10  190.56 
  -1   2  -1 7736.25  197.07 
  -1  -2  -1 7801.04  376.27 
  -1  -2  -1 7784.88  160.99 
   1  -2   1 7476.64  194.32 
   1  -2   1 8088.85  295.87 
  -1  -2  -1 7852.46  144.45 
  -1   2  -2  690.58   80.73 
  -1   2  -2  668.20   67.86 
  -1   2  -2  914.06  107.57 
  -1   2  -2  747.76   87.60 
   1  -2   2  565.38   85.31 
  -1  -2  -2  651.04   49.83 
   1  -2   2  703.40   78.65 
  -1  -2  -2  688.79   47.91 
   1  -2   2  770.85  103.31 
  -1   2  -3  -58.28   56.14 
  -1   2  -3   21.17   51.52 
  -1   2  -3  -10.70   42.89 
  -1   2  -3   56.12   45.97 
   1  -2   3  -24.72   37.10 
   1  -2   3  -39.91   39.58 
  -1   2  -4   11.49   40.77 
  -1   2  -4   26.22   76.90 
  -1   2  -4   28.13   56.45 
  -1   2  -4    7.57   50.20 
   1  -2   4   29.94   37.47 
   1  -2   4    7.24   40.66 
  -1   2  -5  -12.97   58.71 
  -1   2  -5   49.58   45.58 
  -1   2  -5  147.60   99.14 
   1  -2   5   -1.64   32.44 
   1  -2   5    1.43   37.92 
  -1   2  -6   77.10   79.37 
  -1   2  -6   61.69  108.31 
  -1   2  -6  115.43   55.37 
   1  -2   6   78.02   36.37 
  -1   2  -7  276.06  107.76 
  -1   2  -7  304.83  136.41 
  -1   2  -7  234.79   69.81 
  -1  -2  -7  255.61  118.44 
   1  -2   7  324.72   37.61 
  -1  -2  -7  291.41   71.89 
  -1   2  -8  121.61  134.31 
  -1   2  -8  161.36  111.39 
  -1  -2  -8   69.08   61.20 
  -1  -2  -8   49.59   98.26 
  -1  -2  -8   74.50   47.18 
  -1  -2  -8  101.76  111.12 
  -1   2  -9  156.29  140.71 
  -1   2  -9   -4.10  129.77 
  -1  -2  -9   61.48   77.82 
  -1  -2  -9  111.55  141.87 
  -1  -2  -9  182.65  128.69 
  -1   2 -10 -233.35  130.88 
  -1   2 -10  153.12  175.38 
  -1   2 -10  222.61  139.81 
  -1  -2 -10  201.03  136.16 
  -1  -2 -10   95.07  136.93 
  -1   2 -11  144.70  193.04 
  -1   2 -11  608.43  179.32 
  -1   2 -11  245.13  242.13 
  -1  -2 -11  500.60  170.97 
  -1  -2 -11  608.81  200.47 
   1   3 -11  155.84  190.36 
   1   3 -11   16.17  270.59 
   1  -3 -11  551.18  168.12 
   1  -3 -11  312.12  170.37 
   1   3 -10 -137.77  191.96 
   1   3 -10  -77.66  135.65 
   1   3 -10  -80.90  206.24 
   1  -3 -10  -27.10  121.76 
   1  -3 -10   46.86  104.86 
   1   3  -9  192.01  217.82 
   1   3  -9  444.20  194.79 
   1   3  -9  234.61  197.93 
   1  -3  -9  388.43  132.74 
   1  -3  -9  388.20  142.96 
   1   3  -8  642.71  242.28 
   1   3  -8  177.02  151.22 
   1   3  -8  193.89  167.68 
  -1  -3   8  263.31   57.90 
   1  -3  -8  331.36  128.41 
   1  -3  -8  333.79  113.37 
   1  -3  -8  313.18  159.21 
   1   3  -7 1599.41  285.03 
   1   3  -7 1535.00  223.30 
   1   3  -7 1522.13  250.16 
   1  -3  -7 1693.65  185.31 
   1  -3  -7 1528.84  213.36 
  -1  -3   7 2021.56  301.11 
   1  -3  -7 1833.32  199.89 
  -1  -3   7 1723.57  120.19 
   1   3  -6  234.18  149.07 
   1   3  -6  310.99  144.93 
   1   3  -6  114.64  136.74 
   1  -3  -6  240.83   86.52 
   1  -3  -6  282.29   96.95 
  -1  -3   6  199.66  134.59 
   1  -3  -6  208.94  108.36 
  -1  -3   6  203.86   62.51 
   1   3  -5  107.79  129.60 
   1   3  -5  134.68  129.00 
   1   3  -5  280.47   67.38 
   1   3  -5  322.11  133.07 
  -1  -3   5  176.40  106.07 
   1  -3  -5  191.28   88.33 
  -1  -3   5  313.15   70.42 
   1  -3  -5  300.28   82.53 
   1  -3  -5  241.68   77.22 
   1   3  -4 3581.08  258.99 
   1   3  -4 3251.68  228.13 
   1   3  -4 3386.03  154.03 
   1   3  -4 3362.56  226.34 
  -1  -3   4 3414.65  302.01 
   1  -3  -4 3204.42  159.72 
   1  -3  -4 3571.66  159.79 
   1  -3  -4 3293.89  148.53 
  -1  -3   4 3224.25  153.40 
   1   3  -3  458.01  132.94 
   1   3  -3  496.19  121.30 
   1   3  -3  285.68   96.83 
   1   3  -3  349.16   77.53 
  -1  -3   3  322.46   73.84 
   1  -3  -3  457.01   64.42 
  -1  -3   3  287.29  118.34 
   1  -3  -3  541.50   70.93 
   1  -3  -3  334.86   66.41 
   1   3  -2  630.58  138.58 
  -1   3   2  740.62   86.28 
   1   3  -2  856.03  157.78 
   1   3  -2  881.97  110.58 
  -1   3   2  642.73  114.01 
   1  -3  -2  666.11   83.91 
   1  -3  -2  776.92   71.09 
  -1  -3   2  513.59   79.58 
  -1  -3   2  583.96  140.62 
   1   3  -1  421.11  133.52 
  -1   3   1  467.59  109.42 
   1   3  -1  613.08   71.29 
  -1   3   1  590.74  109.61 
   1   3  -1  230.47  112.52 
  -1  -3   1  598.95   78.18 
   1  -3  -1  583.11   57.17 
  -1  -3   1  474.74  128.23 
  -1  -3   1  377.49   70.28 
   1  -3  -1  619.18   90.12 
  -1   3   0  565.68   85.88 
  -1   3   0  100.91   67.13 
  -1   3   0  333.01   66.89 
  -1   3   0  191.80  111.87 
   1   3   0  253.48   99.63 
   1   3   0  172.67   92.13 
  -1  -3   0  228.99  105.39 
   1  -3   0  368.70   67.71 
   1  -3   0  335.53   82.67 
  -1  -3   0  212.16   60.37 
  -1  -3   0  249.52   58.57 
   1  -3   0   51.98   80.19 
   1   3   1  803.96   97.06 
  -1   3  -1  844.62   98.02 
  -1   3  -1 1040.72  111.01 
  -1   3  -1  578.70  119.41 
   1   3   1 1119.49  114.46 
  -1   3  -1  784.48   95.04 
  -1  -3  -1  837.41   74.90 
   1  -3   1  801.94  108.69 
   1  -3   1  688.50  122.52 
   1  -3   1 1159.98  104.44 
  -1  -3  -1  828.55   71.81 
  -1  -3  -1  563.61  139.65 
  -1   3  -2   69.40   57.26 
  -1   3  -2  127.47   65.79 
  -1   3  -2  111.99   80.31 
  -1   3  -2   81.14   56.35 
  -1  -3  -2   41.71   91.10 
   1  -3   2  122.81   56.70 
   1  -3   2   20.58   74.28 
  -1  -3  -2   37.92   35.59 
   1  -3   2   70.06   70.08 
  -1  -3  -2   86.79   35.79 
  -1   3  -3   11.73   64.50 
  -1   3  -3  -16.00   48.92 
  -1   3  -3   18.48   67.36 
   1  -3   3  -14.96   69.59 
  -1  -3  -3  -20.32   27.22 
   1  -3   3  -47.23   44.95 
   1  -3   3  -74.07   53.27 
  -1  -3  -3   23.41   30.57 
  -1   3  -4  850.08  130.55 
  -1   3  -4  994.62   98.44 
  -1   3  -4  921.90  149.84 
   1  -3   4  937.02  104.97 
  -1  -3  -4  925.24   92.62 
   1  -3   4  594.83  102.96 
  -1   3  -5  883.30   99.81 
  -1   3  -5  650.10  148.66 
  -1   3  -5  813.38  133.61 
   1  -3   5  678.03  114.61 
   1  -3   5  825.03  102.64 
  -1  -3  -5  817.72  104.11 
  -1   3  -6 1073.78  109.10 
  -1   3  -6  953.94  155.56 
  -1   3  -6 1101.78  194.86 
   1  -3   6 1025.94  105.53 
  -1  -3  -6 1352.12  145.35 
   1  -3   6 1174.87  183.15 
  -1  -3  -6 1303.51  176.30 
  -1   3  -7  314.67  148.21 
  -1   3  -7  344.82  133.20 
  -1  -3  -7  348.76   94.53 
  -1  -3  -7  412.70  106.72 
  -1  -3  -7  616.78  138.22 
   1  -3   7  243.44   64.38 
  -1   3  -8  150.00  143.12 
  -1   3  -8  171.70  135.54 
  -1  -3  -8  232.39   73.94 
  -1  -3  -8  310.17  117.69 
  -1  -3  -8  312.27  112.93 
  -1  -3  -8  196.43   83.82 
  -1   3  -9  313.35  164.38 
  -1   3  -9  489.65  212.83 
  -1  -3  -9  391.95  137.24 
  -1  -3  -9  684.13  168.68 
  -1  -3  -9  514.68  123.63 
  -1   3 -10 -168.59  168.66 
  -1   3 -10   23.90  191.98 
  -1   3 -10  268.89  143.48 
  -1  -3 -10  -48.50  121.25 
  -1  -3 -10  214.67  112.34 
  -1   3 -11 -145.36  199.26 
  -1   3 -11   64.02  230.43 
  -1   3 -11  421.20  180.26 
  -1  -3 -11  -58.71  116.41 
  -1  -3 -11  280.81  113.23 
   1   4 -10 1018.09  329.82 
   1   4 -10 1026.49  272.09 
   1   4 -10 1171.11  279.09 
   1  -4 -10  980.00  218.81 
   1  -4 -10  972.57  189.82 
   1   4  -9 1145.51  267.33 
   1   4  -9  982.91  296.96 
   1   4  -9 1696.26  298.18 
   1  -4  -9 1265.26  204.40 
   1  -4  -9 1208.69  197.83 
   1   4  -8  140.80  186.65 
   1   4  -8  201.99  141.41 
   1   4  -8  430.01  223.93 
  -1  -4   8  185.85   75.38 
  -1  -4   8  353.77  189.13 
   1  -4  -8  233.34  109.35 
   1  -4  -8  305.23  114.52 
   1   4  -7  218.01  167.54 
   1   4  -7  206.14  140.29 
   1   4  -7   67.13  165.35 
  -1  -4   7  109.42   69.46 
  -1  -4   7  420.95  195.30 
   1  -4  -7  216.65   94.82 
   1  -4  -7  240.29  104.50 
   1   4  -6 1760.54  249.70 
   1   4  -6 1291.17  216.53 
   1   4  -6 1059.57  228.32 
   1  -4  -6 1610.18  168.68 
  -1  -4   6 1315.63  139.17 
   1  -4  -6 1538.15  163.66 
  -1  -4   6 1804.14  303.47 
   1   4  -5 1738.06  227.60 
   1   4  -5 1597.99  148.09 
   1   4  -5 1582.51  248.69 
   1   4  -5 1076.25  188.55 
  -1  -4   5 1609.53  275.38 
  -1  -4   5 1399.90  144.92 
   1  -4  -5 1495.12  153.19 
   1  -4  -5 1644.29  134.00 
   1   4  -4  219.14  143.69 
   1   4  -4  413.09  149.94 
   1   4  -4  245.88  108.53 
   1   4  -4  276.97   88.74 
   1  -4  -4  305.40   69.51 
  -1  -4   4  310.52   87.97 
   1  -4  -4  284.53   57.84 
   1  -4  -4  256.55   74.34 
  -1  -4   4  211.85  172.79 
   1   4  -3  303.37   94.80 
   1   4  -3  194.38  136.51 
   1   4  -3  166.63  117.60 
  -1  -4   3  385.64  165.49 
  -1  -4   3  245.61   81.35 
   1  -4  -3  226.12   55.99 
   1  -4  -3  224.36   69.95 
  -1   4   2   69.66   75.31 
   1   4  -2   50.52  104.22 
   1   4  -2  123.62   58.41 
   1   4  -2  159.06  133.28 
   1  -4  -2   69.73   41.85 
  -1  -4   2   57.70  109.91 
  -1  -4   2    6.11   55.95 
   1  -4  -2  113.02   61.90 
  -1  -4   2  231.58   70.26 
   1   4  -1  280.80   52.62 
   1   4  -1  181.13  119.38 
  -1   4   1  304.41  103.62 
  -1   4   1  170.79   98.32 
   1   4  -1  185.00  115.36 
  -1  -4   1  149.26   63.29 
   1  -4  -1  230.80   39.28 
   1  -4  -1  100.89   98.98 
   1  -4  -1  220.21   66.17 
  -1  -4   1  247.34   64.09 
  -1  -4   1  141.81  108.33 
   1  -4  -1  242.03   79.21 
  -1   4   0  197.64   82.70 
  -1   4   0  243.88   84.84 
   1   4   0  259.41  113.97 
   1   4   0  232.37   96.36 
  -1   4   0  348.75  121.86 
  -1  -4   0  147.36  100.91 
   1  -4   0  137.00   77.05 
   1  -4   0  185.18  101.54 
  -1  -4   0  194.91   55.79 
  -1  -4   0  182.14   63.29 
   1  -4   0  242.98   69.21 
   1   4   1   31.07   68.34 
  -1   4  -1   83.18   94.78 
   1   4   1    0.53   61.86 
  -1   4  -1   15.39   62.23 
  -1   4  -1   94.42   79.65 
  -1  -4  -1   63.45   53.33 
  -1  -4  -1  -10.81   77.52 
   1  -4   1   60.00   74.52 
  -1  -4  -1    0.62   40.76 
   1  -4   1  -33.39   46.93 
   1  -4   1   -3.72   71.83 
  -1   4  -2   13.48   96.13 
  -1   4  -2   12.49   64.71 
  -1   4  -2  135.43   87.10 
   1  -4   2  126.67   61.60 
  -1  -4  -2   54.32   49.05 
  -1  -4  -2  128.65   46.18 
  -1  -4  -2   16.43   90.88 
   1  -4   2   41.36   68.01 
   1  -4   2   94.08   94.69 
  -1   4  -3  333.39  120.68 
  -1   4  -3  377.15  113.80 
  -1   4  -3  547.27   93.84 
   1  -4   3  437.04  103.47 
  -1  -4  -3  363.56   57.76 
   1  -4   3  618.66  158.77 
   1  -4   3  724.45   98.43 
  -1  -4  -3  397.28  154.39 
  -1  -4  -3  478.57   58.24 
  -1  -4  -3  475.12   73.97 
  -1   4  -4 1018.02  173.55 
  -1   4  -4 1086.33  119.67 
  -1   4  -4 1114.92  180.70 
  -1  -4  -4 1074.71   94.47 
   1  -4   4 1133.82  123.20 
  -1  -4  -4  792.27   74.73 
  -1  -4  -4 1146.87  106.42 
   1  -4   4 1036.87  196.83 
  -1   4  -5   91.24  114.82 
  -1   4  -5   79.36   73.26 
  -1   4  -5   86.22  117.65 
   1  -4   5  -26.46   68.87 
  -1  -4  -5  -16.64   61.44 
   1  -4   5   24.81   80.46 
  -1  -4  -5   24.81   48.35 
  -1   4  -6  -70.09   94.92 
  -1   4  -6   81.87   71.73 
  -1   4  -6  122.47  131.16 
  -1  -4  -6   82.12   64.41 
   1  -4   6  102.13   70.53 
  -1  -4  -6   79.29   75.84 
   1  -4   6  123.41  102.74 
  -1   4  -7   65.01  135.20 
  -1   4  -7  371.67  167.12 
  -1  -4  -7  688.08  107.33 
   1  -4   7  367.45   86.21 
  -1  -4  -7  356.32  112.75 
  -1  -4  -7  220.17   92.78 
  -1   4  -8  268.15  192.30 
  -1   4  -8  356.36  182.07 
  -1  -4  -8  785.95  158.40 
   1  -4   8  552.67   92.40 
  -1  -4  -8  483.63  125.09 
  -1   4  -9  584.62  235.11 
  -1   4  -9   76.95  184.36 
  -1  -4  -9  269.69  138.38 
  -1  -4  -9  335.11  124.12 
  -1   4 -10 -226.05  199.73 
  -1   4 -10  376.67  140.39 
  -1   4 -10  -76.96  179.82 
  -1  -4 -10   49.19  103.09 
   1   5 -10  -57.18  240.64 
   1   5 -10    6.60  178.14 
   1   5 -10 -125.84  193.32 
   1  -5 -10   32.08  117.31 
   1   5  -9 -102.24  211.62 
   1   5  -9  257.01  166.39 
   1   5  -9  119.25  201.78 
  -1  -5   9   38.00   73.48 
   1  -5  -9   62.10  107.07 
   1   5  -8  565.38  172.82 
   1   5  -8  654.32  251.34 
   1   5  -8  428.26  219.99 
  -1  -5   8  768.41  132.12 
   1  -5  -8  953.21  174.75 
   1   5  -7  196.76  192.37 
   1   5  -7  102.20  164.87 
   1   5  -7  294.48  135.21 
  -1  -5   7  584.39  219.46 
  -1  -5   7  169.38   85.39 
   1  -5  -7   34.37   81.14 
   1   5  -6  223.29  177.48 
   1   5  -6  331.48  170.87 
   1   5  -6  560.27  155.06 
  -1  -5   6  405.14  111.00 
  -1  -5   6  870.92  284.05 
   1  -5  -6  456.63  113.61 
   1   5  -5  537.14  184.09 
   1   5  -5 1054.52  179.13 
   1   5  -5  745.03  209.57 
  -1  -5   5  805.32  294.34 
   1  -5  -5  581.50  117.00 
  -1  -5   5  712.58  123.55 
   1   5  -4  474.55  162.11 
   1   5  -4  135.20  102.96 
   1   5  -4  316.19  173.00 
  -1  -5   4  306.15   92.18 
   1  -5  -4  295.15   92.17 
  -1  -5   4  387.57  262.67 
   1  -5  -4  195.63   88.38 
   1   5  -3  403.54  155.92 
   1   5  -3  207.84   82.42 
   1   5  -3  357.51  168.46 
   1  -5  -3   77.58   77.15 
   1  -5  -3  270.22   66.48 
  -1  -5   3  257.61   89.09 
  -1  -5   3  176.87  195.98 
   1   5  -2 1571.66  227.94 
   1   5  -2 1336.59  108.26 
   1   5  -2 1738.22  240.50 
  -1   5   2 1214.59  159.79 
  -1  -5   2 1268.78  249.44 
   1  -5  -2 1361.35  256.23 
  -1  -5   2 1817.90  155.72 
   1  -5  -2 1615.60  138.09 
   1  -5  -2 1557.49  151.85 
  -1  -5   2 1655.28  141.22 
   1  -5  -2 1540.89   74.06 
  -1   5   1 2021.53  105.65 
   1   5  -1 1807.23  223.45 
  -1   5   1 2280.03  219.91 
  -1   5   1 2072.44  214.12 
   1   5  -1 2100.53  231.95 
  -1  -5   1 2051.95  138.81 
  -1  -5   1 2345.94  333.83 
   1  -5  -1 1851.38  151.66 
   1  -5  -1 1752.15  269.04 
  -1  -5   1 1932.14  138.37 
   1  -5  -1 1803.25  156.49 
   1   5   0  382.36  114.55 
  -1   5   0  156.37   96.37 
  -1   5   0  269.48   94.42 
  -1   5   0  314.54  135.21 
   1   5   0  224.73  121.53 
   1  -5   0  332.10   93.74 
   1  -5   0  376.61   84.46 
   1  -5   0  175.44  125.98 
  -1  -5   0  314.65   79.50 
  -1  -5   0  270.93  136.45 
  -1  -5   0  304.53   69.53 
  -1   5  -1  105.49   88.71 
  -1   5  -1  112.24  113.78 
   1   5   1   21.15   86.65 
   1   5   1   54.38   75.40 
  -1   5  -1  -59.35  119.11 
   1  -5   1  144.11   65.37 
   1  -5   1   51.12  108.06 
  -1  -5  -1   98.55   69.11 
   1  -5   1  104.86   79.42 
  -1  -5  -1   90.94   50.75 
  -1  -5  -1   69.01  102.34 
  -1   5  -2 -228.07  115.72 
  -1   5  -2  132.49  104.93 
  -1   5  -2  138.22   87.20 
   1  -5   2  -20.81  125.44 
  -1  -5  -2  -62.59   57.35 
  -1  -5  -2   23.84  115.57 
   1  -5   2  108.39   64.73 
   1  -5   2  131.06   84.34 
  -1  -5  -2  -40.90   41.84 
  -1   5  -3  890.66  174.75 
  -1   5  -3 1024.17  180.11 
  -1   5  -3  925.24  136.99 
  -1  -5  -3  959.95  114.18 
   1  -5   3 1060.13  258.64 
  -1  -5  -3  869.70   87.76 
   1  -5   3  981.84  121.61 
  -1  -5  -3  628.31  199.36 
   1  -5   3  981.31  147.17 
  -1   5  -4  330.05   98.02 
  -1   5  -4  761.02  180.54 
  -1   5  -4  320.15  151.73 
   1  -5   4  422.91  242.26 
  -1  -5  -4  481.49  197.90 
  -1  -5  -4  498.61   91.89 
   1  -5   4  578.30   99.29 
  -1   5  -5  -18.47  147.65 
  -1   5  -5   21.49  121.61 
  -1   5  -5   64.89   80.30 
   1  -5   5  135.90  175.03 
  -1  -5  -5   90.21   67.85 
   1  -5   5    1.80   74.80 
  -1  -5  -5  198.60  169.97 
  -1   5  -6   89.58   80.57 
  -1   5  -6   39.65  150.53 
  -1   5  -6 -205.11  110.64 
  -1  -5  -6  352.08  170.08 
   1  -5   6  -90.39   64.42 
  -1  -5  -6   27.12   67.08 
  -1   5  -7  -35.73  153.02 
  -1   5  -7  135.45  153.83 
   1  -5   7   47.37   82.57 
  -1  -5  -7  149.71   84.70 
  -1   5  -8   94.40  166.10 
  -1   5  -8  -34.25  202.07 
  -1  -5  -8   17.66   78.50 
   1  -5   8   89.38   74.36 
   1   6  -9  378.96  209.78 
   1   6  -9   -0.46  254.74 
   1   6  -9  335.08  183.59 
   1  -6  -9  144.82  142.73 
  -1  -6   9  228.04  109.14 
   1   6  -8   40.06  185.41 
   1   6  -8 -278.36  200.56 
   1   6  -8  291.40  139.94 
   1  -6  -8   79.69  110.73 
  -1  -6   8   41.35   81.64 
   1   6  -7  455.94  165.11 
   1   6  -7  222.81  195.15 
   1   6  -7  559.41  257.81 
   1  -6  -7  596.63  146.99 
  -1  -6   7 1468.99  304.64 
  -1  -6   7  621.62  132.93 
   1   6  -6  139.40  190.42 
   1   6  -6  298.43  128.87 
   1   6  -6  102.64  170.01 
  -1  -6   6  538.86  281.60 
  -1  -6   6  -37.90   80.66 
   1  -6  -6  245.83  115.54 
   1   6  -5  160.01  103.58 
   1   6  -5  123.36  149.13 
   1   6  -5   83.53  170.59 
   1  -6  -5  155.90   93.28 
  -1  -6   5  181.32  348.24 
  -1  -6   5   35.33   79.52 
   1   6  -4  533.51  193.85 
   1   6  -4  622.61  212.79 
   1   6  -4  860.51  145.47 
  -1  -6   4  991.31  149.81 
   1  -6  -4  739.37  232.62 
  -1  -6   4 1192.76  411.21 
   1  -6  -4  842.34  120.79 
   1  -6  -4 1043.11  155.58 
   1   6  -3   55.07  151.46 
   1   6  -3  -66.22  115.02 
  -1  -6   3  101.59  255.81 
  -1  -6   3 -134.98   60.60 
   1  -6  -3  181.47   94.87 
   1  -6  -3   18.30   75.90 
   1  -6  -3   19.80  138.19 
   1   6  -2 1932.44  254.38 
   1   6  -2 1280.31  224.18 
  -1   6   2 1582.59  192.52 
   1  -6  -2 1829.35  345.79 
   1  -6  -2 1283.26  160.40 
   1  -6  -2 1749.30  162.15 
  -1  -6   2 1423.01  151.04 
  -1  -6   2 1943.05  167.18 
  -1  -6   2 1705.84  344.00 
   1   6  -1 1005.75  198.48 
   1   6  -1  586.28  155.75 
  -1   6   1  508.10  155.30 
   1  -6  -1  617.27  211.52 
  -1  -6   1  707.45  221.25 
  -1  -6   1  683.36  100.73 
   1  -6  -1  583.65   99.98 
  -1  -6   1  553.04   96.25 
   1  -6  -1  664.98  129.94 
  -1   6   0  159.83   84.22 
  -1   6   0   19.32  115.38 
   1   6   0   34.45   96.24 
  -1   6   0  258.83  118.66 
   1   6   0  168.51  127.51 
  -1  -6   0  316.47   74.77 
   1  -6   0  120.11   70.30 
   1  -6   0  228.88  161.80 
   1  -6   0  184.60   95.01 
  -1  -6   0  213.57  149.35 
  -1  -6   0  209.41   80.12 
   1   6   1 1165.89  158.25 
   1   6   1 1251.71  196.49 
  -1   6  -1 1337.87  181.80 
  -1   6  -1 1070.41  211.70 
  -1   6  -1 1065.11  179.15 
  -1  -6  -1 1150.46  245.57 
  -1  -6  -1 1016.26  121.80 
   1  -6   1 1193.33  134.82 
  -1  -6  -1 1000.01  112.51 
   1  -6   1 1191.32  150.61 
   1  -6   1 1636.76  319.47 
  -1   6  -2 1720.33  198.68 
  -1   6  -2 1135.30  218.81 
  -1   6  -2 1655.62  224.79 
   1  -6   2 1963.97  349.94 
   1  -6   2 1473.68  145.46 
  -1  -6  -2 1422.39  148.76 
  -1  -6  -2 1548.50  291.63 
  -1  -6  -2 1370.44  123.67 
   1  -6   2 1504.59  169.73 
  -1   6  -3  380.39  113.70 
  -1   6  -3  450.10  160.57 
  -1   6  -3  422.83  163.17 
  -1  -6  -3  369.43  102.54 
   1  -6   3  614.58  297.66 
   1  -6   3  577.26  105.70 
  -1  -6  -3  535.18   84.44 
   1  -6   3  465.70  119.74 
  -1  -6  -3  689.56  238.88 
  -1   6  -4  -59.17  129.08 
  -1   6  -4   85.37   87.33 
  -1   6  -4    4.96  123.02 
  -1  -6  -4    0.32   77.24 
   1  -6   4 -137.70  285.88 
   1  -6   4  -64.03   58.19 
  -1  -6  -4    2.98  138.34 
  -1   6  -5    8.10   80.69 
  -1   6  -5 -103.13  130.18 
  -1   6  -5  -20.04  157.51 
  -1  -6  -5    0.90   81.94 
   1  -6   5   62.04  292.07 
   1  -6   5   29.51   71.44 
  -1  -6  -5  277.29  201.39 
  -1   6  -6   -6.58  174.04 
  -1   6  -6   50.31  162.06 
  -1   6  -6    1.76   90.04 
   1  -6   6  -42.77   68.56 
  -1  -6  -6  174.51  108.04 
  -1  -6  -6  526.86  257.02 
  -1   6  -7   -5.48  192.03 
  -1   6  -7  -23.71  173.34 
   1  -6   7   57.89   82.94 
   1   7  -8  234.69  278.57 
   1   7  -8  444.45  212.94 
   1  -7  -8  487.27  227.79 
  -1  -7   8  625.18  143.02 
   1   7  -7   90.69  236.92 
   1   7  -7  -55.94  166.60 
   1   7  -6  726.28  263.67 
   1   7  -6  443.96  197.45 
   1  -7  -6  615.67  162.63 
  -1  -7   6 1440.50  403.30 
  -1  -7   6  548.04  131.84 
   1   7  -5  329.08  221.29 
   1   7  -5  350.10  178.74 
  -1  -7   5   46.93   83.43 
  -1  -7   5  869.92  469.34 
   1  -7  -5  737.04  272.55 
   1  -7  -5  312.33  138.38 
   1   7  -4 1454.98  268.09 
   1   7  -4  701.96  193.51 
  -1  -7   4 1976.71  519.27 
  -1  -7   4 1377.40  171.57 
   1  -7  -4 1712.17  398.91 
   1  -7  -4 1365.04  194.01 
   1   7  -3   -9.63  141.02 
   1   7  -3  -12.06  127.54 
  -1  -7   3 -264.53  307.39 
   1  -7  -3 -104.36   99.30 
  -1  -7   3   55.51   76.53 
   1  -7  -3  -41.81   72.87 
   1  -7  -3  158.87  201.12 
   1   7  -2  172.09  129.01 
   1   7  -2  -70.97  110.40 
  -1   7   2   49.96   95.94 
   1  -7  -2    2.68  171.28 
   1  -7  -2   -4.45   96.91 
  -1  -7   2  -42.95   60.05 
  -1  -7   2    5.76   72.93 
  -1  -7   2  -46.97  246.95 
   1  -7  -2  -21.81   68.01 
   1   7  -1  402.49  155.89 
  -1   7   1  104.37  115.71 
   1   7  -1  328.36  126.24 
   1  -7  -1  363.41  109.57 
   1  -7  -1  162.57  189.48 
  -1  -7   1  352.32   88.06 
  -1  -7   1   87.93  224.44 
   1  -7  -1  137.49   81.26 
  -1  -7   1  242.73   81.60 
   1   7   0  236.64  139.56 
  -1   7   0  138.09  132.48 
  -1  -7   0   88.32   67.35 
   1  -7   0   66.42   87.83 
  -1  -7   0  104.74   70.32 
   1  -7   0   99.55   75.02 
   1  -7   0   41.74  188.45 
  -1  -7   0  144.55  174.45 
   1   7   1  313.58  135.52 
  -1   7  -1  292.00  140.72 
   1  -7   1  371.79   96.75 
  -1  -7  -1  451.64   87.89 
   1  -7   1  479.65  255.20 
   1  -7   1  496.33  114.11 
  -1  -7  -1  506.01  134.27 
  -1  -7  -1  411.17  215.45 
  -1   7  -2   23.43  131.93 
  -1   7  -2   51.73   96.32 
  -1   7  -2 -114.11  157.34 
  -1  -7  -2  -50.20  132.93 
   1  -7   2 -205.38  240.43 
   1  -7   2   77.92   74.12 
  -1  -7  -2  -51.67   55.79 
   1  -7   2   47.32   71.80 
  -1   7  -3   43.72   91.03 
  -1   7  -3   67.03  148.41 
  -1   7  -3  -69.15  149.18 
   1  -7   3   46.83   70.37 
   1  -7   3  120.57   78.29 
  -1  -7  -3  115.69  172.51 
   1  -7   3 -479.26  281.67 
  -1   7  -4 -350.32  145.29 
  -1   7  -4  257.29  169.01 
  -1   7  -4   82.08  102.29 
  -1  -7  -4  -69.32  197.05 
   1  -7   4  -64.27  372.57 
   1  -7   4   64.45   74.45 
  -1   7  -5   89.37  187.66 
  -1   7  -5  -67.15  168.54 
  -1   7  -5  328.32  123.70 
  -1  -7  -5  -66.43  231.13 
   1  -7   5   31.38   74.84 
  -1   7  -6 1259.30  283.50 
  -1   7  -6  785.14  235.63 
   1  -7   6 1829.88  193.21 
  -1  -7  -6 2680.87  556.63 
  -1   7  -7 -211.53  185.08 
  -1   7  -7 -258.59  185.28 
   1  -7   7   42.72   83.39 
   1   8  -6   81.30  171.66 
   1   8  -5 1045.23  239.12 
   1   8  -5  863.58  260.87 
  -1  -8   5  879.73  154.76 
  -1  -8   5  855.05  535.41 
   1   8  -4  163.43  158.79 
   1   8  -4   72.30  164.93 
  -1  -8   4  354.31  122.16 
  -1  -8   4  175.85  478.31 
   1  -8  -4  181.30  142.82 
   1  -8  -4  568.73  330.92 
   1   8  -3  -55.76  125.69 
   1   8  -3  301.36  162.68 
  -1  -8   3  -90.42  390.63 
  -1  -8   3   87.17   87.63 
   1  -8  -3  -38.29  115.72 
   1  -8  -3  176.15   95.51 
   1  -8  -3  154.63  271.66 
  -1   8   2  134.68  115.17 
   1   8  -2  299.46  156.67 
   1  -8  -2   60.76  100.50 
  -1  -8   2  -91.19   70.18 
  -1  -8   2 -169.17  307.84 
   1  -8  -2  115.20  236.37 
   1  -8  -2   -2.63   86.13 
  -1   8   1   -2.07  112.07 
   1   8  -1  246.37  138.95 
  -1  -8   1  -12.88  272.38 
  -1  -8   1   47.60   69.24 
   1  -8  -1   92.60   81.68 
   1  -8  -1  254.47  244.07 
   1  -8  -1  113.06   99.76 
  -1   8   0  393.06  154.53 
   1   8   0  291.91  153.89 
  -1  -8   0  409.04   96.75 
   1  -8   0  391.06  112.32 
   1  -8   0  218.86   95.40 
  -1  -8   0  353.28  300.86 
   1  -8   0  208.72  283.69 
   1   8   1   42.51  124.07 
  -1   8  -1  201.56  158.01 
  -1  -8  -1  151.70   82.16 
   1  -8   1   27.13  265.25 
   1  -8   1   49.06   75.57 
   1  -8   1  190.66   92.55 
  -1  -8  -1 -175.67  199.95 
  -1   8  -2  153.62  146.47 
  -1  -8  -2  329.74  286.77 
   1  -8   2  194.30  322.35 
   1  -8   2  397.71  115.31 
   1  -8   2  146.79   86.55 
  -1  -8  -2  378.16   93.61 
  -1   8  -3  320.41  170.96 
   1  -8   3 -102.75  389.71 
   1  -8   3  414.31  115.42 
  -1  -8  -3  374.06  282.74 
   1  -8   3  381.41  103.06 
  -1   8  -4  262.70  188.67 
  -1  -8  -4  261.91  302.33 
   1  -8   4  133.21   89.20 
  -1   8  -5  -38.90  177.01 
  -1   8  -5 -230.22  234.20 
   1  -8   5   73.07   87.14 
  -1  -8  -5  466.58  327.64 
  -1   8  -6  389.82  207.14 
  -1   8  -6 -362.62  190.11 
   1  -8   6   54.87   89.56 
  -1  -8  -6  967.43  344.52 
   1   9  -4  229.42  174.49 
  -1  -9   4 -277.60  473.51 
  -1  -9   4  -60.01   87.50 
   1   9  -3   21.61  147.12 
  -1  -9   3    3.92   95.04 
  -1  -9   3 -676.17  430.25 
   1  -9  -3  298.57  281.11 
   1   9  -2  216.60  157.12 
  -1  -9   2 -559.02  391.21 
   1  -9  -2   38.32   93.64 
   1  -9  -2  103.42  302.08 
  -1  -9   2  -25.87   89.28 
   1   9  -1 1402.42  260.48 
  -1   9   1  965.85  190.55 
  -1  -9   1 1561.74  178.44 
   1  -9  -1 1515.59  434.62 
   1  -9  -1 1877.31  197.23 
  -1  -9   1 1456.38  488.81 
   1   9   0  107.78  131.50 
  -1   9   0  247.12  160.29 
   1  -9   0  325.67  327.38 
   1  -9   0   51.61   90.60 
  -1  -9   0 -223.87  341.50 
  -1  -9   0  200.79   91.16 
  -1   9  -1   29.91  125.47 
   1  -9   1  -36.76   67.08 
   1  -9   1 -533.63  314.90 
  -1  -9  -1  102.75   83.27 
  -1  -9  -1  111.26  341.79 
  -1   9  -2  163.46  170.12 
   1  -9   2  208.07  104.80 
   1  -9   2   80.61   88.18 
  -1  -9  -2 -273.16  282.74 
  -1   9  -3  676.08  204.88 
  -1  -9  -3  626.98  423.24 
   1  -9   3  326.21  113.84 
   1  -9   3  234.61  102.43 
  -1   9  -4  176.50  170.33 
  -1  -9  -4  272.07  365.86 
   1  -9   4  -45.69   82.58 
   2   0 -11  -99.57  145.73 
   2   0 -11  243.93  282.91 
   2   0 -10  175.47  259.44 
   2   0 -10  104.20  165.35 
   2   0  -9 -120.13  135.15 
   2   0  -9 -125.65  203.59 
   2   0  -8 -295.37  156.70 
   2   0  -8  125.04  144.94 
   2   0  -7  -85.28   95.94 
   2   0  -7 -176.46  140.74 
   2   0  -7  -54.06   86.54 
   2   0  -6 1967.75  228.83 
  -2   0   6 1865.67   63.54 
   2   0  -6 1618.32  247.25 
   2   0  -6 1744.64  140.48 
   2   0  -5   11.53   80.23 
   2   0  -5  -16.59  116.57 
   2   0  -5   10.19   59.12 
  -2   0   5    2.59   23.46 
  -2   0   4  527.90   97.46 
   2   0  -4  784.96   87.67 
   2   0  -4  797.72  120.28 
  -2   0   4  786.24   47.82 
   2   0  -4  799.25  162.73 
   2   0  -3   94.69   64.91 
  -2   0   3    7.65   36.63 
   2   0  -3  -19.83   91.59 
  -2   0   3    7.75   20.89 
   2   0  -3   45.40   54.12 
   2   0  -2  576.71   47.77 
   2   0  -2  633.38   91.16 
   2   0  -2  611.69   64.24 
  -2   0   2  409.14   72.79 
   2   0  -2  641.35  119.92 
  -2   0   2  647.70   43.35 
  -2   0   2  585.62   43.42 
   2   0  -1  -41.22   48.38 
  -2   0   1  -19.39   18.52 
   2   0  -1  -69.07   52.05 
   2   0  -1  -42.53   23.41 
  -2   0   1  -28.18   30.71 
  -2   0   1   13.82   21.86 
   2   0   0  330.61   55.51 
  -2   0   0  246.02   49.73 
  -2   0   0  486.01   40.23 
  -2   0   0  407.52   35.12 
   2   0   0  462.03   74.64 
   2   0   0  480.10   61.50 
   2   0   1 -102.63   36.40 
   2   0   1  -26.03   47.23 
  -2   0  -1   34.63   35.16 
  -2   0  -1    5.98   17.50 
  -2   0  -1   -7.72   24.23 
   2   0   2 8424.89  153.74 
  -2   0  -2 8423.23  160.46 
  -2   0  -2 8579.33  131.21 
  -2   0  -2 8309.14  267.98 
  -2   0  -3    8.78   16.48 
  -2   0  -3    6.99   22.80 
  -2   0  -4  632.83   79.31 
  -2   0  -4  581.53   58.88 
  -2   0  -4  566.98   44.03 
  -2   0  -5   -1.11   27.41 
  -2   0  -5  -36.22   21.50 
  -2   0  -5   15.02   42.71 
  -2   0  -6   43.77   36.23 
  -2   0  -6    8.74   49.13 
  -2   0  -6   17.09   44.85 
  -2   0  -7  -57.98   96.02 
  -2   0  -7   20.92   58.39 
  -2   0  -7  -42.74   32.98 
  -2   0  -8   77.12  107.30 
  -2   0  -8   82.74   51.51 
  -2   0  -8  199.23   85.08 
  -2   0  -9  -34.99   70.26 
  -2   0  -9  -76.90  111.97 
  -2   0 -10 -152.40  129.61 
  -2   0 -10   87.44  107.07 
  -2   0 -11  -87.86  116.66 
  -2   0 -11  325.51  154.58 
  -2   0 -11 -123.08  157.69 
   2   1 -11   55.69  172.85 
   2   1 -11 -300.47  256.51 
   2  -1 -11  129.28  107.47 
   2  -1 -11  115.37  158.06 
   2  -1 -11 -262.61  241.65 
   2   1 -10  782.47  251.18 
   2   1 -10  806.76  325.51 
   2  -1 -10  723.84  208.73 
   2  -1 -10  950.94  173.01 
   2  -1 -10  641.19  280.89 
   2   1  -9  -96.13  129.69 
   2   1  -9 -144.80  180.30 
   2  -1  -9  -93.29  201.18 
   2  -1  -9   78.47  135.66 
   2   1  -8 -124.92  124.55 
   2   1  -8  -63.28  175.80 
   2   1  -8    6.19  124.75 
   2  -1  -8 -144.20  158.55 
   2  -1  -8   -3.34  109.15 
   2   1  -7 -150.57  103.31 
   2   1  -7  -54.04  160.40 
   2   1  -7   61.28  114.27 
   2  -1  -7   69.18  156.66 
   2  -1  -7   63.06   97.42 
  -2  -1   7  -27.92   25.93 
   2  -1  -7 -221.80   91.18 
   2   1  -6  546.27  189.57 
   2   1  -6  553.90  122.85 
   2   1  -6  399.22  148.98 
   2  -1  -6  665.95   82.03 
  -2  -1   6  460.99  132.66 
  -2  -1   6  700.40   58.26 
   2  -1  -6  821.40  190.24 
   2  -1  -6  611.14  141.97 
   2   1  -5  -49.13   87.67 
   2   1  -5  130.02   89.00 
  -2   1   5   19.47   20.29 
   2   1  -5  -66.83  117.20 
   2  -1  -5  -14.84   69.90 
  -2  -1   5    4.97   51.85 
  -2  -1   5   29.60   27.20 
   2  -1  -5   89.85  108.01 
   2  -1  -5   47.18   38.77 
   2   1  -4   62.11  116.15 
   2   1  -4  -53.67   73.87 
  -2   1   4   16.24   21.65 
   2   1  -4   84.26   81.75 
  -2  -1   4   21.46   50.64 
   2  -1  -4  -23.37   59.80 
   2  -1  -4    0.87   29.33 
   2  -1  -4   41.16  101.25 
  -2  -1   4    3.88   24.75 
   2  -1  -4  -26.39   38.68 
   2   1  -3 1563.01  151.08 
  -2   1   3 1447.46   58.93 
  -2   1   3 1295.98   97.23 
   2   1  -3 1637.12  192.26 
   2   1  -3 1864.39  153.95 
  -2  -1   3 1504.93   69.02 
  -2  -1   3 1410.74  163.81 
   2  -1  -3 1460.76   94.05 
   2  -1  -3 1606.00  122.40 
   2  -1  -3 1655.74  142.97 
  -2   1   2  254.79   55.64 
   2   1  -2  324.72   76.69 
   2   1  -2  299.69  119.06 
  -2   1   2  222.29   30.59 
   2   1  -2  262.12   75.21 
   2  -1  -2  275.29   64.64 
   2  -1  -2  249.08   46.87 
  -2  -1   2  239.34   36.46 
   2  -1  -2  314.69   76.96 
  -2  -1   2  190.50   67.93 
   2   1  -1 2858.50  166.10 
  -2   1   1 3053.06   82.08 
  -2   1   1 2919.10   69.22 
   2   1  -1 2810.95  123.29 
   2   1  -1 2930.74  106.55 
  -2   1   1 2825.19   97.57 
   2  -1  -1 2837.16   93.35 
   2  -1  -1 2942.54  125.51 
  -2  -1   1 3009.49  207.00 
   2  -1  -1 2770.06  113.60 
   2   1   0   30.50   24.02 
   2   1   0   -0.27   52.52 
  -2   1   0    5.66   33.76 
  -2   1   0   48.01   27.59 
   2   1   0  -19.00   49.72 
  -2   1   0   20.42   23.07 
   2  -1   0  110.38   61.96 
  -2  -1   0   -3.63   22.48 
  -2  -1   0   56.33   60.31 
   2  -1   0  -42.11   51.50 
  -2   1  -1   23.22   31.34 
  -2   1  -1   31.71   25.72 
  -2   1  -1  -13.02   31.04 
   2   1   1  -22.09   48.26 
  -2  -1  -1   -4.24   18.66 
   2  -1   1  -11.14   58.27 
   2  -1   1   63.49   52.79 
  -2  -1  -1   -3.35   57.69 
  -2   1  -2  857.04   74.36 
  -2   1  -2  916.76   58.24 
  -2   1  -2  870.87   60.55 
   2  -1   2  993.03   80.61 
  -2  -1  -2  754.58  129.57 
  -2  -1  -2  825.47   36.57 
   2  -1   2  950.30  102.92 
  -2   1  -3  193.59   41.65 
  -2   1  -3  214.29   39.35 
  -2   1  -3  202.86   52.41 
  -2  -1  -3  236.21   18.73 
   2  -1   3  166.61   45.28 
  -2   1  -4   56.92   36.19 
  -2   1  -4  109.09   52.01 
  -2   1  -4   56.40   34.99 
   2  -1   4   79.17   29.94 
  -2   1  -5  811.48   83.11 
  -2   1  -5  824.35  105.20 
  -2   1  -5  787.59   73.38 
   2  -1   5  749.33   44.43 
  -2  -1  -5  833.76   77.51 
  -2  -1  -5  769.81   47.93 
  -2   1  -6 1464.11  124.77 
  -2   1  -6 1793.12  227.13 
  -2   1  -6 1740.94  141.16 
  -2   1  -6 1749.18   99.70 
  -2  -1  -6 1752.38   96.53 
  -2  -1  -6 1535.70  118.15 
  -2   1  -7  826.34  178.51 
  -2   1  -7  649.55  120.57 
  -2   1  -7  610.63   80.57 
  -2  -1  -7  643.90  150.40 
  -2  -1  -7  638.32  101.91 
  -2  -1  -7  614.28   77.05 
  -2   1  -8  554.56   97.53 
  -2   1  -8  388.56  165.09 
  -2   1  -8  599.94  127.44 
  -2  -1  -8  459.50  144.93 
  -2  -1  -8  655.38   86.03 
  -2  -1  -8  486.76  106.98 
  -2   1  -9  460.79  187.52 
  -2   1  -9  527.06  142.01 
  -2  -1  -9  311.26  155.24 
  -2  -1  -9  385.99  109.31 
  -2   1 -10  733.50  219.60 
  -2   1 -10  766.77  173.13 
  -2  -1 -10  957.62  202.43 
  -2  -1 -10  583.71  140.92 
  -2  -1 -10  579.73  193.25 
  -2   1 -11 -151.97  134.75 
  -2   1 -11  262.70  120.81 
  -2   1 -11   13.34  162.20 
  -2  -1 -11    2.98  129.90 
  -2  -1 -11  265.81  148.58 
   2   2 -11  239.31  201.06 
   2   2 -11 -180.30  266.02 
   2  -2 -11  284.53  124.57 
   2  -2 -11  278.95  168.66 
   2   2 -10  170.67  204.43 
   2   2 -10  -70.78  240.66 
   2  -2 -10   85.88  148.27 
   2  -2 -10   82.89  106.09 
   2   2  -9  351.93  187.27 
   2   2  -9  688.11  223.91 
   2   2  -9  604.81  266.79 
   2  -2  -9  807.27  186.41 
   2  -2  -9  558.21  250.01 
   2  -2  -9  838.52  162.32 
   2   2  -8  130.72  154.43 
   2   2  -8  340.19  217.56 
   2   2  -8  332.79  164.87 
  -2  -2   8  223.76   51.61 
   2  -2  -8  374.72  144.90 
   2  -2  -8  484.53  214.47 
   2  -2  -8  226.62  100.46 
   2   2  -7  388.61  159.03 
   2   2  -7  890.77  180.07 
   2   2  -7  782.89  237.27 
   2  -2  -7  534.66  115.82 
  -2  -2   7  582.19   68.05 
  -2  -2   7  848.56  215.08 
   2  -2  -7  831.82  211.40 
   2  -2  -7  732.80  152.05 
   2   2  -6   32.63  122.41 
   2   2  -6  -31.61  104.91 
   2   2  -6   68.58  151.41 
  -2  -2   6  -13.91   33.35 
   2  -2  -6   -9.52   36.48 
  -2  -2   6   11.30   80.12 
   2  -2  -6  -14.45   64.22 
   2  -2  -6  -85.66   73.26 
   2  -2  -6  257.60  138.32 
   2   2  -5  768.76  191.53 
   2   2  -5  889.07  147.31 
   2   2  -5  889.52  171.84 
   2  -2  -5  733.85  121.62 
  -2  -2   5  678.29  140.42 
   2  -2  -5  725.33   53.53 
   2  -2  -5  835.60  154.11 
   2  -2  -5  798.26  105.65 
  -2  -2   5  802.54   74.33 
   2   2  -4  113.32   91.07 
  -2   2   4   94.86   30.41 
   2   2  -4  108.80  127.21 
   2   2  -4   69.34   97.96 
  -2  -2   4   76.44   37.06 
  -2  -2   4   28.58   67.28 
   2  -2  -4   39.95   47.79 
   2  -2  -4   94.12   66.49 
   2  -2  -4  114.57   83.78 
   2   2  -3   86.32  116.70 
  -2   2   3    6.83   28.28 
   2   2  -3   32.37   72.84 
  -2   2   3   37.56   68.25 
   2   2  -3  101.76  100.97 
   2  -2  -3   75.70   58.47 
  -2  -2   3   -0.33   30.67 
  -2  -2   3   11.70   74.10 
   2  -2  -3   18.95   40.57 
   2  -2  -3   34.97   64.41 
   2   2  -2  153.16  127.62 
  -2   2   2  189.69   36.31 
  -2   2   2  103.76   67.47 
   2   2  -2  179.98   91.79 
   2   2  -2  368.84   80.89 
  -2   2   2  188.26   46.18 
   2  -2  -2  194.35   53.94 
   2  -2  -2  284.94   63.12 
  -2  -2   2  128.93   91.78 
  -2  -2   2   65.63   39.11 
   2  -2  -2  185.74   33.92 
   2   2  -1  -33.50   90.95 
  -2   2   1   32.14   53.60 
  -2   2   1   -8.54   53.09 
   2   2  -1   65.58   51.63 
  -2   2   1   34.92   30.06 
   2   2  -1   -8.23   62.52 
  -2  -2   1  -10.04   33.28 
   2  -2  -1    8.17   50.49 
   2  -2  -1   10.17   46.71 
  -2  -2   1   69.13   80.04 
   2   2   0   71.97   46.74 
   2   2   0   25.57   66.17 
   2   2   0  -43.91   44.54 
  -2   2   0  -25.75   45.89 
  -2   2   0   30.14   44.81 
  -2   2   0    1.34   28.45 
  -2  -2   0   24.21   31.28 
  -2  -2   0   14.03   73.82 
   2  -2   0  -11.72   42.88 
   2  -2   0   62.03   66.58 
   2   2   1  118.55   58.72 
  -2   2  -1   91.88   48.10 
  -2   2  -1   64.08   52.69 
  -2   2  -1  107.81   38.01 
  -2  -2  -1  110.99   82.69 
   2  -2   1  -50.94   48.52 
  -2  -2  -1   55.76   32.20 
   2  -2   1   62.63   70.23 
  -2   2  -2   34.84   44.09 
  -2   2  -2  100.35   48.61 
  -2   2  -2   95.19   42.99 
   2  -2   2    6.86   69.07 
  -2  -2  -2   59.83   80.74 
  -2  -2  -2   44.79   27.18 
   2  -2   2   78.64   50.46 
  -2   2  -3  301.35   57.59 
  -2   2  -3  392.96   71.07 
  -2   2  -3  296.57   58.70 
   2  -2   3  318.45   85.88 
  -2  -2  -3  266.35  107.58 
   2  -2   3  511.08   74.11 
  -2  -2  -3  391.69   33.04 
  -2   2  -4  720.62  101.62 
  -2   2  -4  773.69   92.11 
  -2   2  -4  555.23  116.27 
  -2   2  -4  762.57   81.74 
   2  -2   4  655.12   76.02 
  -2   2  -5 2442.15  199.99 
  -2   2  -5 2422.30  162.64 
  -2   2  -5 2338.73  145.26 
  -2   2  -5 2259.87  120.31 
   2  -2   5 2571.89  117.15 
  -2   2  -6  -70.22   89.80 
  -2   2  -6 -113.47   52.83 
  -2   2  -6  -54.52   60.45 
  -2   2  -6  -24.49   64.51 
   2  -2   6  -22.44   29.93 
  -2   2  -7  680.50  133.08 
  -2   2  -7  728.18   97.56 
  -2   2  -7  815.70  190.56 
  -2  -2  -7  970.04  105.50 
  -2  -2  -7  730.13  113.01 
  -2   2  -8  515.16  189.15 
  -2   2  -8  226.71  116.68 
  -2  -2  -8  447.24   79.71 
  -2  -2  -8  508.92  135.28 
  -2  -2  -8  375.50   93.95 
  -2   2  -9 2174.71  316.50 
  -2   2  -9 1875.89  228.77 
  -2  -2  -9 1792.97  190.37 
  -2  -2  -9 1682.88  245.83 
  -2   2 -10  147.28  182.44 
  -2   2 -10   90.82  148.94 
  -2  -2 -10  457.02  165.52 
  -2  -2 -10   27.58  100.44 
  -2  -2 -10  348.21  156.34 
  -2   2 -11 -231.34  161.59 
  -2   2 -11  -94.26  183.12 
  -2  -2 -11    8.47  121.48 
  -2  -2 -11  423.58  138.39 
   2   3 -11  -19.50  204.34 
   2   3 -11 -531.48  236.53 
   2  -3 -11 -159.94  124.18 
   2  -3 -11   21.52  123.77 
   2   3 -10   63.39  171.95 
   2   3 -10  187.79  275.24 
   2  -3 -10  374.57  165.48 
   2  -3 -10  366.38  138.35 
   2   3  -9  197.80  167.53 
   2   3  -9  164.66  238.37 
   2   3  -9  451.49  201.43 
   2  -3  -9  311.68  122.32 
   2  -3  -9  194.62  131.30 
   2   3  -8  181.55  176.79 
   2   3  -8  148.01  207.32 
   2   3  -8  143.20  145.79 
  -2  -3   8   32.75   45.10 
   2  -3  -8  131.19   95.16 
   2  -3  -8  -78.39   92.25 
  -2  -3   8  152.90  163.56 
   2   3  -7  189.02  180.24 
   2   3  -7  185.84  147.97 
   2   3  -7  159.53  135.03 
   2  -3  -7  121.97   98.93 
  -2  -3   7   96.76   52.98 
  -2  -3   7   65.03  145.59 
   2  -3  -7 -213.19  120.99 
   2  -3  -7  217.49   99.62 
   2   3  -6   75.69  130.25 
   2   3  -6  125.63  159.12 
   2   3  -6  167.19  125.40 
   2  -3  -6  165.72   91.29 
  -2  -3   6  -35.21   47.62 
  -2  -3   6   87.08  113.55 
   2  -3  -6  182.75   78.79 
   2  -3  -6   97.01  121.04 
   2   3  -5  217.22  157.68 
   2   3  -5   78.46  101.63 
   2   3  -5  268.12  137.54 
  -2  -3   5  101.28   59.86 
   2  -3  -5  157.77   77.42 
   2  -3  -5  207.86   72.69 
   2  -3  -5  -27.79   84.46 
  -2  -3   5   44.49  105.13 
   2   3  -4  311.93  128.15 
   2   3  -4  186.03  144.04 
   2   3  -4  156.58  100.19 
   2  -3  -4  263.79   75.74 
  -2  -3   4  341.17   71.42 
  -2  -3   4  143.96  108.38 
   2  -3  -4  305.01   72.85 
   2  -3  -4  204.48   70.82 
   2   3  -3 1093.53  174.01 
  -2   3   3 1034.15  137.05 
   2   3  -3  734.93  183.29 
  -2   3   3 1202.28   85.92 
   2   3  -3 1071.06  137.17 
   2  -3  -3 1149.11  116.55 
   2  -3  -3 1184.56  109.84 
  -2  -3   3  948.95  189.17 
  -2  -3   3 1159.32  109.08 
   2   3  -2   86.80   60.55 
  -2   3   2   67.14   41.29 
   2   3  -2  -20.20   95.38 
   2   3  -2 -134.19  115.99 
  -2   3   2   -1.53   60.83 
  -2   3   2  -79.52   64.33 
  -2  -3   2  -27.34  104.60 
   2  -3  -2   80.68   56.19 
   2  -3  -2   47.82   54.29 
  -2  -3   2   -6.65   43.76 
  -2   3   1 2165.69  159.36 
  -2   3   1 2239.19  110.99 
   2   3  -1 2319.31  231.57 
   2   3  -1 2207.88  111.56 
  -2   3   1 2046.56  147.05 
   2   3  -1 2189.16  182.70 
   2  -3  -1 2271.27  144.03 
  -2  -3   1 2033.86  120.97 
  -2  -3   1 2153.41  285.80 
   2  -3  -1 2176.08  107.71 
  -2   3   0 1002.38   90.36 
  -2   3   0 1178.09  125.09 
  -2   3   0  858.34   99.78 
   2   3   0  854.13   69.92 
   2   3   0  981.89  119.47 
   2   3   0  903.02  135.79 
  -2   3   0  911.14   71.22 
   2  -3   0 1226.30  138.05 
  -2  -3   0 1047.78   67.64 
   2  -3   0  940.60   85.52 
  -2  -3   0  974.41  171.91 
  -2  -3   0  985.42   87.88 
   2   3   1  415.74   93.01 
  -2   3  -1  386.22   67.23 
  -2   3  -1  457.88   86.39 
  -2   3  -1  418.69   73.12 
  -2   3  -1  325.68   75.43 
   2  -3   1  254.05   92.52 
  -2  -3  -1  421.89   50.47 
  -2  -3  -1  220.38  104.33 
   2  -3   1  394.43   73.47 
   2  -3   1  346.87   92.26 
  -2  -3  -1  219.08   49.89 
  -2   3  -2  426.05   76.35 
  -2   3  -2  454.21   79.06 
  -2   3  -2  355.11   84.07 
  -2   3  -2  400.79   85.63 
   2  -3   2  461.83   78.17 
   2  -3   2  301.30   85.48 
  -2  -3  -2  260.68   45.68 
  -2  -3  -2  393.52   46.31 
  -2  -3  -2  271.63  124.25 
   2  -3   2  270.26   87.59 
  -2   3  -3   40.34   53.75 
  -2   3  -3 -104.86   49.18 
  -2   3  -3  -16.45   49.52 
  -2   3  -3    7.10   63.76 
   2  -3   3    5.51   56.95 
  -2  -3  -3   -3.56   27.83 
  -2  -3  -3   -8.12   27.94 
  -2  -3  -3   17.04   86.28 
   2  -3   3   31.59   54.13 
   2  -3   3  -20.25   60.91 
  -2   3  -4  246.84   79.31 
  -2   3  -4  121.35   91.61 
  -2   3  -4  214.70   67.56 
  -2   3  -4  179.61   81.48 
  -2  -3  -4  178.62   32.23 
   2  -3   4  215.62   95.71 
  -2  -3  -4  166.42  116.62 
   2  -3   4  182.91   65.98 
   2  -3   4  172.74   48.98 
  -2  -3  -4  283.53   55.50 
  -2   3  -5 1699.81  161.36 
  -2   3  -5 1619.32  171.40 
  -2   3  -5 1781.73  220.62 
  -2   3  -5 1869.31  137.42 
  -2  -3  -5 1838.09  122.28 
   2  -3   5 1843.42  137.14 
  -2   3  -6  396.91  148.74 
  -2   3  -6  520.95   94.57 
  -2   3  -6  675.05  139.74 
   2  -3   6  599.88   87.20 
  -2   3  -7    0.60   69.46 
  -2   3  -7  124.63  114.84 
  -2   3  -7   12.49  111.12 
   2  -3   7   27.81   43.81 
  -2   3  -8  113.98  120.71 
  -2   3  -8  116.81  129.06 
  -2  -3  -8  408.37  107.74 
  -2  -3  -8  382.03  128.06 
  -2  -3  -8  137.19   77.56 
  -2   3  -9  165.30  147.69 
  -2   3  -9   20.76  151.61 
  -2  -3  -9  418.68  105.87 
  -2  -3  -9  395.75  144.23 
  -2  -3  -9  236.70   74.20 
  -2  -3  -9   10.79   70.24 
  -2   3 -10  516.79  239.68 
  -2   3 -10  445.99  198.04 
  -2  -3 -10  927.97  194.25 
  -2  -3 -10  729.12  149.07 
  -2  -3 -10  797.11  185.90 
   2   4 -10   72.19  273.87 
   2   4 -10  -90.99  163.51 
   2   4 -10 -187.36  192.36 
   2  -4 -10   97.00  113.30 
   2  -4 -10 -271.16  122.04 
   2   4  -9 -189.80  197.57 
   2   4  -9  246.94  181.49 
   2   4  -9   63.37  177.82 
  -2  -4   9  176.18  217.52 
  -2  -4   9   24.41   61.88 
   2  -4  -9   72.85  129.31 
   2  -4  -9  141.88  102.45 
   2   4  -8  131.85  210.77 
   2   4  -8  457.19  186.67 
   2   4  -8  572.86  201.40 
   2  -4  -8  327.47  120.97 
  -2  -4   8  540.19  239.12 
  -2  -4   8  386.33   88.00 
   2  -4  -8  423.36  141.82 
   2   4  -7  124.16  182.11 
   2   4  -7  102.21  148.50 
   2   4  -7  214.53  141.20 
   2  -4  -7   34.09   89.76 
   2  -4  -7  101.98   86.97 
  -2  -4   7   83.73  166.54 
  -2  -4   7  112.32   69.94 
   2   4  -6 1057.89  213.17 
   2   4  -6 1333.09  262.39 
   2   4  -6  931.05  188.67 
   2  -4  -6 1079.13  148.13 
   2  -4  -6 1355.49  155.44 
  -2  -4   6 1425.26  297.10 
  -2  -4   6 1087.27  131.83 
   2   4  -5    4.45  148.81 
   2   4  -5  -61.92  125.14 
   2   4  -5  -63.86   92.72 
  -2  -4   5    1.24   66.27 
   2  -4  -5  -16.23   60.96 
  -2  -4   5   -7.82  139.32 
   2  -4  -5  -82.07   61.99 
   2   4  -4  242.93  112.20 
   2   4  -4  184.97  167.62 
   2   4  -4  143.60  141.84 
  -2  -4   4  -18.69  188.63 
  -2  -4   4  235.67   83.33 
   2  -4  -4  267.92   76.72 
   2  -4  -4  212.37   78.91 
   2   4  -3  519.15  178.44 
   2   4  -3  629.90  163.72 
  -2   4   3  610.66  132.10 
   2   4  -3  647.05  116.30 
   2  -4  -3  573.65   84.92 
  -2  -4   3  567.75   98.34 
   2  -4  -3  490.21   98.99 
  -2  -4   3  495.61  195.29 
  -2   4   2   32.06   71.65 
   2   4  -2  203.68  145.16 
   2   4  -2   38.62  110.75 
  -2   4   2  206.03   64.36 
  -2   4   2   75.42   84.12 
   2   4  -2  175.87   68.66 
   2  -4  -2  102.08   72.69 
  -2  -4   2   60.29   64.42 
   2  -4  -2   13.77   49.54 
  -2  -4   2   28.51  120.17 
   2   4  -1  140.26  114.78 
  -2   4   1  273.06   93.33 
  -2   4   1  355.94   75.38 
  -2   4   1  296.70  109.39 
   2   4  -1  198.04   53.87 
   2   4  -1  380.11  129.78 
  -2  -4   1  166.51  123.26 
  -2  -4   1  249.82   70.68 
   2  -4  -1  208.75   82.30 
   2  -4  -1  242.32   50.14 
  -2   4   0  345.20   73.63 
  -2   4   0  198.22   68.33 
  -2   4   0  266.78  106.55 
   2   4   0  211.20   98.82 
  -2   4   0   75.26   68.60 
   2   4   0  295.80  106.29 
   2  -4   0   68.42   83.71 
   2  -4   0  157.22   99.24 
   2  -4   0  129.14   59.82 
  -2  -4   0  262.05   55.06 
  -2  -4   0  173.89   60.20 
  -2  -4   0  191.59  111.08 
   2   4   1  671.46  123.88 
  -2   4  -1  563.16  100.64 
  -2   4  -1  536.52   90.73 
  -2   4  -1  467.65  122.32 
  -2   4  -1  522.46   90.81 
  -2  -4  -1  498.42   66.13 
  -2  -4  -1  412.00   65.78 
   2  -4   1  747.70  123.17 
   2  -4   1  389.82  116.36 
  -2  -4  -1  395.41  144.74 
   2  -4   1  642.25   97.22 
  -2   4  -2 3539.27  186.84 
  -2   4  -2 3439.68  218.21 
  -2   4  -2 3509.07  174.79 
  -2   4  -2 3303.61  175.40 
  -2  -4  -2 3217.96  348.73 
   2  -4   2 3822.23  172.25 
   2  -4   2 3707.36  293.16 
   2  -4   2 3234.06  196.60 
  -2  -4  -2 3450.39  132.00 
  -2  -4  -2 3338.05  124.54 
  -2   4  -3  493.27  100.14 
  -2   4  -3  410.43  120.84 
  -2   4  -3  597.59  119.54 
  -2   4  -3  444.36   95.92 
   2  -4   3  639.88  127.95 
  -2  -4  -3  507.49   62.14 
   2  -4   3  520.60   93.96 
   2  -4   3  514.02  135.42 
  -2  -4  -3  416.91  159.48 
  -2  -4  -3  456.01   67.41 
  -2   4  -4  582.09  130.48 
  -2   4  -4  537.26   99.64 
  -2   4  -4  597.10  135.81 
   2  -4   4  455.27  122.06 
  -2  -4  -4  347.23  168.83 
  -2  -4  -4  731.03   83.38 
   2  -4   4  527.89  125.61 
   2  -4   4  628.93   98.88 
  -2   4  -5  103.33   77.88 
  -2   4  -5   74.87  104.08 
  -2   4  -5   38.57   91.09 
   2  -4   5   32.19   66.06 
   2  -4   5  109.18   67.73 
  -2  -4  -5   -2.41   42.29 
  -2  -4  -5  -23.86  133.58 
  -2   4  -6   89.10   78.58 
  -2   4  -6  -16.94  114.27 
  -2   4  -6   57.28  111.18 
  -2  -4  -6    0.07   51.38 
   2  -4   6   15.95   62.99 
  -2  -4  -6  231.56  151.48 
  -2  -4  -6  196.10   87.27 
  -2   4  -7   42.13  122.97 
  -2   4  -7  101.03  121.01 
  -2   4  -7  168.90   82.99 
  -2  -4  -7  215.18   93.79 
   2  -4   7  -27.51   61.89 
  -2  -4  -7  -51.92   56.36 
  -2   4  -8  -88.64  140.05 
  -2  -4  -8  148.44   93.04 
   2  -4   8   93.19   94.31 
  -2  -4  -8  276.17  103.04 
   2   5 -10  159.63  193.02 
   2   5 -10  816.23  262.11 
   2   5 -10  -19.11  286.56 
   2  -5 -10  149.85  140.59 
   2   5  -9  176.77  194.23 
   2   5  -9   28.61  228.59 
   2   5  -9  -67.14  148.86 
   2  -5  -9  -72.33   99.69 
  -2  -5   9   -3.28   71.65 
   2   5  -8  127.46  174.64 
   2   5  -8    9.35  144.09 
   2   5  -8  263.25  238.42 
   2  -5  -8   16.96   97.30 
  -2  -5   8  253.53  238.22 
  -2  -5   8   28.26   82.48 
   2   5  -7  211.60  160.87 
   2   5  -7  158.44  205.50 
   2   5  -7  185.01  132.01 
   2  -5  -7  165.79  106.85 
  -2  -5   7  431.99  250.68 
  -2  -5   7   97.30   90.11 
   2   5  -6  156.14  158.20 
   2   5  -6  337.80  137.19 
   2   5  -6  134.21  194.66 
   2  -5  -6  141.14   93.70 
   2  -5  -6  126.31   91.71 
  -2  -5   6  514.45  268.81 
  -2  -5   6  352.51  102.68 
   2   5  -5  593.64  218.46 
   2   5  -5  810.00  158.54 
   2   5  -5  320.34  163.12 
  -2  -5   5  671.33  129.72 
   2  -5  -5  608.37  126.18 
  -2  -5   5  387.69  266.39 
   2  -5  -5  469.80   98.84 
   2   5  -4    3.72   79.42 
   2   5  -4   71.35  137.54 
   2   5  -4   86.63  188.81 
  -2  -5   4  145.52  253.24 
   2  -5  -4  -65.38   59.93 
   2  -5  -4  113.55   88.09 
  -2  -5   4  105.26   80.20 
   2   5  -3 1087.86  133.18 
  -2   5   3  790.66  119.37 
   2   5  -3  740.79  216.35 
   2   5  -3  717.07  187.52 
  -2  -5   3  997.41  141.29 
   2  -5  -3 1030.78  144.51 
   2  -5  -3 1027.02  101.59 
  -2  -5   3  813.09  260.73 
   2   5  -2  115.62   63.26 
   2   5  -2   60.12  126.96 
  -2   5   2  218.63  104.82 
  -2   5   2  145.24  103.55 
   2   5  -2 -140.85  117.97 
  -2  -5   2  237.70   89.40 
   2  -5  -2  189.00   93.14 
   2  -5  -2  230.22   52.84 
  -2  -5   2  109.25  161.85 
  -2   5   1  405.98  118.33 
   2   5  -1  444.08  149.44 
   2   5  -1  623.95  165.67 
  -2   5   1  434.14  129.36 
  -2  -5   1  617.05  197.67 
  -2  -5   1  479.00   91.51 
   2  -5  -1  695.35  129.43 
  -2  -5   1  489.65   82.86 
   2  -5  -1  477.65   91.34 
   2  -5  -1  460.91  177.03 
   2  -5  -1  677.27   74.46 
  -2   5   0  126.36   87.94 
  -2   5   0 -164.97  115.45 
  -2   5   0  132.46   89.84 
   2   5   0  124.10   99.60 
   2   5   0   59.17  100.22 
  -2  -5   0   83.82  116.36 
  -2  -5   0  151.31   55.52 
   2  -5   0   24.11   84.99 
   2  -5   0   74.25   64.31 
  -2  -5   0   33.61   53.31 
   2  -5   0   85.42  113.64 
  -2   5  -1  580.86  117.90 
   2   5   1  293.52  113.00 
  -2   5  -1  258.15  147.61 
   2   5   1  545.51  128.05 
  -2   5  -1  389.19  108.62 
   2  -5   1  601.82   99.48 
  -2  -5  -1  246.86  142.88 
  -2  -5  -1  305.38   66.66 
   2  -5   1  438.95  154.82 
  -2  -5  -1  523.48   79.13 
   2  -5   1  358.26  109.24 
  -2   5  -2   17.47   78.25 
  -2   5  -2   86.12   90.35 
  -2   5  -2  220.51  130.80 
   2  -5   2   31.61   85.11 
  -2  -5  -2  209.51   71.49 
   2  -5   2  115.68  121.81 
  -2  -5  -2   64.26   46.90 
  -2  -5  -2   19.95   99.47 
   2  -5   2   91.97   65.50 
  -2   5  -3  252.38   93.65 
  -2   5  -3  320.12  140.21 
  -2   5  -3  369.21  126.07 
   2  -5   3  241.90  187.88 
  -2  -5  -3  341.50   77.63 
  -2  -5  -3  204.13  147.73 
  -2  -5  -3  253.55   56.41 
   2  -5   3  292.48   81.17 
   2  -5   3  253.77   98.72 
  -2   5  -4  142.51   87.85 
  -2   5  -4  117.14  113.21 
  -2   5  -4  370.27  167.84 
   2  -5   4   25.86  170.81 
   2  -5   4   16.36   63.54 
  -2  -5  -4   16.59  141.58 
   2  -5   4   22.11   85.75 
  -2  -5  -4  154.16   66.21 
  -2   5  -5  -94.75   97.38 
  -2   5  -5   14.48   71.58 
  -2   5  -5   33.28  132.49 
  -2  -5  -5  131.24  167.92 
  -2  -5  -5   20.15   56.68 
   2  -5   5   94.01   69.84 
  -2   5  -6  685.91  115.84 
  -2   5  -6  288.52  151.91 
  -2   5  -6  305.04  166.07 
  -2  -5  -6  735.50  287.23 
  -2  -5  -6  598.13  108.07 
   2  -5   6  566.81  113.39 
  -2   5  -7 1367.12  240.11 
  -2   5  -7 1865.98  299.83 
  -2  -5  -7 3190.12  455.30 
   2  -5   7 2068.82  180.38 
  -2   5  -8  145.97  182.32 
  -2   5  -8  264.65  204.88 
   2   6  -9  205.40  174.26 
   2   6  -9 -169.66  238.43 
   2   6  -9  297.75  195.72 
   2  -6  -9  -89.67  128.87 
  -2  -6   9  187.67  108.96 
   2   6  -8  974.95  250.68 
   2   6  -8  798.13  199.16 
   2   6  -8  384.84  281.58 
  -2  -6   8 1799.46  390.98 
  -2  -6   8  897.81  162.65 
   2  -6  -8  996.58  199.86 
   2   6  -7  -51.17  164.49 
   2   6  -7 -105.02  199.01 
   2   6  -7  -17.18  120.14 
  -2  -6   7  653.75  271.33 
   2  -6  -7   51.65  103.87 
  -2  -6   7  -31.82   88.85 
   2   6  -6   72.17  113.36 
   2   6  -6   73.27  148.68 
   2   6  -6 -170.66  178.01 
   2  -6  -6  -87.15   87.60 
  -2  -6   6  259.36  107.85 
  -2  -6   6  507.96  305.49 
   2   6  -5  260.70  118.85 
   2   6  -5  373.58  175.57 
   2   6  -5  172.57  201.41 
   2  -6  -5  374.33  122.29 
  -2  -6   5  326.01  119.39 
  -2  -6   5 1010.57  427.90 
   2   6  -4  137.22  184.15 
   2   6  -4  160.75  152.99 
   2  -6  -4  162.68  102.02 
  -2  -6   4  328.24  108.34 
  -2  -6   4   97.81  325.53 
   2   6  -3  188.60  162.39 
  -2   6   3  237.49  101.62 
   2   6  -3  269.44  149.84 
   2  -6  -3  116.27   99.45 
  -2  -6   3  458.48  299.87 
  -2  -6   3  320.54  105.04 
   2   6  -2  185.49  141.32 
  -2   6   2   16.22  104.12 
   2   6  -2   59.72  142.82 
   2  -6  -2  158.42  146.47 
   2  -6  -2  137.24  105.03 
   2  -6  -2  136.97   81.81 
  -2  -6   2   -6.58  178.69 
  -2  -6   2   88.25   80.46 
   2   6  -1  399.77  140.69 
  -2   6   1  275.69  123.28 
   2   6  -1  292.36  147.61 
  -2   6   1  585.77  142.15 
   2  -6  -1  252.54  116.65 
  -2  -6   1  240.33   84.96 
  -2  -6   1  279.26   74.65 
   2  -6  -1  219.70   93.18 
   2  -6  -1  135.91  184.93 
  -2  -6   1  216.32  170.68 
   2   6   0  -46.23  105.36 
  -2   6   0  -37.88   83.87 
   2   6   0   21.81   90.48 
  -2   6   0  -83.40  114.51 
   2  -6   0   15.37   65.27 
   2  -6   0   29.72  148.39 
   2  -6   0   89.96   92.22 
  -2  -6   0   -3.97   58.60 
  -2  -6   0    8.97  119.53 
  -2  -6   0  157.21   60.12 
  -2   6  -1  189.80  108.20 
   2   6   1   49.67   95.98 
  -2   6  -1   47.56  112.22 
  -2   6  -1   75.30  135.54 
   2   6   1   39.42  103.95 
  -2  -6  -1   51.69  126.03 
   2  -6   1  118.61  162.16 
   2  -6   1  150.90   76.42 
   2  -6   1   80.70   85.18 
  -2  -6  -1   48.39   58.61 
  -2   6  -2 -213.93  136.83 
  -2   6  -2  -93.64  102.87 
  -2   6  -2  -22.08   88.90 
   2  -6   2   17.06   61.85 
   2  -6   2   32.99  186.02 
   2  -6   2   -5.31   72.04 
  -2  -6  -2   74.76   53.66 
  -2  -6  -2  -32.40  108.19 
  -2   6  -3  106.20  153.04 
  -2   6  -3   97.72  124.82 
  -2   6  -3  305.21  109.66 
   2  -6   3  124.82   75.01 
  -2  -6  -3  126.66   60.88 
   2  -6   3  157.75   92.82 
   2  -6   3  192.84  245.16 
  -2  -6  -3  193.60  167.00 
  -2   6  -4 1856.79  193.44 
  -2   6  -4 1336.24  237.15 
  -2   6  -4 1426.04  228.12 
   2  -6   4 1543.75  156.22 
   2  -6   4 1640.42  547.23 
   2  -6   4 1219.59  174.90 
  -2  -6  -4 1837.56  377.59 
  -2   6  -5  297.58  110.91 
  -2   6  -5  299.46  166.34 
  -2   6  -5  249.63  172.18 
   2  -6   5  330.32   94.44 
  -2  -6  -5  236.64  240.96 
  -2   6  -6  284.22  111.61 
  -2   6  -6  -53.39  162.50 
  -2   6  -6   42.45  153.49 
  -2  -6  -6  176.33  258.11 
   2  -6   6   52.38   74.09 
  -2   6  -7   51.90  202.50 
  -2   6  -7   20.65  179.71 
   2  -6   7  115.05   85.50 
  -2   6  -8  845.43  278.15 
  -2   6  -8  614.74  259.41 
   2  -6   8 1106.82  158.73 
   2   7  -8  207.64  173.70 
   2   7  -8  -56.01  250.80 
  -2  -7   8 -151.67   82.66 
   2  -7  -8 -241.55  126.00 
   2   7  -7  329.49  191.39 
   2   7  -7   12.25  235.40 
  -2  -7   7   67.03  102.45 
   2  -7  -7   27.46  140.73 
  -2  -7   7 1169.71  349.74 
   2   7  -6   74.34  150.17 
   2   7  -6   -2.54  199.07 
  -2  -7   6  481.58  382.52 
   2  -7  -6 -149.06  107.46 
  -2  -7   6  -19.27   99.79 
   2   7  -5  -83.23  184.62 
   2   7  -5  232.12  157.91 
  -2  -7   5  152.95  104.96 
   2  -7  -5   72.91  120.35 
  -2  -7   5   36.18  450.46 
   2   7  -4  628.59  179.82 
   2   7  -4  808.84  226.87 
  -2  -7   4  604.53  130.29 
   2  -7  -4 1464.10  350.10 
   2  -7  -4  595.76  154.71 
  -2  -7   4  680.97  469.63 
   2   7  -3  187.27  140.61 
   2   7  -3  272.92  165.29 
   2  -7  -3  161.41  186.39 
  -2  -7   3   -3.41   81.10 
   2  -7  -3    7.74   91.17 
  -2  -7   3  116.97  347.40 
   2  -7  -3  -72.73  105.02 
   2   7  -2   44.74  123.08 
   2   7  -2  133.24  120.98 
  -2   7   2   72.72   94.86 
  -2  -7   2 -200.30  239.78 
   2  -7  -2  177.21  206.36 
  -2  -7   2  -87.85   69.18 
   2  -7  -2   76.07   85.88 
   2  -7  -2   47.75  112.50 
   2   7  -1  200.64  135.73 
   2   7  -1  112.56  108.50 
  -2   7   1  259.79  131.55 
   2  -7  -1  222.22  222.16 
  -2  -7   1  230.65   86.97 
   2  -7  -1  339.12   97.39 
   2  -7  -1  197.85  106.58 
  -2  -7   1  245.84  241.01 
   2   7   0 1912.95  221.73 
   2   7   0 1938.87  265.39 
  -2   7   0 1656.24  228.32 
  -2   7   0 1821.72  225.00 
   2  -7   0 1888.70  200.96 
   2  -7   0 1940.51  180.90 
  -2  -7   0 1855.64  164.99 
   2  -7   0 2853.16  439.74 
  -2  -7   0 1782.60  348.56 
  -2   7  -1  -54.19   93.43 
  -2   7  -1  148.91  134.67 
   2  -7   1 -165.47  193.52 
   2  -7   1   29.64   75.21 
  -2  -7  -1  -44.52  149.81 
  -2  -7  -1   38.40   58.33 
   2  -7   1   80.50   84.95 
  -2   7  -2  120.44  104.16 
  -2   7  -2   13.34  140.22 
   2  -7   2    3.24   70.09 
   2  -7   2  -21.29   62.49 
   2  -7   2 -177.09  229.74 
  -2  -7  -2 -105.95  139.94 
  -2  -7  -2  -78.63   45.68 
  -2   7  -3  296.30  118.43 
  -2   7  -3  -38.70  147.95 
  -2   7  -3   62.30  157.38 
   2  -7   3 -474.70  295.49 
   2  -7   3   56.80   70.17 
  -2  -7  -3 -109.96  150.86 
   2  -7   3  -16.92   74.43 
  -2   7  -4  230.78  173.14 
  -2   7  -4  356.55  193.29 
  -2   7  -4  576.49  133.57 
   2  -7   4  436.08   99.54 
  -2  -7  -4  309.50  257.05 
   2  -7   4  448.93  125.16 
  -2   7  -5  684.25  216.68 
  -2   7  -5  635.54  155.83 
  -2   7  -5  -26.30  195.59 
   2  -7   5  464.85  110.38 
  -2  -7  -5  800.76  360.00 
  -2   7  -6   56.33  194.34 
  -2   7  -6 -104.97  159.26 
  -2   7  -6  109.38  102.05 
   2  -7   6   -3.22   85.50 
  -2  -7  -6  399.32  302.47 
  -2   7  -7   13.92  208.97 
  -2   7  -7 -191.50  172.67 
   2  -7   7   85.29   91.45 
   2   8  -6  635.59  253.64 
   2   8  -6  407.63  184.62 
   2  -8  -6  394.60  178.20 
  -2  -8   6  962.30  456.91 
  -2  -8   6  258.26  120.08 
   2   8  -5  247.38  170.54 
   2   8  -5  303.93  201.67 
   2  -8  -5   13.81  141.90 
  -2  -8   5  225.67  115.70 
  -2  -8   5  398.35  505.89 
   2   8  -4   69.54  132.97 
   2   8  -4   -9.75  147.88 
  -2  -8   4   42.71   82.74 
   2  -8  -4  849.75  304.14 
   2  -8  -4   54.56  133.93 
  -2  -8   4 -285.05  450.36 
   2   8  -3  354.21  162.01 
   2   8  -3  222.13  151.07 
   2  -8  -3 1010.94  325.10 
   2  -8  -3  319.17  150.46 
   2  -8  -3  255.22  110.67 
  -2  -8   3 -217.23  399.25 
  -2  -8   3  634.77  129.95 
   2   8  -2   24.04  121.75 
   2   8  -2  272.97  137.12 
  -2   8   2  118.48  103.47 
   2  -8  -2   84.77   89.81 
  -2  -8   2  149.74   88.94 
   2  -8  -2   -7.18  111.26 
  -2  -8   2  -68.46  357.24 
   2  -8  -2  199.05  239.82 
   2   8  -1  296.28  147.19 
  -2   8   1  325.14  139.49 
   2  -8  -1  437.76  279.41 
   2  -8  -1  248.27  125.18 
   2  -8  -1  392.31  110.46 
  -2  -8   1  248.91  328.47 
  -2  -8   1  248.44   97.64 
  -2   8   0  260.52  144.46 
   2   8   0  189.90  135.88 
   2  -8   0  299.60  114.91 
  -2  -8   0 -193.88  244.22 
   2  -8   0  235.46   98.09 
   2  -8   0  277.15  274.24 
  -2  -8   0  159.45   82.57 
  -2   8  -1  575.09  180.95 
   2  -8   1  528.72  114.35 
   2  -8   1  555.97  126.52 
  -2  -8  -1  189.99  274.57 
  -2  -8  -1  382.25  100.20 
   2  -8   1  234.70  279.21 
  -2   8  -2  708.28  200.60 
  -2   8  -2  478.02  149.66 
   2  -8   2  222.46  101.55 
   2  -8   2  -41.67  311.39 
  -2  -8  -2  288.35  290.84 
  -2  -8  -2  245.63   79.58 
   2  -8   2  435.95  117.74 
  -2   8  -3  497.15  152.31 
  -2   8  -3  252.79  179.85 
   2  -8   3  615.73  131.48 
  -2  -8  -3  355.74  317.39 
   2  -8   3  396.83  107.87 
  -2   8  -4  508.94  153.83 
  -2   8  -4  618.89  219.86 
   2  -8   4  233.47  101.45 
   2  -8   4  452.70  108.22 
  -2  -8  -4  590.40  362.87 
  -2   8  -5   24.71  112.60 
  -2   8  -5  -92.33  171.90 
   2  -8   5   71.29   81.60 
  -2  -8  -5  380.41  350.59 
  -2   8  -6 -108.51  185.24 
   2  -8   6   14.45   85.95 
  -2  -8  -6  596.94  341.47 
   2   9  -4  -52.28  148.77 
  -2  -9   4 -451.55  502.45 
   2   9  -3  366.13  172.54 
  -2  -9   3   41.29  488.56 
  -2  -9   3  536.44  134.66 
  -2   9   2   24.34  118.65 
   2   9  -2  328.55  160.73 
   2  -9  -2   48.47  107.29 
   2  -9  -2    5.55   96.53 
  -2  -9   2   -7.15   85.58 
  -2  -9   2 -424.76  425.53 
   2  -9  -2  415.91  302.35 
   2   9  -1  -80.87  104.46 
  -2   9   1  335.57  145.57 
   2  -9  -1  405.21  126.19 
   2  -9  -1  174.38  109.37 
  -2  -9   1  145.67   91.16 
  -2  -9   1 -646.94  361.27 
   2  -9  -1  634.33  325.59 
  -2   9   0  202.69  148.23 
   2  -9   0   45.25   85.41 
  -2  -9   0 -408.68  376.57 
   2  -9   0   62.15   93.49 
   2  -9   0  -21.90  281.58 
  -2  -9   0   -0.43   78.89 
  -2   9  -1  235.87  157.33 
  -2  -9  -1  163.44  367.45 
   2  -9   1  408.07  113.71 
  -2  -9  -1  231.70   97.65 
   2  -9   1   79.23   96.96 
   2  -9   1 -116.26  336.72 
  -2   9  -2   19.67  132.71 
  -2  -9  -2  124.65  360.83 
   2  -9   2   26.49   86.68 
   2  -9   2  148.01   90.02 
  -2   9  -3  238.37  181.50 
   2  -9   3   25.48   78.82 
  -2  -9  -3  185.99  375.74 
   2  -9   3  120.94   95.52 
  -2   9  -4  381.25  203.56 
  -2  -9  -4  790.51  446.26 
   2  -9   4   19.08   87.09 
   3   0 -11  190.24   87.71 
   3   0 -11 -216.64  141.15 
   3   0 -11 -170.31  287.76 
   3   0 -10 -267.19  231.18 
   3   0 -10  -27.82  143.85 
   3   0  -9   82.21  219.21 
   3   0  -9 -131.04  120.43 
   3   0  -8 1456.76  303.46 
   3   0  -8 2007.72  278.49 
   3   0  -7  146.35  184.27 
  -3   0   7    7.91   30.91 
   3   0  -7   50.12  106.89 
   3   0  -6  369.85  129.99 
   3   0  -6  361.03  104.60 
  -3   0   6  289.73   44.55 
   3   0  -6  -28.35  156.54 
   3   0  -5   27.03   76.00 
   3   0  -5   65.46   65.17 
   3   0  -5  -17.24  130.32 
  -3   0   5  -15.38   26.81 
  -3   0   4 2356.68  210.73 
   3   0  -4 2410.01  253.66 
   3   0  -4 2145.50  169.86 
   3   0  -4 2390.19  102.66 
  -3   0   4 2329.99   83.47 
   3   0  -3  -62.84   30.83 
  -3   0   3   -4.63   23.91 
   3   0  -3   77.33   74.30 
   3   0  -3  112.56  118.53 
  -3   0   3   -3.07   39.20 
  -3   0   3  -28.32   36.16 
   3   0  -3    8.85   24.57 
  -3   0   2  -13.28   39.51 
   3   0  -2  -31.86   76.85 
   3   0  -2    1.31   31.86 
  -3   0   2   16.21   29.14 
   3   0  -2   62.54   61.67 
  -3   0   2    0.31   24.85 
  -3   0   1  -30.52   33.56 
   3   0  -1  -46.56   51.31 
  -3   0   1   22.69   27.45 
   3   0  -1  -36.14   33.59 
   3   0  -1  -18.93   62.66 
  -3   0   1   10.77   24.43 
   3   0   0  622.92   81.06 
   3   0   0  671.61   83.56 
  -3   0   0  640.96   53.55 
   3   0   0  620.39   94.61 
  -3   0   0  561.28   44.53 
  -3   0   0  399.90   64.48 
   3   0   1   10.86   54.46 
  -3   0  -1   21.83   20.59 
  -3   0  -1   27.06   28.55 
  -3   0  -1  -10.31   37.82 
   3   0   1   54.10   50.24 
  -3   0  -2 1775.32  121.55 
  -3   0  -2 1783.98   83.13 
  -3   0  -2 1777.20   64.53 
   3   0   2 1917.63  104.22 
   3   0   3    8.69   28.08 
  -3   0  -3   14.24   19.31 
  -3   0  -3   50.15   30.51 
  -3   0  -3   -6.70   45.96 
  -3   0  -4  144.68   54.21 
  -3   0  -4  239.61   34.64 
  -3   0  -4  126.64   72.10 
  -3   0  -4  149.86   42.18 
  -3   0  -5   18.68   27.75 
  -3   0  -5   46.24   33.90 
  -3   0  -5   22.42   44.09 
  -3   0  -6 6998.64  248.84 
  -3   0  -6 7008.95  198.59 
  -3   0  -7    1.44   68.50 
  -3   0  -7    7.38   41.78 
  -3   0  -8  136.33  113.94 
  -3   0  -8   65.22   74.65 
  -3   0  -8   47.15   56.29 
  -3   0  -9  142.42   95.47 
  -3   0  -9  174.16  123.27 
  -3   0 -10 1038.27  230.35 
  -3   0 -10  694.52  161.05 
  -3   0 -11   57.67  158.23 
  -3   0 -11 -183.27  115.35 
   3   1 -11  297.11  224.31 
   3   1 -11  -74.01  311.93 
   3  -1 -11  184.62  113.62 
   3  -1 -11  -22.76  170.09 
   3  -1 -11   23.60  447.14 
   3   1 -10 -135.47  153.52 
   3   1 -10  -49.81  251.96 
   3  -1 -10 -465.13  218.56 
   3  -1 -10  145.37  147.36 
   3  -1 -10   35.04   83.71 
   3   1  -9  558.25  286.19 
   3   1  -9  417.72  193.48 
   3  -1  -9  310.57  150.69 
   3  -1  -9   40.73  223.54 
   3  -1  -9  230.39  106.21 
   3   1  -8  245.24  218.34 
   3   1  -8  258.46  158.89 
   3  -1  -8  295.08   96.37 
   3  -1  -8  199.15  126.19 
  -3  -1   8  344.26   55.32 
   3  -1  -8  311.22  219.49 
   3   1  -7  532.18  221.96 
   3   1  -7  676.50  155.64 
   3   1  -7  443.67  158.64 
   3  -1  -7  806.24  222.38 
  -3  -1   7  814.52   69.88 
   3  -1  -7  638.01  117.00 
   3  -1  -7  655.17  163.03 
   3   1  -6  182.41  129.62 
   3   1  -6  130.82  113.43 
  -3   1   6  206.72   36.55 
   3   1  -6  175.73  175.96 
  -3  -1   6   69.40   81.42 
  -3  -1   6  140.02   42.49 
   3  -1  -6  293.47  110.17 
   3  -1  -6  254.74  158.89 
   3  -1  -6   69.99   65.25 
   3   1  -5  249.93  113.47 
  -3   1   5  370.64   46.45 
   3   1  -5  319.57  175.86 
   3   1  -5  615.87  119.65 
  -3  -1   5  251.36   95.61 
   3  -1  -5  434.18  110.96 
   3  -1  -5  375.22   79.77 
   3  -1  -5  523.37  155.49 
  -3  -1   5  316.62   48.27 
  -3   1   4  954.20   59.82 
   3   1  -4 1041.30  124.07 
  -3   1   4 1113.36   95.31 
   3   1  -4  961.15  202.32 
   3   1  -4 1138.83  152.43 
  -3  -1   4 1044.61   68.23 
  -3  -1   4  806.91  138.76 
   3  -1  -4 1220.26  117.75 
   3  -1  -4 1001.68  128.34 
   3  -1  -4 1290.40  171.78 
  -3   1   3  106.28   57.17 
   3   1  -3  165.27  142.98 
   3   1  -3  245.69   91.62 
  -3   1   3  243.23   36.74 
   3   1  -3  264.05   71.96 
  -3  -1   3  174.23   36.55 
  -3  -1   3  243.17   26.63 
   3  -1  -3  266.89   79.52 
   3  -1  -3  233.54   95.42 
   3  -1  -3  212.97   55.88 
  -3  -1   3  117.69   66.73 
  -3   1   2 3077.27  116.99 
   3   1  -2 2875.37  207.34 
   3   1  -2 2928.57  104.66 
   3   1  -2 3252.54  117.64 
  -3   1   2 3134.90   94.48 
   3   1  -2 2910.25  160.01 
   3  -1  -2 3093.25  136.56 
  -3  -1   2 3134.11   77.29 
   3  -1  -2 2987.99  151.33 
  -3  -1   2 3046.79  224.58 
  -3  -1   2 3024.60   96.49 
   3  -1  -2 3116.75  130.73 
  -3   1   1   33.37   44.93 
  -3   1   1   72.10   24.97 
   3   1  -1   68.79   77.01 
  -3   1   1   62.57   26.90 
   3   1  -1   61.86   65.30 
   3   1  -1   44.13   25.81 
   3  -1  -1   86.30   44.03 
   3  -1  -1   74.08   49.83 
  -3  -1   1   70.20   28.12 
   3  -1  -1  116.18   67.88 
  -3  -1   1  -62.42   58.40 
  -3  -1   1   41.06   25.19 
   3   1   0 5097.89  193.59 
   3   1   0 4595.29  122.84 
   3   1   0 4877.01  181.85 
  -3   1   0 5048.87  118.30 
  -3   1   0 5082.62  124.92 
  -3   1   0 5156.22  137.91 
  -3  -1   0 5128.86  116.27 
   3  -1   0 4894.33  188.38 
   3  -1   0 4982.07  183.39 
  -3  -1   0 4995.14  261.89 
   3   1   1  547.47   88.21 
   3   1   1  703.00   46.26 
  -3   1  -1  675.14   64.62 
  -3   1  -1  672.07   53.62 
  -3   1  -1  710.54   65.10 
   3  -1   1  597.91   95.70 
   3  -1   1  602.62   85.70 
  -3  -1  -1  710.39   45.94 
  -3  -1  -1  496.33  101.05 
  -3   1  -2 2150.93   96.44 
  -3   1  -2 1916.70  102.99 
  -3   1  -2 2082.35   82.47 
  -3  -1  -2 2029.03   63.79 
   3  -1   2 1832.85  134.89 
  -3  -1  -2 2001.49  214.98 
  -3   1  -3 2155.36  118.63 
  -3   1  -3 2019.85  103.01 
  -3   1  -3 2151.26   87.68 
   3  -1   3 2160.56  109.54 
  -3  -1  -3 1950.37   96.83 
  -3  -1  -3 2065.59  227.24 
  -3  -1  -3 2163.34   61.47 
   3  -1   3 2101.16  139.22 
  -3   1  -4  143.03   47.11 
  -3   1  -4  158.01   57.93 
  -3   1  -4  185.19   42.82 
   3  -1   4  164.55   42.30 
  -3  -1  -4  164.07   91.75 
  -3  -1  -4  200.09   24.56 
  -3  -1  -4  185.38   46.69 
  -3   1  -5 1122.12   98.83 
  -3   1  -5 1054.72  117.86 
  -3   1  -5 1183.65   85.34 
  -3  -1  -5 1046.72   53.74 
   3  -1   5 1070.40   45.88 
  -3  -1  -5 1378.96  211.23 
  -3  -1  -5 1024.92   90.96 
  -3   1  -6  514.85  100.23 
  -3   1  -6  719.00   88.60 
  -3   1  -6  630.84   84.28 
  -3  -1  -6  785.47   85.30 
  -3  -1  -6  606.61  100.62 
  -3   1  -7  764.77  177.22 
  -3   1  -7  615.34  120.03 
  -3   1  -7  647.11   87.67 
  -3  -1  -7  644.06   84.75 
  -3  -1  -7  667.99  112.12 
  -3   1  -8   -8.09   64.60 
  -3   1  -8 -123.37   93.16 
  -3   1  -8 -124.60   63.88 
  -3  -1  -8   80.16   73.94 
  -3  -1  -8   22.34   46.56 
  -3  -1  -8   78.01   84.91 
  -3   1  -9  928.55  225.75 
  -3   1  -9  888.48  163.76 
  -3  -1  -9  999.34  157.70 
  -3  -1  -9 1124.61  146.14 
  -3  -1  -9 1122.94  209.39 
  -3   1 -10  518.85  220.23 
  -3   1 -10  607.48  167.12 
  -3  -1 -10  556.73  177.98 
  -3  -1 -10  536.52  135.83 
  -3   1 -11  -16.60  130.18 
  -3   1 -11  212.99  168.51 
  -3  -1 -11  193.55  142.80 
  -3  -1 -11  613.45  152.75 
  -3  -1 -11  -44.01  111.47 
   3   2 -11   70.63  205.71 
   3   2 -11 -280.55  285.02 
   3  -2 -11   46.09  114.81 
   3  -2 -11  107.01  169.51 
   3   2 -10 -199.59  257.49 
   3   2 -10  -61.28  162.30 
   3  -2 -10   25.66  101.27 
   3  -2 -10  -68.39  130.65 
   3   2  -9  155.84  175.13 
   3   2  -9    4.37  226.36 
   3  -2  -9  269.88  110.27 
   3  -2  -9  -94.61  104.32 
   3  -2  -9 -108.73  341.96 
   3   2  -8 -120.12  140.24 
   3   2  -8  150.08  217.94 
   3   2  -8   57.67  154.00 
   3  -2  -8  -35.40  100.37 
   3  -2  -8  139.01   90.46 
  -3  -2   8   86.73   46.43 
   3  -2  -8  -58.66  178.66 
   3   2  -7  -31.23  182.96 
   3   2  -7   76.28  144.66 
   3   2  -7  -53.51  112.07 
   3  -2  -7   40.54   97.56 
  -3  -2   7  -14.24  100.71 
  -3  -2   7   18.47   41.70 
   3  -2  -7   98.85  154.24 
   3  -2  -7   -6.38   68.34 
   3   2  -6  406.09  150.00 
   3   2  -6  444.28  211.64 
   3   2  -6  580.72  156.20 
   3  -2  -6  257.61  149.53 
  -3  -2   6  300.87  135.40 
   3  -2  -6  401.15  117.16 
  -3  -2   6  289.04   56.56 
   3  -2  -6  303.39   88.44 
   3   2  -5 3449.96  244.83 
   3   2  -5 3579.88  256.99 
   3   2  -5 3420.11  317.32 
  -3   2   5 3514.69  102.41 
   3  -2  -5 3541.35  200.24 
  -3  -2   5 3287.79  127.60 
   3  -2  -5 3259.22  214.74 
   3  -2  -5 3507.90  184.76 
  -3  -2   5 3546.26  313.99 
   3   2  -4   71.97   96.88 
   3   2  -4   45.23  151.49 
  -3   2   4  -28.17   64.11 
  -3   2   4   90.63   34.62 
   3   2  -4   80.19   95.79 
   3  -2  -4   22.17   80.91 
   3  -2  -4   78.16   70.33 
  -3  -2   4   70.52   39.13 
   3  -2  -4  100.30   55.75 
  -3  -2   4   22.53   71.37 
  -3   2   3 1994.49   86.18 
   3   2  -3 1741.91  170.82 
   3   2  -3 1950.56  164.69 
  -3   2   3 1835.00  135.15 
   3   2  -3 1686.26  236.16 
   3  -2  -3 1810.67  128.63 
  -3  -2   3 1869.80  237.15 
  -3  -2   3 1854.81   97.04 
   3  -2  -3 1848.76  103.80 
   3  -2  -3 1778.67  118.73 
  -3   2   2 1206.60  107.75 
   3   2  -2 1079.99  126.68 
   3   2  -2 1174.94  189.76 
   3   2  -2 1102.26  120.02 
  -3   2   2 1100.18   88.16 
  -3   2   2 1064.18   70.33 
   3  -2  -2  973.08   64.11 
   3  -2  -2  989.18  106.38 
  -3  -2   2  862.71   72.58 
  -3  -2   2  797.65  150.43 
   3  -2  -2 1093.31  115.11 
   3   2  -1 4649.31  182.82 
  -3   2   1 4872.47  133.91 
  -3   2   1 4891.78  173.28 
   3   2  -1 4780.60  242.63 
   3   2  -1 4966.33  176.82 
  -3   2   1 4904.22  140.70 
  -3  -2   1 4880.89  337.77 
   3  -2  -1 4861.79  194.49 
  -3  -2   1 4922.86  136.93 
   3  -2  -1 4584.91  179.23 
  -3   2   0 1015.66   94.31 
  -3   2   0  676.52   61.68 
   3   2   0  909.77  103.04 
  -3   2   0  911.95   75.70 
   3   2   0 1011.96  130.64 
  -3  -2   0  957.75   66.59 
   3  -2   0  884.96  118.77 
  -3  -2   0  721.22  145.91 
   3  -2   0  703.26   89.10 
   3   2   1 1474.83  111.74 
   3   2   1 1570.36  129.64 
  -3   2  -1 1321.98   82.97 
  -3   2  -1 1569.24  105.13 
  -3   2  -1 1619.71  101.89 
  -3  -2  -1 1553.34   74.32 
  -3  -2  -1 1606.85  239.22 
   3  -2   1 1805.28  163.69 
   3  -2   1 1536.99  130.81 
  -3   2  -2  165.12   45.28 
  -3   2  -2  241.62   61.30 
  -3   2  -2  247.21   60.07 
   3  -2   2  153.76   56.52 
  -3  -2  -2  204.66   33.48 
   3  -2   2  209.79   83.48 
  -3  -2  -2  127.95   94.70 
  -3   2  -3 7419.82  189.75 
  -3   2  -3 7243.03  229.80 
  -3   2  -3 7042.95  196.18 
   3  -2   3 6822.77  276.07 
  -3  -2  -3 7488.65  135.39 
   3  -2   3 7093.05  208.74 
  -3  -2  -3 7229.27  428.37 
  -3   2  -4  416.70   85.97 
  -3   2  -4  644.17   84.37 
  -3   2  -4  618.99   80.66 
  -3  -2  -4  581.32   40.25 
   3  -2   4  476.62   74.64 
  -3  -2  -4  654.26  171.08 
  -3   2  -5   23.66   63.19 
  -3   2  -5   22.82   55.20 
  -3   2  -5  -86.80   80.92 
  -3   2  -5   87.28   56.23 
  -3  -2  -5   76.82  106.53 
   3  -2   5  -41.98   39.86 
  -3   2  -6   30.93   90.01 
  -3   2  -6  -25.09   56.69 
  -3   2  -6   71.45   73.82 
  -3   2  -6  -60.34   58.13 
  -3  -2  -6  325.03  129.40 
  -3  -2  -6   45.95   47.47 
   3  -2   6   49.38   37.14 
  -3   2  -7  117.05  114.62 
  -3   2  -7  169.90   85.20 
  -3   2  -7  152.70   97.77 
  -3  -2  -7  223.87   61.75 
  -3   2  -9  -96.10  119.16 
  -3   2  -9    0.51  106.61 
  -3  -2  -9  -19.13   68.08 
  -3  -2  -9  115.85   95.23 
  -3  -2  -9   87.96   64.37 
  -3   2 -10  -31.34  141.86 
  -3   2 -10  -95.26  120.49 
  -3  -2 -10  361.28  127.45 
  -3  -2 -10    1.67   90.02 
  -3   2 -11 -263.56  134.35 
  -3   2 -11 -210.81  154.09 
  -3  -2 -11  550.95  158.98 
   3   3 -11  268.82  216.78 
   3   3 -11  185.52  330.20 
   3  -3 -11  311.37  151.85 
   3  -3 -11  423.93  210.83 
   3   3 -10  368.54  309.31 
   3   3 -10  238.99  206.59 
   3  -3 -10  502.72  189.50 
   3  -3 -10  608.81  165.41 
   3   3  -9  520.05  196.90 
   3   3  -9  387.54  268.16 
   3  -3  -9  666.21  162.34 
  -3  -3   9  650.46   92.28 
   3  -3  -9  497.35  166.54 
   3   3  -8  197.48  220.54 
   3   3  -8  282.28  171.90 
   3   3  -8  446.70  172.24 
   3  -3  -8   96.32  117.28 
  -3  -3   8  221.85  179.29 
   3  -3  -8   41.52   90.24 
  -3  -3   8  168.69   61.02 
   3   3  -7  279.10  210.90 
   3   3  -7  452.86  173.70 
   3   3  -7  160.23  139.67 
   3  -3  -7  347.66  103.94 
   3  -3  -7  130.34  101.96 
  -3  -3   7  281.83   65.84 
  -3  -3   7  249.31  185.80 
   3   3  -6  141.25  145.44 
   3   3  -6  100.32  123.29 
   3   3  -6  145.50  196.57 
   3  -3  -6  131.49   90.93 
  -3  -3   6  117.81  131.12 
  -3  -3   6   48.18   49.90 
   3  -3  -6  132.51   79.54 
  -3   3   5 1152.69   82.33 
   3   3  -5 1028.59  181.26 
   3   3  -5  997.47  190.38 
   3   3  -5 1280.57  269.33 
   3  -3  -5 1213.65  148.18 
  -3  -3   5  985.63  213.42 
   3  -3  -5 1271.26  147.54 
   3  -3  -5 1104.26  124.70 
  -3  -3   5 1265.73  117.96 
  -3   3   4   39.76   78.82 
   3   3  -4  100.58   94.59 
   3   3  -4   34.98  108.71 
  -3   3   4  101.53   43.55 
   3   3  -4  101.71  162.73 
   3  -3  -4  133.96   76.33 
   3  -3  -4  -16.41   50.22 
  -3  -3   4  152.22   57.56 
  -3  -3   4  125.89  111.70 
   3  -3  -4  127.14   46.42 
   3   3  -3  680.41  144.47 
   3   3  -3  493.77  183.80 
   3   3  -3  600.96  119.53 
  -3   3   3  417.18  105.82 
  -3   3   3  605.57   67.40 
   3  -3  -3  694.27  102.09 
  -3  -3   3  734.44   83.25 
   3  -3  -3  528.50   97.54 
  -3  -3   3  537.91  165.45 
  -3   3   2 2200.22  105.59 
   3   3  -2 2319.04  190.01 
  -3   3   2 2106.40  139.26 
  -3   3   2 2003.17  151.45 
   3   3  -2 2164.27  149.02 
   3   3  -2 2747.62  295.49 
   3  -3  -2 2084.62  147.86 
   3  -3  -2 2292.92  135.46 
  -3  -3   2 2143.88  123.30 
  -3  -3   2 2339.46  329.92 
  -3   3   1   57.95   38.77 
  -3   3   1  -16.61   62.50 
   3   3  -1  123.07   65.89 
   3   3  -1  -17.22   60.60 
   3   3  -1  -50.04   88.80 
  -3   3   1   39.22   71.90 
   3  -3  -1   29.63   67.03 
   3  -3  -1  135.32   60.23 
  -3  -3   1  161.84  119.95 
  -3  -3   1   40.32   44.61 
  -3   3   0 3484.92  160.10 
  -3   3   0 3495.36  136.98 
  -3   3   0 3448.07  160.05 
   3   3   0 3486.93  138.65 
   3   3   0 3429.69  207.33 
   3  -3   0 3257.93  142.02 
   3  -3   0 3342.65  194.87 
  -3  -3   0 3433.69  354.65 
  -3  -3   0 3598.54  136.11 
  -3   3  -1  595.65   76.67 
  -3   3  -1  506.30   83.32 
   3   3   1  721.67   89.47 
   3   3   1  715.62  121.93 
  -3   3  -1  532.77   87.55 
  -3  -3  -1  627.60   67.95 
  -3  -3  -1  472.11  149.64 
   3  -3   1  363.41   96.94 
   3  -3   1  489.02   89.36 
  -3   3  -2  165.18   69.40 
  -3   3  -2   79.84   51.20 
  -3   3  -2  179.82   67.57 
  -3  -3  -2   91.22   39.79 
  -3  -3  -2   26.96   89.97 
   3  -3   2  247.74   92.38 
  -3  -3  -2  161.77   28.77 
   3  -3   2   82.82   61.25 
  -3   3  -3 2405.77  141.21 
  -3   3  -3 2435.56  139.88 
  -3   3  -3 2475.72  159.23 
  -3   3  -3 2521.20  171.29 
  -3  -3  -3 2736.22  330.90 
   3  -3   3 2622.34  146.88 
   3  -3   3 2384.57  184.70 
  -3  -3  -3 2407.77   93.67 
  -3  -3  -3 2584.89   94.07 
  -3   3  -4  408.46   99.00 
  -3   3  -4  452.96  127.52 
  -3   3  -4  256.01   76.73 
  -3   3  -4  417.34   85.11 
  -3  -3  -4  407.47   56.48 
   3  -3   4  465.68   82.99 
  -3  -3  -4  629.61   71.67 
   3  -3   4  334.73  107.48 
  -3  -3  -4  403.17  162.05 
  -3   3  -5  168.81   78.06 
  -3   3  -5  190.67  107.00 
  -3   3  -5  239.04   83.73 
  -3   3  -5  242.76   94.51 
   3  -3   5   96.52   60.41 
  -3  -3  -5   94.50  156.09 
  -3   3  -6  323.52  111.11 
  -3   3  -6  434.73  146.56 
  -3   3  -6  649.08  122.90 
  -3   3  -6  589.01  104.75 
   3  -3   6  543.12   91.22 
  -3  -3  -6  728.82  229.70 
  -3   3  -7 1009.48  172.40 
  -3   3  -7  940.56  206.92 
  -3   3  -7  791.53  123.58 
   3  -3   7  931.64   93.97 
  -3   3  -8  996.53  179.19 
  -3   3  -8 1732.53  287.67 
  -3  -3  -8 1391.92  147.52 
  -3   3  -9  705.64  183.92 
  -3   3  -9  626.48  203.80 
  -3  -3  -9 1507.32  199.60 
  -3  -3  -9 1259.45  148.00 
  -3  -3  -9 1183.01  162.42 
  -3   3 -10 -100.33  153.24 
  -3   3 -10   59.11  153.61 
  -3  -3 -10   72.94   97.64 
  -3  -3 -10  579.73  154.24 
  -3  -3 -10  618.53  128.93 
  -3  -3 -10  426.21  110.61 
   3   4 -10  -61.77  291.58 
   3   4 -10  180.00  173.95 
   3  -4 -10  -68.81  108.14 
   3  -4 -10  -94.40  139.69 
   3   4  -9   62.08  165.19 
   3   4  -9   58.44  252.86 
   3   4  -9  260.27  185.43 
   3  -4  -9  191.91  118.75 
   3  -4  -9  267.18  145.23 
  -3  -4   9  700.02  270.38 
  -3  -4   9  192.91   79.40 
   3   4  -8  679.13  208.02 
   3   4  -8  827.35  212.30 
   3   4  -8  528.37  274.54 
  -3  -4   8  630.73  104.60 
  -3  -4   8  722.89  273.66 
   3  -4  -8  558.39  149.85 
   3  -4  -8  699.67  151.48 
   3   4  -7  606.53  258.72 
   3   4  -7  698.59  193.03 
   3   4  -7  551.66  174.53 
  -3  -4   7  698.80  109.57 
   3  -4  -7  761.10  151.96 
   3  -4  -7  737.08  141.64 
  -3  -4   7 1199.77  301.80 
   3   4  -6   82.09  192.65 
   3   4  -6    2.04  116.49 
   3   4  -6  250.96  151.38 
  -3  -4   6   81.01  164.05 
  -3  -4   6   22.07   60.55 
   3  -4  -6   33.42   76.58 
   3  -4  -6   73.44   90.13 
   3   4  -5  285.73  206.29 
   3   4  -5   51.13  136.04 
   3   4  -5  176.50  115.58 
   3  -4  -5  155.66   81.43 
  -3  -4   5   23.63   65.58 
  -3  -4   5 -179.16  147.59 
   3  -4  -5   -1.36   77.65 
   3   4  -4 1326.98  210.15 
   3   4  -4 1263.18  169.21 
   3   4  -4 1316.92  258.45 
  -3   4   4 1130.77  104.21 
  -3   4   4 1169.02  168.33 
  -3  -4   4 1145.51  127.89 
   3  -4  -4 1608.14  166.11 
  -3  -4   4 1138.95  271.18 
   3  -4  -4 1414.21  141.07 
   3   4  -3  269.16  178.99 
  -3   4   3  142.17   97.06 
   3   4  -3   20.00   83.59 
  -3   4   3  152.73   60.53 
   3   4  -3  105.08  122.23 
  -3   4   3  225.24   65.90 
  -3  -4   3   91.88   71.91 
  -3  -4   3  133.80  170.29 
   3  -4  -3   89.49   81.77 
   3  -4  -3  199.95   79.23 
   3   4  -2   17.34   96.04 
  -3   4   2   75.69   53.79 
   3   4  -2   38.99  137.31 
   3   4  -2   96.15   72.20 
  -3   4   2   -6.14   74.96 
  -3   4   2  -55.24   75.69 
   3  -4  -2   -2.57   56.01 
  -3  -4   2   25.39   57.41 
  -3  -4   2  -15.64  130.26 
   3  -4  -2   16.34   75.38 
  -3   4   1  115.85   58.69 
  -3   4   1  160.27   92.49 
   3   4  -1  183.36   67.06 
   3   4  -1  135.31   90.53 
   3   4  -1  203.39  123.24 
  -3   4   1  210.66   86.52 
  -3  -4   1  264.91  157.26 
   3  -4  -1  170.62   57.17 
   3  -4  -1  241.66   93.49 
  -3  -4   1  105.17   61.46 
   3   4   0   83.31   82.18 
  -3   4   0   25.27   42.02 
  -3   4   0   36.96   72.32 
   3   4   0   73.92   40.44 
   3   4   0   17.28   91.26 
  -3   4   0   31.09   95.06 
  -3   4   0   28.54   53.36 
   3  -4   0   59.64   89.38 
  -3  -4   0  115.77   57.95 
  -3  -4   0   31.54  111.60 
   3  -4   0  141.77   55.64 
  -3   4  -1 1184.31  145.24 
  -3   4  -1  566.53   88.34 
  -3   4  -1  616.36   95.29 
   3   4   1  464.83  121.49 
  -3   4  -1  453.84   97.67 
  -3  -4  -1  424.08  152.05 
   3  -4   1  733.15  104.12 
  -3  -4  -1  448.67   76.67 
   3  -4   1  496.78  120.57 
   3  -4   1  508.05  126.82 
  -3   4  -2  596.98  110.11 
  -3   4  -2  539.78  117.34 
  -3   4  -2  623.32  107.30 
  -3   4  -2  613.33  101.39 
   3  -4   2  613.66  134.75 
   3  -4   2  602.73   98.10 
  -3  -4  -2  580.02  182.55 
  -3  -4  -2  548.74   74.36 
   3  -4   2  508.70  124.48 
  -3  -4  -2  620.09   61.12 
  -3   4  -3  305.30   94.29 
  -3   4  -3  277.10   82.16 
  -3   4  -3  273.76  102.45 
  -3   4  -3  238.27  104.09 
  -3  -4  -3  120.36  120.03 
   3  -4   3  103.31   98.09 
  -3  -4  -3  132.33   49.67 
  -3  -4  -3  215.18   47.93 
   3  -4   3  311.60  110.18 
   3  -4   3  142.16   64.72 
  -3   4  -4  162.54   85.35 
  -3   4  -4   51.06   97.49 
  -3   4  -4   91.88   80.80 
  -3   4  -4  -19.30   86.97 
   3  -4   4  -22.08   58.56 
  -3  -4  -4   11.09   36.71 
   3  -4   4   67.12   81.40 
  -3  -4  -4   65.03  130.59 
  -3   4  -5 1888.55  238.39 
  -3   4  -5 1663.65  155.76 
  -3   4  -5 1770.63  188.39 
  -3   4  -5 1779.33  209.58 
   3  -4   5 1783.12  152.35 
  -3  -4  -5 1982.88  372.10 
  -3  -4  -5 1753.04  118.76 
  -3   4  -6 2741.75  186.40 
  -3   4  -6 2265.10  237.55 
  -3   4  -6 2546.59  248.16 
   3  -4   6 2996.25  182.57 
  -3  -4  -6 2895.76  426.37 
  -3  -4  -6 3054.25  170.52 
  -3   4  -7 1007.51  197.01 
  -3   4  -7  960.12  137.81 
  -3   4  -7 1054.50  210.16 
   3  -4   7  858.75  113.05 
  -3  -4  -7  848.46  131.28 
  -3   4  -8  173.43  161.91 
  -3  -4  -8  874.91  205.75 
  -3   4 -10   35.59  184.34 
  -3   4 -10   45.36  174.62 
   3  -5 -10   29.41  127.09 
   3   5  -9  367.27  196.03 
   3   5  -9 -146.04  253.43 
   3   5  -9  -85.40  156.42 
  -3  -5   9  -68.08   71.40 
   3  -5  -9  101.03  120.67 
  -3  -5   9  264.15  264.49 
   3   5  -8  -90.45  125.12 
   3   5  -8  172.55  245.16 
   3   5  -8  141.58  162.69 
  -3  -5   8  590.08  263.87 
   3  -5  -8  -17.58   93.66 
  -3  -5   8  108.08   80.50 
   3   5  -7  564.40  177.93 
   3   5  -7  837.26  212.24 
   3   5  -7  513.31  254.08 
   3  -5  -7  366.40  134.49 
   3  -5  -7  482.10  136.84 
  -3  -5   7  564.93  121.52 
  -3  -5   7 1180.75  328.34 
   3   5  -6  557.04  248.95 
   3   5  -6  283.16  132.53 
   3   5  -6  225.28  149.92 
  -3  -5   6  579.12  296.36 
  -3  -5   6  475.91  119.63 
   3  -5  -6  256.41  109.94 
   3  -5  -6  448.04  128.92 
   3   5  -5 -123.97   84.21 
   3   5  -5 -218.10  103.02 
   3   5  -5  212.01  191.61 
  -3  -5   5  -38.80  226.94 
   3  -5  -5  -65.65   74.69 
  -3  -5   5   29.66   77.84 
   3  -5  -5    2.30   78.74 
   3   5  -4  178.31  110.42 
   3   5  -4  237.67  187.94 
   3   5  -4  258.57  151.96 
  -3  -5   4  368.75  110.22 
  -3  -5   4  272.20  258.29 
   3  -5  -4  216.87   91.46 
   3  -5  -4  198.84  109.75 
   3   5  -3 1248.06  211.89 
  -3   5   3 1695.19  147.83 
   3   5  -3 1847.74  168.48 
   3   5  -3 1690.93  274.48 
  -3   5   3 1919.46  211.46 
   3  -5  -3 1315.65  169.87 
   3  -5  -3 1664.04  128.72 
  -3  -5   3 1340.61  318.18 
  -3  -5   3 1973.97  180.65 
   3   5  -2  762.41  181.14 
  -3   5   2  752.85  146.92 
   3   5  -2  629.98  192.47 
  -3   5   2  465.44   93.70 
   3   5  -2  696.79  100.97 
  -3   5   2  544.40  117.19 
  -3  -5   2  547.86  109.38 
   3  -5  -2  525.55  120.27 
  -3  -5   2  606.09  223.51 
   3  -5  -2  710.70   89.81 
  -3   5   1  -16.42   85.19 
   3   5  -1  -45.55  104.59 
  -3   5   1  176.77   77.10 
  -3   5   1  152.88  116.76 
   3   5  -1 -131.95  114.37 
  -3  -5   1   85.23   73.09 
  -3  -5   1  -31.65  126.76 
   3  -5  -1    7.28   49.27 
   3  -5  -1  -29.73   87.97 
   3   5   0  747.46  162.17 
  -3   5   0  580.91  123.12 
  -3   5   0  432.21  138.35 
   3   5   0  706.68  155.97 
  -3   5   0  578.21  103.39 
  -3   5   0  783.57  105.82 
   3  -5   0  779.31  192.41 
   3  -5   0  702.35  111.15 
   3  -5   0  706.80  139.88 
  -3  -5   0  617.69   99.98 
  -3  -5   0  522.60  191.59 
  -3   5  -1 2476.47  173.57 
  -3   5  -1 2863.12  194.85 
  -3   5  -1 2683.97  245.57 
  -3   5  -1 2652.24  165.66 
   3   5   1 2811.72  222.30 
   3  -5   1 3018.37  326.96 
   3  -5   1 2345.62  198.46 
  -3  -5  -1 2936.01  403.20 
   3  -5   1 2932.45  188.99 
  -3  -5  -1 2770.39  156.26 
  -3   5  -2  803.49  129.87 
  -3   5  -2  620.34  125.82 
  -3   5  -2  773.92  162.69 
  -3   5  -2  732.29  129.88 
   3  -5   2  769.59  143.42 
   3  -5   2  762.69  112.20 
  -3  -5  -2  741.28   95.29 
   3  -5   2  909.02  204.74 
  -3  -5  -2  603.74  201.62 
  -3   5  -3  -23.60   77.17 
  -3   5  -3  -41.74   71.23 
  -3   5  -3   19.80   80.88 
  -3   5  -3  349.39  155.50 
   3  -5   3   79.82  157.24 
   3  -5   3   47.62   64.18 
   3  -5   3  -70.48   80.49 
  -3  -5  -3   19.92  125.40 
  -3  -5  -3   23.59   49.08 
  -3   5  -4 1455.22  200.29 
  -3   5  -4  704.75  130.41 
  -3   5  -4  893.95  145.42 
  -3   5  -4  803.49  179.74 
  -3  -5  -4 1133.02  285.46 
   3  -5   4  878.02  118.09 
   3  -5   4  875.54  155.73 
  -3   5  -5  517.47  119.66 
  -3   5  -5  507.05  167.87 
  -3   5  -5  635.91  162.69 
  -3  -5  -5  620.71  271.42 
   3  -5   5  593.82  104.26 
  -3   5  -6  338.84  110.52 
  -3   5  -6  -65.25  141.03 
  -3   5  -6  106.17  122.30 
  -3  -5  -6  363.28  243.06 
   3  -5   6   38.49   76.15 
  -3   5  -7  235.45  175.35 
  -3   5  -7   42.92   95.06 
  -3   5  -7  125.61  144.97 
   3  -5   7   16.42   65.90 
  -3   5  -8  197.06  177.31 
  -3   5  -8  236.85  191.93 
   3   6  -9 -126.86  159.42 
   3   6  -9 -379.85  241.79 
   3   6  -9  108.79  165.04 
  -3  -6   9  925.11  541.75 
  -3  -6   9  145.51  101.88 
   3  -6  -9    4.55  147.86 
   3   6  -8 -102.66  233.71 
   3   6  -8  104.18  166.12 
   3   6  -8  -74.12  130.29 
  -3  -6   8  873.20  320.67 
   3  -6  -8 -175.81  108.64 
  -3  -6   8   -4.64   93.97 
   3   6  -7  576.35  202.13 
   3   6  -7  333.31  254.49 
   3   6  -7  272.84  148.72 
  -3  -6   7  376.73  129.97 
   3  -6  -7  251.80  139.61 
  -3  -6   7 1054.29  374.80 
   3   6  -6  644.72  168.90 
   3   6  -6  463.50  172.62 
   3   6  -6  540.61  252.23 
   3  -6  -6  897.10  176.66 
  -3  -6   6  658.65  140.42 
  -3  -6   6 1336.05  429.99 
   3   6  -5  420.90  226.68 
   3   6  -5  684.40  195.32 
  -3  -6   5  515.68  132.62 
   3  -6  -5  606.02  150.86 
  -3  -6   5 1008.25  432.25 
   3   6  -4  349.36  191.80 
   3   6  -4   59.16  135.34 
  -3  -6   4  413.77  123.60 
  -3  -6   4  -58.95  302.61 
   3  -6  -4   91.16  110.01 
   3   6  -3  207.05  163.23 
   3   6  -3  209.46  151.86 
  -3   6   3  319.68  101.08 
  -3  -6   3  228.98  281.68 
  -3  -6   3  320.46  108.50 
   3  -6  -3  404.35  129.71 
   3   6  -2 2086.39  272.18 
   3   6  -2 2723.76  311.40 
  -3   6   2 1558.74  194.03 
  -3   6   2 2119.14  232.98 
   3  -6  -2 2575.96  240.50 
  -3  -6   2 2013.61  377.95 
  -3  -6   2 2524.08  189.50 
  -3   6   1    3.40  105.23 
   3   6  -1    6.96  115.53 
   3   6  -1  -11.05  115.19 
  -3   6   1  191.73  103.40 
   3  -6  -1   -8.14   76.05 
   3  -6  -1  136.30  168.50 
  -3  -6   1  139.31   80.92 
   3  -6  -1    5.46  101.35 
  -3  -6   1  126.65  174.25 
   3   6   0 2132.48  245.64 
  -3   6   0 1445.18  183.63 
  -3   6   0 1455.39  214.26 
   3   6   0 1904.22  247.34 
   3  -6   0 1728.92  170.53 
  -3  -6   0 1610.68  154.13 
   3  -6   0 2275.84  367.22 
  -3  -6   0 1490.15  298.12 
   3  -6   0 2186.01  210.77 
   3   6   1  332.54  125.50 
  -3   6  -1  268.05  111.46 
  -3   6  -1  234.58  144.52 
   3  -6   1  400.98  205.32 
  -3  -6  -1  213.63   79.45 
  -3  -6  -1  225.22  168.70 
   3  -6   1  347.33   94.62 
   3  -6   1  276.16  112.41 
  -3   6  -2  412.29  124.63 
  -3   6  -2  356.18  152.30 
  -3   6  -2  514.69  142.23 
   3  -6   2  377.27  216.60 
   3  -6   2  450.38  101.47 
  -3  -6  -2  455.09   86.25 
  -3  -6  -2  367.53  191.91 
   3  -6   2  372.88  114.03 
  -3   6  -3 1152.75  165.62 
  -3   6  -3 1158.18  214.43 
  -3   6  -3 1183.70  192.49 
   3  -6   3 1530.65  156.64 
  -3  -6  -3 1273.58  315.57 
   3  -6   3 1333.16  179.80 
  -3   6  -4 1390.64  220.58 
  -3   6  -4 1279.21  236.66 
  -3   6  -4 1229.69  168.74 
   3  -6   4 1337.52  147.75 
  -3  -6  -4 1144.93  333.33 
   3  -6   4 1124.01  180.90 
  -3   6  -5  269.54  150.96 
  -3   6  -5  261.67  108.96 
  -3   6  -5  140.30  165.91 
   3  -6   5   58.53   70.86 
  -3  -6  -5  229.79  240.90 
  -3   6  -6  -87.04  125.38 
  -3   6  -6  218.26  101.61 
  -3   6  -6   13.80  178.77 
  -3  -6  -6  316.69  255.17 
   3  -6   6 -140.53   58.37 
  -3   6  -7 -114.51  129.91 
  -3   6  -7  -92.08  173.48 
   3  -6   7  218.21  103.09 
  -3   6  -8   44.35  175.22 
  -3   6  -8  -24.21  204.67 
   3   7  -8  547.85  187.08 
   3   7  -8  -28.48  241.69 
  -3  -7   8  136.91  120.61 
  -3  -7   8 1566.05  363.33 
   3  -7  -8   -8.90  153.28 
   3   7  -7 -113.26  209.18 
   3   7  -7  342.87  173.65 
   3  -7  -7 -288.22  117.12 
  -3  -7   7 1048.93  386.11 
  -3  -7   7   55.16  107.57 
   3   7  -6  394.74  242.87 
   3   7  -6  214.19  176.58 
   3  -7  -6  287.58  153.01 
  -3  -7   6  352.84  119.82 
  -3  -7   6 1193.11  440.71 
   3   7  -5  120.92  181.29 
   3   7  -5  394.12  183.99 
   3  -7  -5  338.87  141.99 
  -3  -7   5  440.24  134.15 
  -3  -7   5  273.09  487.18 
   3   7  -4  326.29  194.34 
   3   7  -4  208.05  140.24 
   3  -7  -4  420.23  146.65 
   3  -7  -4  302.66  119.02 
  -3  -7   4  348.03  118.99 
  -3  -7   4  490.82  461.62 
   3   7  -3  637.50  191.13 
   3   7  -3  353.82  160.07 
   3  -7  -3  398.50  152.84 
  -3  -7   3  350.27  373.77 
   3  -7  -3  563.31  132.62 
  -3  -7   3  545.00  122.04 
   3   7  -2  195.78  158.34 
  -3   7   2  565.31  158.94 
   3   7  -2  463.17  166.64 
  -3   7   2  487.74  132.14 
   3  -7  -2  769.89  287.85 
  -3  -7   2  433.42  321.16 
   3  -7  -2  377.68  137.33 
   3  -7  -2  456.38  126.08 
  -3  -7   2  261.55  102.13 
  -3   7   1  126.51  112.64 
   3   7  -1   79.86  106.64 
   3   7  -1   93.02  122.59 
  -3   7   1  131.35  111.62 
  -3  -7   1   34.49  229.97 
   3  -7  -1  379.90  231.83 
  -3  -7   1   24.15   71.02 
   3  -7  -1   11.13   82.99 
   3  -7  -1  -78.39   99.04 
   3   7   0  633.93  159.12 
  -3   7   0  485.78  140.76 
   3   7   0  486.62  172.91 
  -3   7   0  627.95  166.70 
  -3  -7   0  552.22  257.10 
   3  -7   0  596.08  122.94 
   3  -7   0  527.29  254.15 
  -3  -7   0  458.48  102.44 
   3  -7   0  483.64  132.79 
  -3   7  -1  408.32  140.96 
  -3   7  -1  497.11  174.79 
   3   7   1  437.08  140.91 
  -3  -7  -1  608.54  106.80 
   3  -7   1  633.34  140.96 
   3  -7   1  713.05  262.27 
   3  -7   1  645.72  117.57 
  -3  -7  -1  606.35  263.46 
  -3   7  -2  204.39  117.26 
  -3   7  -2  413.57  175.88 
   3  -7   2  375.09  106.42 
   3  -7   2  240.06  264.82 
  -3  -7  -2  306.31  239.86 
  -3  -7  -2  301.85   82.29 
   3  -7   2  248.16  104.08 
  -3   7  -3  147.87  160.52 
  -3   7  -3  505.47  140.14 
   3  -7   3  366.89  120.89 
   3  -7   3   73.04   76.62 
  -3  -7  -3  454.22  277.04 
  -3   7  -4  585.88  229.09 
  -3   7  -4  694.28  152.56 
  -3   7  -4  426.25  182.47 
   3  -7   4  486.70  127.92 
   3  -7   4  487.36  104.33 
  -3  -7  -4  767.48  351.57 
  -3   7  -5   60.25  109.25 
  -3   7  -5 -144.64  140.90 
  -3   7  -5   94.35  184.57 
  -3  -7  -5   16.87  255.06 
   3  -7   5  120.48   78.51 
  -3   7  -6  140.80  104.70 
  -3   7  -6  -10.98  175.17 
  -3   7  -6  153.68  220.89 
  -3  -7  -6  281.68  313.02 
   3  -7   6  239.82   93.27 
  -3   7  -7  -90.49  183.01 
  -3   7  -7 -518.74  183.19 
  -3  -7  -7 1051.96  341.15 
   3  -7   7   86.95   89.66 
   3   8  -6  278.83  172.23 
   3   8  -6  117.61  202.21 
  -3  -8   6   60.05  111.82 
  -3  -8   6  735.09  464.74 
   3  -8  -6  -24.25  150.93 
   3   8  -5  490.59  205.55 
   3   8  -5  429.86  175.64 
  -3  -8   5  635.70  518.67 
   3  -8  -5 -179.35  123.39 
  -3  -8   5  265.84  130.19 
   3   8  -4  441.50  186.10 
   3   8  -4  578.79  204.34 
   3  -8  -4  380.89  169.38 
  -3  -8   4  666.22  522.91 
  -3  -8   4  127.52  107.75 
   3   8  -3  200.65  153.91 
   3   8  -3  130.11  140.99 
  -3  -8   3  198.69  102.15 
   3  -8  -3   -7.82  103.72 
   3  -8  -3 -154.61  116.72 
  -3  -8   3 -154.72  429.57 
   3   8  -2  168.73  146.94 
   3   8  -2  164.94  131.42 
  -3   8   2  183.51  115.02 
   3  -8  -2  762.18  272.91 
   3  -8  -2  181.03  101.92 
  -3  -8   2   80.69  382.90 
   3  -8  -2   61.91  122.96 
  -3  -8   2  238.93   97.16 
   3   8  -1   77.08  128.56 
   3   8  -1   57.84  138.71 
  -3   8   1  172.22  113.14 
   3  -8  -1  347.52  230.60 
  -3  -8   1   81.74   83.83 
   3  -8  -1  -28.27   83.42 
   3  -8  -1   59.83  109.56 
  -3  -8   1 -310.61  310.47 
  -3   8   0  118.39  122.04 
  -3   8   0  235.15  130.12 
   3  -8   0  302.54  247.54 
   3  -8   0   21.56   77.47 
   3  -8   0   77.57  106.32 
  -3  -8   0 -141.64  279.66 
  -3  -8   0  213.07   88.63 
  -3   8  -1  207.16  162.57 
  -3   8  -1  182.26  119.41 
  -3  -8  -1  251.51   89.21 
   3  -8   1  219.98  270.14 
  -3  -8  -1   88.50  291.76 
   3  -8   1  250.19  106.84 
   3  -8   1  214.02  105.83 
  -3   8  -2 -102.35  104.05 
  -3   8  -2   41.95  153.26 
   3  -8   2  -26.92   75.71 
  -3  -8  -2 -155.76  244.46 
   3  -8   2  -41.70   72.96 
  -3   8  -3  104.15  117.77 
  -3   8  -3  -69.09  165.65 
  -3  -8  -3  214.78  307.12 
   3  -8   3  288.64   98.50 
   3  -8   3  377.01  120.31 
  -3   8  -4  436.99  151.20 
  -3   8  -4 -188.66  172.81 
   3  -8   4  178.83   92.02 
  -3  -8  -4   28.80  345.03 
   3  -8   4  235.95  112.61 
  -3   8  -5 1216.67  202.11 
  -3   8  -5  684.00  254.81 
  -3  -8  -5 1601.84  516.45 
   3  -8   5 1083.62  157.37 
  -3   8  -6  175.22  216.96 
  -3   8  -6  339.15  142.04 
  -3  -8  -6  992.87  382.90 
   3  -8   6 -142.15   73.47 
   3  -9  -4  183.56  172.97 
  -3  -9   4   -8.74  513.62 
   3   9  -3  543.67  202.81 
   3  -9  -3  768.35  192.80 
   3  -9  -3  991.51  174.89 
  -3  -9   3  943.40  159.70 
  -3  -9   3  918.24  541.61 
   3   9  -2  107.11  133.79 
  -3  -9   2 -308.54  456.52 
   3  -9  -2  -26.51  100.08 
   3  -9  -2   49.91  125.31 
  -3  -9   2   46.94   89.23 
  -3   9   1  240.30  133.72 
   3  -9  -1   79.10  105.32 
   3  -9  -1  234.68  115.62 
  -3  -9   1 -431.26  407.06 
   3  -9  -1  825.05  289.81 
  -3  -9   1   87.99   87.17 
  -3   9   0  197.89  151.23 
   3  -9   0   34.73   94.06 
   3  -9   0   25.08  255.31 
   3  -9   0   46.24  100.51 
  -3  -9   0    4.77   82.98 
  -3  -9   0 -745.61  353.78 
  -3   9  -1 1364.34  239.93 
  -3  -9  -1 1384.51  165.53 
   3  -9   1 1358.82  181.04 
  -3  -9  -1 1138.15  491.91 
   3  -9   1 1335.40  187.62 
  -3   9  -2 -116.69  106.56 
  -3   9  -2  196.59  153.16 
   3  -9   2  132.87   88.10 
   3  -9   2  -80.92   79.46 
  -3  -9  -2  141.64  368.30 
  -3   9  -3  389.02  185.16 
  -3   9  -3  289.70  143.97 
   3  -9   3   78.35   95.98 
   3  -9   3   45.54   91.58 
  -3  -9  -3 -175.37  383.23 
   4   0 -11  -83.08  170.55 
   4   0 -11   38.11   91.60 
   4   0 -11 -382.23  314.53 
   4   0 -10  280.71  306.53 
   4   0 -10  133.46  100.00 
   4   0 -10   41.67  164.70 
   4   0  -9  -51.24   66.97 
   4   0  -9  161.09  158.81 
   4   0  -9 -583.42  203.18 
   4   0  -8   35.72  119.57 
   4   0  -8  168.26   83.19 
   4   0  -8 -195.54  205.92 
   4   0  -7  -41.80   53.94 
   4   0  -7   26.17  204.52 
  -4   0   7   31.57   36.40 
   4   0  -7  192.76  134.46 
  -4   0   6  168.59   47.03 
   4   0  -6  198.66  187.56 
   4   0  -6   93.19   72.18 
   4   0  -6  111.34  119.23 
   4   0  -5  147.50  162.87 
  -4   0   5   22.14   31.96 
  -4   0   5   28.61   65.47 
   4   0  -5   -5.26   51.40 
   4   0  -5  177.19  101.17 
  -4   0   4 9498.59  197.47 
   4   0  -4 9115.76  263.13 
   4   0  -4 9479.16  382.04 
   4   0  -4 8515.93  316.23 
  -4   0   4 9584.90  427.82 
  -4   0   4 9265.80  180.36 
  -4   0   3   71.77   41.79 
   4   0  -3   31.65   76.96 
  -4   0   3   73.40   31.67 
   4   0  -3   73.21   45.69 
  -4   0   3   45.91   51.86 
   4   0  -3  127.87  102.34 
   4   0  -2  287.42   91.16 
  -4   0   2  127.11   63.57 
   4   0  -2  106.85   80.84 
   4   0  -2  265.89   59.04 
  -4   0   2  168.59   36.63 
  -4   0   2  185.74   42.98 
  -4   0   1   12.94   25.64 
   4   0  -1    5.78   47.33 
   4   0  -1  -35.41   72.98 
   4   0  -1   -2.52   54.25 
  -4   0   1  -14.33   38.45 
  -4   0   1   25.27   32.88 
   4   0   0 2599.01  148.90 
   4   0   0 2358.64  158.30 
  -4   0   0 2538.79   97.13 
  -4   0   0 2449.05   87.14 
  -4   0   0 2511.88  167.64 
   4   0   1   40.46   57.78 
  -4   0  -1   17.16   23.69 
  -4   0  -1  -26.62   39.91 
   4   0   1  -43.35   59.77 
  -4   0  -1   11.60   29.93 
   4   0   2 4548.93  221.23 
  -4   0  -2 4839.58  195.14 
   4   0   2 4640.59  170.75 
  -4   0  -2 4838.02  121.51 
  -4   0  -2 4879.01  148.86 
   4   0   3  -23.90   36.79 
  -4   0  -3   15.35   23.75 
  -4   0  -3   20.23   33.91 
  -4   0  -4 1261.40  110.18 
  -4   0  -4 1278.21   67.39 
  -4   0  -4 1398.14   96.56 
  -4   0  -5   15.60   39.27 
  -4   0  -5   39.03   30.73 
  -4   0  -5   15.24   52.78 
  -4   0  -6  228.32   61.28 
  -4   0  -6   89.59   64.37 
  -4   0  -7   69.70   70.30 
  -4   0  -7   12.54   45.82 
  -4   0  -8  194.37   73.67 
  -4   0  -8  238.63   94.62 
  -4   0  -9  -11.83   96.04 
  -4   0  -9  -83.68   74.46 
  -4   0  -9  -89.72   60.89 
  -4   0 -10  -69.33   94.46 
  -4   0 -10  163.66  132.34 
   4   1 -11  363.22  235.58 
   4   1 -11  384.86  118.71 
   4   1 -11   37.92  345.83 
   4  -1 -11  193.48  125.42 
   4  -1 -11    4.42  176.73 
   4   1 -10  307.54  191.26 
   4   1 -10 -182.77  266.66 
   4  -1 -10  116.54  282.51 
   4  -1 -10  234.87  111.38 
   4  -1 -10  175.66  174.81 
   4   1  -9  167.05  169.17 
   4   1  -9  484.29  299.55 
   4  -1  -9   89.63  245.91 
   4  -1  -9  144.29  156.94 
   4  -1  -9  451.90  130.84 
   4   1  -8 1657.58  361.42 
   4   1  -8 1739.75  269.93 
   4  -1  -8 2512.91  291.13 
   4  -1  -8 1814.18  199.86 
  -4  -1   8 2292.77  115.89 
   4  -1  -8 1990.58  329.49 
   4   1  -7  571.58  176.95 
  -4   1   7  667.67   65.53 
   4   1  -7  269.03  250.45 
  -4  -1   7  802.96   78.89 
   4  -1  -7  802.04  229.73 
   4  -1  -7  769.87  171.27 
   4  -1  -7  620.02  125.50 
   4   1  -6  -25.71  195.55 
  -4   1   6   19.15   36.46 
   4   1  -6   80.18   76.80 
   4   1  -6  -29.35  111.10 
  -4  -1   6  -13.97   71.30 
   4  -1  -6  -70.08   52.29 
  -4  -1   6  -32.62   34.42 
   4  -1  -6   34.53  156.36 
   4  -1  -6  -25.35   86.72 
   4   1  -5  858.77  239.41 
   4   1  -5  803.78  103.50 
   4   1  -5  431.75  135.14 
  -4   1   5  611.42   64.06 
  -4  -1   5  514.42  130.74 
   4  -1  -5  673.78  171.76 
  -4  -1   5  632.51   67.62 
   4  -1  -5  473.25  116.03 
   4  -1  -5  548.54   99.08 
   4   1  -4  351.31  175.05 
   4   1  -4  400.06   71.21 
   4   1  -4  579.98  129.30 
  -4   1   4  445.31   76.56 
  -4   1   4  482.71   56.11 
   4  -1  -4  483.24   86.92 
  -4  -1   4  473.82   60.19 
  -4  -1   4  400.23  109.85 
   4  -1  -4  579.82  113.45 
   4  -1  -4  647.90  137.25 
   4   1  -3  359.22  146.25 
  -4   1   3   45.56   52.44 
   4   1  -3  128.05   87.54 
   4   1  -3  162.72   49.30 
  -4   1   3   94.84   36.79 
  -4  -1   3  123.98   71.96 
  -4  -1   3  190.69   41.95 
  -4  -1   3  139.44   31.71 
   4  -1  -3  114.76   73.81 
   4  -1  -3  172.43   79.67 
   4  -1  -3  137.65   55.50 
   4   1  -2  492.73  125.19 
  -4   1   2  536.48   39.96 
   4   1  -2  515.09   64.09 
  -4   1   2  519.45   74.06 
   4   1  -2  504.97  105.91 
  -4   1   2  550.84   59.73 
  -4  -1   2  516.51   50.14 
  -4  -1   2  341.49   92.20 
   4  -1  -2  635.20   92.72 
   4  -1  -2  586.15   86.17 
  -4  -1   2  538.00   55.99 
   4  -1  -2  592.32  105.22 
  -4   1   1 6401.74  171.70 
  -4   1   1 6199.11  153.69 
   4   1  -1 6091.08  246.09 
  -4   1   1 6304.89  138.62 
   4   1  -1 6009.76  236.35 
   4   1  -1 6285.25  166.79 
  -4  -1   1 6092.85  143.24 
  -4  -1   1 5961.76  312.60 
  -4  -1   1 6164.05  149.28 
   4  -1  -1 5941.81  218.10 
   4  -1  -1 5855.75  228.51 
   4  -1  -1 6115.76  188.75 
   4   1   0  225.87   86.96 
  -4   1   0  240.87   47.18 
   4   1   0  213.87   77.44 
   4   1   0  149.87   56.34 
  -4   1   0  160.96   48.31 
  -4   1   0  210.45   53.35 
  -4   1   0  278.12   45.92 
  -4  -1   0  148.66   37.87 
   4  -1   0  223.31   82.63 
   4  -1   0  304.48   95.38 
  -4  -1   0  177.25   85.27 
  -4  -1   0  220.16   38.08 
   4   1   1  587.32  106.21 
  -4   1  -1  582.26   68.39 
  -4   1  -1  623.67   69.23 
  -4   1  -1  516.42   52.11 
   4   1   1  676.48   63.06 
  -4  -1  -1  549.95   50.03 
  -4  -1  -1  478.83   57.62 
   4  -1   1  561.41  101.93 
  -4  -1  -1  406.74   98.13 
   4  -1   1  629.34  107.94 
  -4   1  -2  488.98   64.52 
  -4   1  -2  501.00   53.85 
  -4   1  -2  652.89   79.63 
  -4  -1  -2  595.78   49.92 
  -4  -1  -2  627.94  114.85 
   4  -1   2  632.98  102.29 
  -4  -1  -2  485.63   60.69 
  -4   1  -3  359.42   51.81 
  -4   1  -3  159.73   51.77 
  -4   1  -3  300.80   68.08 
   4  -1   3  344.48   64.11 
  -4  -1  -3  224.00   96.32 
  -4  -1  -3  261.55   52.44 
  -4  -1  -3  365.17   39.85 
   4  -1   3  249.52   76.45 
  -4   1  -4 1088.72  101.85 
  -4   1  -4 1208.87   82.48 
  -4   1  -4 1388.96  131.90 
  -4  -1  -4  984.15  169.65 
  -4  -1  -4 1273.95   92.51 
   4  -1   4 1250.81   95.83 
  -4  -1  -4 1070.24   56.95 
  -4   1  -5  123.92   56.14 
  -4   1  -5  183.05   71.82 
  -4   1  -5  206.16   49.65 
   4  -1   5   90.86   32.45 
  -4  -1  -5   56.92   99.15 
  -4  -1  -5   94.87   48.27 
  -4   1  -6  662.14  116.52 
  -4   1  -6  582.12   79.48 
  -4   1  -6  582.28   88.24 
  -4  -1  -6  444.03   75.40 
  -4  -1  -6  560.82  159.39 
  -4  -1  -6  504.93  100.42 
  -4   1  -7   82.38   73.20 
  -4   1  -7   89.11   64.44 
  -4  -1  -7  144.93   57.47 
  -4  -1  -7   95.85   76.38 
  -4   1  -8   66.73   70.60 
  -4   1  -8  257.06  134.46 
  -4   1  -8  -31.54   79.37 
  -4  -1  -8  -32.06   61.37 
  -4  -1  -8   35.56   59.05 
  -4   1  -9  290.33  126.07 
  -4   1  -9  342.43  161.11 
  -4  -1  -9   94.97   94.32 
  -4  -1  -9  224.96  113.05 
  -4  -1  -9  108.11   73.09 
  -4   1 -10  318.98  139.35 
  -4   1 -10  434.39  187.99 
  -4  -1 -10  293.87  130.22 
  -4  -1 -10  537.24  157.97 
   4   2 -11 1808.21  368.14 
   4   2 -11 1130.78  447.80 
   4  -2 -11 1601.13  252.52 
   4  -2 -11 1193.67  253.60 
   4   2 -10  -74.64  172.97 
   4   2 -10 -264.64  268.12 
   4  -2 -10  436.35  153.00 
   4  -2 -10  176.50  162.67 
   4   2  -9  -39.47  147.60 
   4   2  -9 -161.45  256.51 
   4  -2  -9  171.51  113.99 
   4  -2  -9  188.99  145.76 
   4   2  -8  -44.25  250.98 
   4   2  -8  137.18  154.44 
   4  -2  -8 -235.68   68.97 
  -4  -2   8   54.77  171.80 
   4  -2  -8 -145.37   63.65 
   4  -2  -8  158.33  206.50 
  -4  -2   8  116.21   53.40 
   4   2  -7 1961.66  225.00 
   4   2  -7 1259.05  231.44 
   4   2  -7 1738.14  341.30 
   4  -2  -7 1535.44  181.92 
   4  -2  -7 1761.24  241.16 
   4  -2  -7 1685.92  204.72 
  -4  -2   7 1653.92  295.22 
  -4  -2   7 1713.83  109.72 
   4   2  -6  577.89  147.12 
   4   2  -6  435.28  233.72 
   4   2  -6  570.93  169.95 
  -4   2   6  528.81   61.66 
   4  -2  -6  821.02  171.23 
  -4  -2   6  472.07  157.84 
   4  -2  -6  639.37  136.75 
  -4  -2   6  613.01   79.24 
   4  -2  -6  698.24  118.71 
  -4   2   5 1837.20  155.18 
   4   2  -5 1405.59  279.19 
  -4   2   5 1647.40   93.69 
   4   2  -5 1724.24  190.68 
   4   2  -5 1530.50  222.97 
  -4  -2   5 1914.70  274.57 
   4  -2  -5 1596.28  156.76 
   4  -2  -5 1832.93  181.87 
  -4  -2   5 1690.50  104.28 
   4  -2  -5 1593.38  175.92 
   4   2  -4   13.62  155.39 
   4   2  -4 -147.86   80.94 
  -4   2   4   77.96   72.03 
  -4   2   4   47.49   38.07 
   4   2  -4   27.12   70.03 
   4  -2  -4   43.99   64.77 
  -4  -2   4   26.78   38.78 
  -4  -2   4   59.34   23.36 
  -4  -2   4  -16.06   73.40 
   4  -2  -4  -38.62   71.33 
   4  -2  -4   57.96   58.65 
   4   2  -3  799.99  141.24 
  -4   2   3  638.68   66.47 
   4   2  -3  548.07  177.38 
   4   2  -3  683.25   99.42 
  -4   2   3  461.90   85.11 
   4  -2  -3  490.13   94.17 
  -4  -2   3  637.51   51.91 
   4  -2  -3  670.46   83.73 
  -4  -2   3  515.42   65.12 
   4  -2  -3  513.30  101.48 
  -4  -2   3  511.28  131.08 
   4   2  -2   -0.10   73.69 
  -4   2   2    1.17   31.82 
  -4   2   2   36.00   60.98 
   4   2  -2    7.27   28.84 
  -4   2   2  -19.53   41.15 
   4   2  -2  -21.20   99.27 
   4  -2  -2   49.29   63.22 
  -4  -2   2  -19.53   84.80 
   4  -2  -2  -63.22   65.87 
  -4  -2   2  -10.12   33.31 
   4  -2  -2    6.80   38.04 
  -4   2   1  353.54   55.61 
  -4   2   1  266.35   49.66 
   4   2  -1  453.12  104.09 
   4   2  -1  258.02  101.07 
   4   2  -1  346.59   45.02 
  -4   2   1  401.65   76.70 
   4  -2  -1  411.89   93.82 
  -4  -2   1  330.35   52.47 
  -4  -2   1  327.49  129.00 
   4  -2  -1  372.83   92.63 
  -4   2   0   85.77   37.44 
  -4   2   0   84.73   42.01 
   4   2   0   28.69   68.52 
   4   2   0   93.40   74.74 
  -4   2   0   61.58   55.51 
   4  -2   0   45.19   60.53 
   4  -2   0   60.29   80.29 
  -4  -2   0   70.06   93.53 
  -4  -2   0   27.34   30.76 
   4   2   1  217.36   77.20 
  -4   2  -1  237.56   64.81 
  -4   2  -1  112.98   42.89 
  -4   2  -1  143.05   52.19 
  -4  -2  -1  166.48   36.94 
  -4  -2  -1  173.05  107.25 
   4  -2   1  154.02   85.96 
   4  -2   1   94.73   65.00 
  -4   2  -2   91.90   40.92 
  -4   2  -2  119.54   56.80 
  -4   2  -2   28.50   52.92 
  -4  -2  -2  143.54  102.96 
  -4  -2  -2  155.79   34.94 
   4  -2   2  119.59   82.28 
  -4   2  -3 1466.36   97.44 
  -4   2  -3 1718.08  130.02 
  -4   2  -3 1483.90  114.04 
   4  -2   3 1718.48  178.70 
  -4  -2  -3 1279.91  225.20 
   4  -2   3 1343.54  121.43 
  -4  -2  -3 1422.96   68.50 
  -4   2  -4  249.07   69.42 
  -4   2  -4  201.21   75.00 
  -4   2  -4  179.37   53.43 
  -4  -2  -4  120.79  128.82 
   4  -2   4    7.76   74.61 
   4  -2   4  107.40   60.46 
  -4  -2  -4  151.88   31.44 
  -4   2  -5  410.97   97.49 
  -4   2  -5  384.07   78.69 
  -4   2  -5  312.15   81.88 
  -4  -2  -5  506.00  183.13 
  -4  -2  -5  301.37   67.90 
   4  -2   5  469.74   74.08 
  -4   2  -6  115.89   64.79 
  -4   2  -6 -108.46   63.10 
  -4   2  -6   52.91   69.59 
  -4  -2  -6  -27.39   39.28 
  -4  -2  -6  363.30  154.48 
   4  -2   6   68.71   41.26 
  -4   2  -7 1912.24  202.18 
  -4   2  -7 1727.29  241.84 
  -4   2  -7 1597.48  148.81 
  -4  -2  -7 1413.34  136.23 
  -4   2  -8   59.59  115.04 
  -4   2  -8  -46.65   75.74 
  -4   2  -8   63.88  100.27 
  -4  -2  -8   63.92   62.49 
  -4  -2  -8   -0.39   71.05 
  -4   2  -9   13.47  124.62 
  -4   2  -9   88.37  115.62 
  -4  -2  -9   31.96   70.63 
  -4  -2  -9   89.53   80.37 
  -4   2 -10   11.70  130.26 
  -4   2 -10  -47.21  122.21 
  -4  -2 -10  -28.93   91.57 
  -4  -2 -10  582.22  115.98 
   4   3 -10   22.47  191.80 
   4   3 -10  -26.58  306.70 
   4  -3 -10  197.41  137.22 
   4  -3 -10  -93.13  122.86 
   4   3  -9  -24.69  289.41 
   4   3  -9   72.68  179.91 
   4  -3  -9 -102.69  111.87 
  -4  -3   9   88.70   61.03 
  -4  -3   9  286.05  243.20 
   4  -3  -9  284.91  118.22 
   4   3  -8  434.89  287.06 
   4   3  -8 1135.82  262.20 
   4   3  -8 1155.37  211.07 
  -4  -3   8 1155.28  314.98 
   4  -3  -8  795.52  166.23 
  -4  -3   8 1153.47  116.76 
   4  -3  -8  992.36  168.49 
   4   3  -7 1343.39  240.39 
   4   3  -7 1354.80  225.86 
   4   3  -7 1414.76  331.42 
   4  -3  -7 1236.38  175.60 
  -4  -3   7 1226.80  122.72 
  -4  -3   7 1758.96  351.83 
   4  -3  -7 1346.49  189.73 
  -4   3   6  679.63   71.20 
   4   3  -6  703.61  174.47 
   4   3  -6  685.86  256.62 
   4   3  -6  669.77  180.63 
  -4  -3   6  545.20  193.21 
  -4  -3   6  682.65   91.97 
   4  -3  -6  781.30  147.88 
   4  -3  -6  699.65  134.46 
  -4   3   5 -122.63   76.31 
   4   3  -5   32.53  181.70 
   4   3  -5 -122.00   93.87 
  -4   3   5  -10.02   40.62 
   4   3  -5   93.66  122.16 
   4  -3  -5   20.06   85.38 
  -4  -3   5  -60.94   46.93 
   4  -3  -5   61.17   72.63 
  -4  -3   5   41.17  116.19 
   4   3  -4  257.24  122.78 
   4   3  -4  289.86  196.80 
   4   3  -4  253.67  120.07 
  -4   3   4  382.48   60.90 
  -4   3   4  456.42  112.41 
   4  -3  -4  182.07   81.96 
   4  -3  -4  402.76  104.38 
   4  -3  -4  324.26   55.67 
  -4  -3   4  137.87  136.06 
  -4  -3   4  270.81   69.48 
  -4   3   3  588.59  110.87 
   4   3  -3  480.97  118.00 
  -4   3   3  492.01   65.36 
  -4   3   3  799.26   64.79 
   4   3  -3  507.48  191.75 
   4   3  -3  633.60  132.14 
  -4  -3   3  676.48   87.11 
   4  -3  -3  574.20  107.11 
  -4  -3   3  481.01  167.57 
   4  -3  -3  628.16  113.97 
  -4   3   2  521.52  101.83 
  -4   3   2  627.92   93.53 
  -4   3   2  635.96   74.88 
   4   3  -2  616.16  180.38 
   4   3  -2  633.06  113.13 
   4   3  -2  564.66  115.38 
  -4  -3   2  497.27  166.52 
  -4  -3   2  547.31   77.97 
   4  -3  -2  487.68  103.01 
   4  -3  -2  742.99  119.54 
  -4   3   1 3835.49  162.32 
   4   3  -1 3871.33  192.12 
  -4   3   1 3795.75  179.96 
   4   3  -1 3827.59  262.77 
  -4   3   1 3842.14  144.22 
   4  -3  -1 3750.24  177.07 
  -4  -3   1 4184.63  412.44 
  -4  -3   1 3871.34  147.74 
   4  -3  -1 3807.62  209.24 
  -4   3   0  308.12   84.10 
  -4   3   0  260.54   71.82 
  -4   3   0  239.43   55.22 
   4   3   0  390.22  118.15 
   4   3   0  425.19   87.43 
  -4  -3   0  355.69   56.23 
   4  -3   0  314.59   80.29 
  -4  -3   0  170.27  134.15 
   4  -3   0  414.69  113.03 
   4   3   1  -63.72   66.19 
  -4   3  -1  141.40   74.48 
   4   3   1  111.53   63.16 
  -4   3  -1  122.83   61.47 
  -4   3  -1  137.56   49.74 
  -4  -3  -1   83.82   41.10 
   4  -3   1   35.16   55.05 
  -4  -3  -1  139.40  130.34 
   4  -3   1   70.26   92.83 
  -4   3  -2 1818.21  135.59 
  -4   3  -2 1739.05  114.97 
  -4   3  -2 1688.20  132.65 
  -4  -3  -2 1800.52   91.56 
   4  -3   2 1611.78  138.43 
  -4  -3  -2 1722.45  282.62 
   4  -3   2 1958.30  200.21 
  -4   3  -3  160.72   75.52 
  -4   3  -3  161.97   63.52 
  -4   3  -3  348.98   90.29 
  -4  -3  -3  286.76   38.34 
  -4  -3  -3  289.89   47.62 
   4  -3   3  235.21  101.60 
   4  -3   3  235.06   75.63 
  -4  -3  -3  237.05  145.48 
  -4   3  -4  -44.63   50.82 
  -4   3  -4  102.99   70.95 
  -4   3  -4   72.64   76.84 
   4  -3   4   28.88   60.54 
  -4  -3  -4  162.55  156.59 
   4  -3   4   47.82   89.86 
  -4   3  -5  656.46  113.06 
  -4   3  -5  593.87  149.62 
  -4   3  -5  646.59  127.94 
  -4   3  -5  748.97  112.00 
  -4  -3  -5  785.09  257.29 
   4  -3   5  724.20  100.36 
  -4   3  -6  129.52   96.82 
  -4   3  -6  106.25   80.40 
  -4   3  -6  192.76  113.99 
  -4   3  -6   45.02   76.60 
  -4  -3  -6  597.87  235.83 
   4  -3   6  209.37   68.57 
  -4   3  -7  -14.14  104.84 
  -4   3  -7   -8.63   78.85 
  -4   3  -7   -9.23  101.45 
  -4   3  -8  -64.45   97.36 
  -4   3  -8   61.30  124.99 
  -4   3  -8   23.01   93.07 
  -4  -3  -8    9.81   61.36 
  -4   3  -9  -43.11  109.50 
  -4   3  -9  269.78  164.63 
  -4  -3  -9  -24.99   83.82 
  -4  -3  -9   57.04   74.54 
  -4   3 -10  143.01  150.96 
  -4   3 -10  -98.92  148.70 
  -4  -3 -10   12.29  102.42 
   4   4 -10  215.23  306.34 
   4   4 -10   43.91  207.21 
   4  -4 -10   -8.55  133.35 
   4  -4 -10  -38.51  151.23 
   4   4  -9   94.10  185.04 
   4   4  -9   61.45  285.78 
   4  -4  -9 -126.11  112.23 
  -4  -4   9   82.46  244.35 
   4  -4  -9   -4.66  115.50 
  -4  -4   9   72.51   75.66 
   4   4  -8  166.26  144.36 
   4   4  -8   67.41  148.85 
   4   4  -8 -134.11  223.24 
  -4  -4   8   -6.12   60.79 
  -4  -4   8  105.69  220.34 
   4  -4  -8    6.72   96.87 
   4  -4  -8 -168.62   93.04 
   4   4  -7   76.65  128.73 
   4   4  -7  -69.21  209.14 
   4   4  -7   42.87  135.78 
  -4  -4   7  332.37  227.85 
   4  -4  -7  -16.94   82.36 
  -4  -4   7   -7.42   60.85 
   4  -4  -7 -176.69   91.45 
   4   4  -6  170.07  138.53 
   4   4  -6   52.58  125.93 
   4   4  -6   59.67  198.48 
  -4  -4   6  400.79  223.58 
   4  -4  -6  204.23  101.73 
  -4  -4   6  245.38   81.11 
   4  -4  -6   92.32  100.35 
   4   4  -5  526.91  174.71 
   4   4  -5  956.95  184.00 
  -4   4   5  695.32   91.07 
   4   4  -5  531.35  237.30 
   4  -4  -5  947.80  151.58 
  -4  -4   5  719.94  111.41 
   4  -4  -5  782.33  131.88 
  -4  -4   5  814.46  246.58 
   4   4  -4 3584.22  352.05 
   4   4  -4 4509.24  263.08 
  -4   4   4 3746.96  160.52 
  -4   4   4 3610.73  240.62 
   4   4  -4 3678.80  298.98 
   4  -4  -4 3618.27  205.05 
  -4  -4   4 3697.20  201.16 
   4  -4  -4 3856.18  231.95 
  -4  -4   4 4152.86  520.90 
  -4   4   3 1940.42  193.83 
  -4   4   3 1776.36  124.07 
   4   4  -3 2150.28  201.32 
   4   4  -3 1839.00  301.97 
   4   4  -3 2010.99  241.66 
  -4   4   3 1978.02  128.99 
   4  -4  -3 2136.09  210.73 
   4  -4  -3 1880.61  158.73 
  -4  -4   3 1835.75  152.01 
  -4  -4   3 1790.60  325.07 
   4   4  -2  -52.57   83.95 
   4   4  -2  100.41  138.01 
  -4   4   2   78.64   86.29 
  -4   4   2   68.91   54.10 
  -4   4   2  -15.35   84.29 
   4   4  -2   -2.51   83.65 
   4  -4  -2   -3.96   88.82 
   4  -4  -2   15.36   73.08 
  -4  -4   2   29.71   56.05 
  -4  -4   2  126.66  166.92 
  -4   4   1  185.93   61.74 
   4   4  -1  195.95   84.56 
  -4   4   1  177.77  118.60 
  -4   4   1  342.49   46.65 
   4   4  -1  240.63  134.79 
  -4   4   1  177.78   95.49 
  -4  -4   1  166.68  160.46 
   4  -4  -1  164.48   97.44 
   4  -4  -1  159.69   65.01 
  -4  -4   1  236.26   71.71 
   4   4   0  593.60   83.85 
  -4   4   0  430.91   82.51 
  -4   4   0  688.32   83.01 
  -4   4   0  556.29  123.43 
  -4   4   0  624.99  113.44 
   4   4   0  620.04  154.11 
   4  -4   0  465.11  130.09 
  -4  -4   0  556.70   86.95 
   4  -4   0  676.69  102.26 
  -4  -4   0  544.30  193.69 
  -4   4  -1 1878.33  178.12 
   4   4   1 2004.15  193.27 
  -4   4  -1 1678.16  158.29 
  -4   4  -1 1910.53  125.65 
  -4   4  -1 1868.93  137.32 
  -4  -4  -1 1859.44  126.04 
   4  -4   1 2031.06  226.69 
   4  -4   1 1933.37  203.28 
  -4  -4  -1 1626.01  296.53 
  -4   4  -2 1395.24  132.16 
  -4   4  -2 1435.58  164.19 
  -4   4  -2 1419.70  154.41 
  -4   4  -2 1543.61  154.93 
  -4  -4  -2 1442.72  289.17 
  -4  -4  -2 1284.87  106.73 
   4  -4   2 1371.28  176.87 
   4  -4   2 1245.46  197.38 
   4  -4   2 1365.01  143.94 
  -4   4  -3  146.77   85.09 
  -4   4  -3   72.78   78.00 
  -4   4  -3  267.88   82.89 
  -4   4  -3  146.14   98.59 
  -4  -4  -3   61.37  151.12 
   4  -4   3  236.15   78.38 
   4  -4   3  104.09  100.24 
  -4  -4  -3  112.37   50.86 
  -4   4  -4  890.37  156.31 
  -4   4  -4  846.94  149.17 
  -4   4  -4  867.88  125.11 
  -4   4  -4  863.49  130.76 
  -4  -4  -4  960.70  296.86 
   4  -4   4 1033.04  172.49 
   4  -4   4  741.27  108.39 
  -4   4  -5  258.56  115.54 
  -4   4  -5  245.51   95.82 
  -4   4  -5  397.67  112.61 
  -4   4  -5  297.27  124.38 
   4  -4   5  165.77  104.97 
  -4  -4  -5  341.14  217.01 
   4  -4   5  213.20   76.97 
  -4   4  -6  190.85  113.89 
  -4   4  -6  175.03  101.75 
  -4   4  -6   63.83  113.18 
  -4   4  -6  182.75  131.21 
  -4  -4  -6  540.40  234.31 
   4  -4   6  268.36   83.14 
  -4   4  -7  190.54  142.27 
  -4   4  -7  185.63  114.30 
  -4   4  -7   29.35   98.66 
  -4   4  -7  132.82  133.46 
   4  -4   7  131.84   69.06 
  -4   4  -9  -43.20  144.66 
  -4   4  -9  -15.37  159.10 
  -4  -4  -9   94.90   92.11 
  -4  -4  -9  105.38   81.80 
   4   5  -9 1847.68  419.11 
   4   5  -9 1487.71  390.83 
   4   5  -9 1102.81  258.97 
  -4  -5   9 1126.30  159.50 
  -4  -5   9 1559.26  394.58 
   4  -5  -9 1525.31  246.37 
   4   5  -8  771.42  213.26 
   4   5  -8  833.49  315.92 
   4   5  -8  795.02  216.99 
   4  -5  -8  730.66  212.57 
  -4  -5   8  541.07  122.94 
  -4  -5   8 1272.47  377.67 
   4  -5  -8  505.70  162.81 
   4   5  -7  147.02  150.43 
   4   5  -7   58.71  243.66 
   4   5  -7 -189.62  119.93 
   4  -5  -7  -34.25   97.74 
  -4  -5   7   19.81   82.92 
   4  -5  -7 -108.08   89.58 
  -4  -5   7  179.68  254.42 
   4   5  -6   36.95  185.42 
   4   5  -6  141.20  149.40 
   4   5  -6  145.45  134.21 
   4  -5  -6  229.90  111.41 
   4  -5  -6  227.76  116.45 
  -4  -5   6  284.57  105.56 
  -4  -5   6  318.81  259.36 
   4   5  -5  578.04  236.45 
   4   5  -5  271.04  131.80 
   4   5  -5  396.56  161.67 
  -4  -5   5  518.73  122.83 
  -4  -5   5  579.57  301.76 
   4  -5  -5  346.93  125.64 
   4  -5  -5  330.97  114.12 
   4   5  -4  -28.71  167.28 
   4   5  -4   73.37  100.52 
  -4   5   4  -64.77   91.57 
  -4   5   4   66.37   69.30 
   4   5  -4   20.72  113.87 
  -4  -5   4   32.86  226.34 
   4  -5  -4    8.92   83.55 
   4  -5  -4  -15.91   98.91 
  -4  -5   4   58.17   88.13 
  -4   5   3  220.01   95.69 
   4   5  -3  415.54  112.12 
  -4   5   3   72.46   71.53 
   4   5  -3  239.51  148.32 
  -4   5   3   98.48  103.02 
   4   5  -3  175.26  169.82 
  -4  -5   3  224.90   99.15 
  -4  -5   3  292.66  235.05 
   4  -5  -3  248.67   88.48 
   4  -5  -3  227.47  117.34 
   4   5  -2 1233.54  138.42 
  -4   5   2 1104.29  124.04 
   4   5  -2  996.10  189.88 
   4   5  -2  949.45  215.94 
  -4   5   2  907.36  147.15 
  -4   5   2 1255.19  175.35 
   4  -5  -2 1389.85  134.72 
  -4  -5   2  977.74  278.83 
  -4  -5   2 1291.49  149.07 
   4  -5  -2 1160.96  169.20 
   4   5  -1  855.66  170.01 
  -4   5   1 1081.93  125.09 
  -4   5   1  870.20  147.31 
  -4   5   1  997.21  162.29 
   4   5  -1 1212.35  220.16 
  -4  -5   1 1181.03  140.57 
   4  -5  -1  997.71  115.16 
  -4  -5   1  894.79  254.68 
   4  -5  -1 1097.77  172.15 
  -4   5   0  495.41  116.91 
   4   5   0  572.70  161.33 
  -4   5   0  736.33  112.50 
  -4   5   0  731.36  161.02 
  -4  -5   0  456.97  205.72 
  -4  -5   0  540.53   99.19 
   4  -5   0  577.90  101.95 
   4  -5   0 1139.14  218.79 
   4  -5   0  593.76  144.37 
  -4   5  -1 1047.13  148.74 
   4   5   1  966.52  181.82 
  -4   5  -1  834.74  119.74 
  -4   5  -1  796.55  111.93 
  -4   5  -1  881.80  168.53 
  -4  -5  -1  742.96  240.35 
   4  -5   1  767.56  116.22 
  -4  -5  -1  851.39  106.44 
   4  -5   1 1185.81  225.85 
   4  -5   1  853.28  154.69 
  -4   5  -2 -199.06   82.36 
  -4   5  -2   30.34   73.53 
  -4   5  -2  -35.15   67.47 
  -4   5  -2  140.80  139.19 
   4  -5   2  -61.03  119.18 
   4  -5   2 -105.34   84.05 
   4  -5   2  -34.74   63.20 
  -4  -5  -2   38.51   58.12 
  -4  -5  -2   36.15  151.97 
  -4   5  -3   75.75   82.98 
  -4   5  -3  -57.62   90.96 
  -4   5  -3   45.30   84.72 
  -4   5  -3   13.82  115.43 
   4  -5   3    3.97   61.35 
  -4  -5  -3  -36.99  150.52 
   4  -5   3   48.91   94.10 
  -4   5  -4  938.98  174.06 
  -4   5  -4 1011.09  147.68 
  -4   5  -4  962.80  153.94 
  -4   5  -4 1263.52  193.77 
   4  -5   4 1111.27  186.51 
   4  -5   4  755.23  116.22 
  -4  -5  -4 1233.88  354.24 
  -4   5  -5  212.84  124.05 
  -4   5  -5  143.26  129.73 
  -4   5  -5  276.84  108.53 
  -4   5  -5  -54.48   93.99 
   4  -5   5  193.10  112.69 
  -4  -5  -5  178.40  243.68 
   4  -5   5  309.52   89.66 
  -4   5  -6  184.96  147.60 
  -4   5  -6  340.22  112.59 
  -4   5  -6   31.03  114.20 
   4  -5   6  162.70   73.56 
  -4  -5  -6  473.86  245.71 
  -4   5  -7  178.54  114.25 
  -4   5  -7  125.25  146.46 
  -4   5  -7  536.84  194.72 
   4  -5   7  169.28   89.57 
  -4  -5  -7 1155.34  264.59 
  -4   5  -9  823.73  256.53 
  -4   5  -9  722.91  251.96 
  -4  -5  -9  657.47  137.77 
   4   6  -8   68.71  197.90 
   4   6  -8  280.28  181.48 
   4   6  -8 -203.73  213.62 
  -4  -6   8   25.80  101.49 
  -4  -6   8  839.88  329.58 
   4  -6  -8 -144.01  115.01 
   4   6  -7   74.57  209.35 
   4   6  -7  132.46  159.08 
  -4  -6   7  693.39  363.01 
   4  -6  -7   80.92  132.02 
  -4  -6   7   64.67  103.71 
   4   6  -6 1508.57  265.95 
   4   6  -6 1600.14  339.33 
  -4  -6   6 2225.22  533.15 
  -4  -6   6 1738.78  214.47 
   4  -6  -6 1515.28  226.73 
   4   6  -5  148.95  144.81 
   4   6  -5  331.26  212.57 
   4  -6  -5   11.52  115.95 
  -4  -6   5  190.25  106.01 
  -4  -6   5  328.75  368.96 
   4   6  -4   19.74  153.43 
   4   6  -4  -15.45  127.08 
   4  -6  -4   29.79  112.14 
  -4  -6   4   44.40   97.58 
  -4  -6   4   75.42  336.54 
   4   6  -3  216.42  155.37 
   4   6  -3  169.54  151.94 
  -4   6   3  314.14  126.01 
   4  -6  -3  103.67  114.71 
  -4  -6   3  248.26  290.64 
  -4  -6   3  319.40  123.24 
   4   6  -2   57.38  118.26 
  -4   6   2   36.89  104.47 
  -4   6   2  220.13   98.94 
   4   6  -2 -160.36   91.49 
  -4   6   2   -0.79   66.48 
   4  -6  -2  -18.07  108.12 
  -4  -6   2    3.95   86.24 
  -4  -6   2  -49.79  210.20 
   4   6  -1  255.51  139.04 
  -4   6   1  382.95  134.58 
   4   6  -1  456.29  164.87 
  -4   6   1  331.62   98.17 
  -4   6   1  350.26  119.17 
  -4  -6   1  221.91   90.81 
   4  -6  -1  935.46  218.08 
  -4  -6   1  256.68  224.63 
   4  -6  -1  468.60  141.34 
   4  -6  -1  582.67  109.49 
   4   6   0  -50.88   89.17 
  -4   6   0  -25.83   71.05 
  -4   6   0   31.09  122.36 
  -4   6   0  136.35  106.68 
   4  -6   0    7.18   77.02 
  -4  -6   0  -13.80   61.46 
  -4  -6   0  -24.74  175.05 
   4  -6   0  145.63  156.42 
   4  -6   0  -67.01   88.06 
  -4   6  -1   25.55   80.13 
   4   6   1  -18.65   94.33 
  -4   6  -1 -219.77  128.26 
  -4   6  -1   72.36   99.54 
   4  -6   1  170.00  112.95 
   4  -6   1  266.97  161.33 
   4  -6   1 -134.27   61.13 
  -4  -6  -1   98.09   70.47 
  -4  -6  -1   20.48  181.49 
  -4   6  -2  185.36  103.83 
  -4   6  -2  311.46  168.44 
  -4   6  -2  255.31  106.88 
   4  -6   2  344.92   95.36 
  -4  -6  -2  180.29  183.85 
   4  -6   2  115.41  103.79 
  -4  -6  -2  253.83   81.00 
  -4   6  -3   86.90   92.14 
  -4   6  -3  199.45  161.35 
  -4   6  -3  232.79  103.43 
  -4   6  -3  277.76  123.88 
   4  -6   3  295.27  121.72 
   4  -6   3  174.95   79.58 
  -4  -6  -3  252.97  233.94 
  -4   6  -4  613.19  135.91 
  -4   6  -4  603.21  154.49 
  -4   6  -4  666.97  200.32 
  -4  -6  -4  570.50  318.44 
   4  -6   4  547.04  109.35 
   4  -6   4  749.57  156.38 
  -4   6  -5  318.61  117.66 
  -4   6  -5  457.52  201.50 
  -4   6  -5  141.63  124.19 
   4  -6   5  223.59   81.43 
   4  -6   5   61.03   99.24 
  -4  -6  -5  266.15  293.43 
  -4   6  -6  522.39  132.03 
  -4   6  -6  199.32  144.67 
  -4   6  -6  104.20  183.97 
  -4  -6  -6  819.50  334.95 
   4  -6   6  367.68   99.25 
  -4   6  -7  421.31  199.54 
  -4   6  -7  251.61  209.18 
  -4   6  -7  430.95  120.56 
   4  -6   7  335.70  102.08 
  -4   6  -8  361.40  245.22 
   4   7  -7  411.26  175.19 
   4   7  -7  192.10  231.51 
   4  -7  -7  291.19  171.15 
  -4  -7   7  452.60  141.28 
   4   7  -6 1114.78  301.99 
  -4  -7   6 1739.27  512.91 
  -4  -7   6  871.69  179.72 
   4  -7  -6  832.14  203.35 
   4   7  -5  328.20  197.14 
   4   7  -5   25.28  138.04 
   4  -7  -5  281.91  148.96 
  -4  -7   5  271.81  451.31 
  -4  -7   5   35.30  111.28 
   4   7  -4  -19.80  140.42 
   4   7  -4   80.19  148.45 
  -4  -7   4   13.07  100.99 
   4  -7  -4  -95.80  112.24 
  -4  -7   4  195.71  438.13 
  -4   7   3  164.86  134.38 
   4   7  -3   60.72  127.70 
   4   7  -3   93.35  139.21 
  -4  -7   3    2.26  371.69 
  -4  -7   3  169.19  108.45 
   4  -7  -3   75.43  133.49 
  -4   7   2 1414.89  222.04 
   4   7  -2 1104.66  216.20 
   4   7  -2 1379.60  246.46 
  -4   7   2 1300.11  203.30 
   4  -7  -2 1270.81  173.74 
   4  -7  -2 1380.79  210.13 
  -4  -7   2 1691.63  475.37 
  -4  -7   2 1550.43  182.07 
   4   7  -1  301.23  138.38 
  -4   7   1   47.81  102.14 
  -4   7   1  382.13  140.87 
   4  -7  -1  299.03  134.63 
  -4  -7   1  442.26  107.51 
   4  -7  -1  174.07  102.18 
  -4  -7   1 -118.80  245.18 
  -4   7   0  491.90  146.82 
  -4   7   0  467.10  157.31 
   4   7   0  273.90  147.22 
  -4  -7   0  582.62  309.24 
   4  -7   0  467.23  144.14 
   4  -7   0  444.06  124.09 
   4  -7   0 1101.30  253.71 
  -4  -7   0  353.13   92.77 
  -4   7  -1  -63.22   93.38 
  -4   7  -1  221.95  157.51 
   4  -7   1  444.98  205.84 
  -4  -7  -1 -112.82  217.97 
   4  -7   1   59.97   78.49 
  -4  -7  -1   75.43   68.76 
   4  -7   1  -91.25   89.09 
  -4   7  -2 1335.10  241.99 
  -4   7  -2 1274.09  192.76 
   4  -7   2 1336.73  191.13 
  -4  -7  -2 1392.83  404.09 
   4  -7   2 1025.32  147.25 
  -4   7  -3    6.96  107.87 
  -4   7  -3   -2.11  180.92 
   4  -7   3  -61.40   62.24 
  -4  -7  -3  -28.09  248.73 
   4  -7   3  113.00  101.04 
  -4   7  -4  -64.67   94.44 
  -4   7  -4  -34.37  196.87 
   4  -7   4   80.54  102.66 
  -4  -7  -4 -213.43  267.24 
   4  -7   4  167.14   79.40 
  -4   7  -5  330.23  279.28 
  -4   7  -5  198.28  117.69 
  -4   7  -5  306.41  209.05 
  -4  -7  -5  366.39  364.59 
   4  -7   5  267.40   92.62 
   4  -7   5  -64.92   88.79 
  -4   7  -6  -86.02  155.61 
  -4   7  -6  280.02  127.65 
  -4   7  -6   22.90  217.69 
  -4  -7  -6  -73.48  303.75 
   4  -7   6  -13.41   74.69 
  -4   7  -7  248.38  246.90 
  -4   7  -7 -119.85  179.94 
   4  -7   7   68.50   96.34 
   4   8  -6  379.93  222.60 
   4  -8  -6  288.98  180.18 
  -4  -8   6  905.96  462.77 
  -4  -8   6  316.02  139.11 
   4   8  -5  226.15  171.65 
   4   8  -5  391.62  189.71 
  -4  -8   5  998.81  539.53 
   4  -8  -5  253.87  177.67 
  -4  -8   5  569.12  144.35 
   4   8  -4  110.89  150.83 
   4   8  -4  194.91  146.49 
  -4  -8   4   34.69  502.76 
   4  -8  -4  -32.00  143.15 
  -4  -8   4  178.99  113.43 
   4  -8  -4  138.21  119.18 
   4   8  -3 1366.98  264.63 
   4   8  -3 1143.91  230.01 
  -4  -8   3 1673.52  589.06 
   4  -8  -3 1603.08  206.61 
  -4  -8   3 1507.42  193.14 
   4  -8  -3 1035.15  213.96 
   4   8  -2  196.85  147.18 
   4   8  -2  175.29  143.01 
   4  -8  -2  -64.09  115.05 
  -4  -8   2  -22.69   80.38 
   4  -8  -2  101.99  112.21 
  -4  -8   2 -372.12  390.76 
  -4   8   1  399.03  155.65 
   4   8  -1  344.87  155.10 
  -4   8   1  282.73  123.55 
  -4  -8   1  -12.20  377.33 
  -4  -8   1  248.23   99.55 
   4  -8  -1   80.93  119.11 
   4  -8  -1  274.75  116.01 
  -4   8   0  101.39  124.60 
  -4   8   0  404.60  141.45 
  -4  -8   0   77.47   84.60 
   4  -8   0   91.35   92.61 
  -4  -8   0   32.09  342.27 
   4  -8   0  131.51  106.65 
  -4   8  -1 1050.05  214.33 
  -4   8  -1 1219.71  205.39 
   4  -8   1 1044.11  158.60 
   4  -8   1  954.12  173.86 
  -4  -8  -1 1141.00  144.90 
  -4  -8  -1 1052.91  452.86 
  -4   8  -2   93.24  172.05 
  -4   8  -2  195.45  130.10 
   4  -8   2   60.62   84.41 
   4  -8   2   61.16   88.71 
  -4  -8  -2 -225.78  331.85 
  -4   8  -3   38.66  111.15 
  -4   8  -3  -21.80  186.26 
   4  -8   3  -50.04   76.85 
  -4  -8  -3 -106.73  350.18 
   4  -8   3   28.28   94.32 
  -4   8  -4  205.22  131.77 
  -4   8  -4  217.30  203.95 
   4  -8   4  352.19  106.57 
  -4  -8  -4  362.20  388.78 
   4  -8   4  278.01  118.46 
  -4   8  -5  343.18  150.30 
  -4   8  -5  -14.29  220.09 
   4  -8   5   71.87   82.47 
  -4  -8  -5  157.50  383.90 
   4   9  -3  328.23  164.38 
  -4  -9   3  340.28  536.80 
   4  -9  -2  264.45  147.52 
  -4  -9   2 -387.35  473.66 
   4  -9  -2  166.12  117.74 
  -4  -9   2  333.92  120.06 
  -4  -9   1 -488.36  431.12 
   4  -9  -1  198.93  131.71 
  -4   9   0  336.23  155.84 
  -4   9   0  311.69  157.57 
  -4  -9   0 -780.41  422.67 
   4  -9   0  -85.59   97.79 
  -4  -9   0  103.05   90.34 
   4  -9   0  215.55  128.80 
  -4   9  -1 1101.69  228.24 
  -4   9  -1  900.15  201.31 
  -4  -9  -1  524.80  491.79 
   4  -9   1  779.51  161.84 
   4  -9   1  518.89  129.25 
  -4   9  -2  229.29  144.34 
  -4   9  -2  278.22  185.94 
   4  -9   2   24.91   90.14 
  -4  -9  -2 -583.96  421.81 
   4  -9   2  204.42  103.94 
   5   0 -11   22.45  182.03 
   5   0 -11   79.94  104.35 
   5   0 -11 -291.93  294.29 
   5   0 -10 1300.25  284.82 
   5   0 -10 1128.99  191.58 
   5   0 -10 1118.21  378.16 
   5   0  -9    5.75  148.21 
   5   0  -9  -10.26  261.29 
   5   0  -9  -43.88   83.83 
   5   0  -8  844.24  151.46 
  -5   0   8  721.45   79.49 
   5   0  -8  497.29  174.09 
   5   0  -8  385.60  257.56 
  -5   0   7    5.76   42.81 
   5   0  -7  -22.47  195.40 
   5   0  -7   50.59   70.16 
   5   0  -7   -8.06  113.53 
   5   0  -6   29.97   61.85 
   5   0  -6 -143.76  159.29 
  -5   0   6   53.80   46.36 
   5   0  -6  -49.38  110.76 
   5   0  -5  168.84  156.48 
  -5   0   5  -21.85   35.18 
   5   0  -5   24.17  101.00 
  -5   0   5   47.31   66.69 
   5   0  -5   71.69   66.12 
   5   0  -4  728.46  162.95 
  -5   0   4  634.43   74.88 
   5   0  -4  841.52  106.81 
  -5   0   4  550.63  127.65 
  -5   0   4  816.98   77.48 
   5   0  -4  634.95  147.39 
  -5   0   3   21.43   52.08 
   5   0  -3  -30.03   79.94 
  -5   0   3   10.93   34.25 
   5   0  -3   47.50   50.07 
   5   0  -3  -47.31   77.63 
  -5   0   3   42.07   48.70 
   5   0  -2  155.74   65.16 
  -5   0   2  117.52   38.11 
  -5   0   2  145.47   46.88 
  -5   0   2  114.44   64.99 
   5   0  -2  185.70   78.40 
   5   0  -2  267.44  106.30 
   5   0  -1  -76.16   73.73 
  -5   0   1  -18.60   33.03 
   5   0  -1  -48.04   51.48 
  -5   0   1   11.23   30.48 
   5   0  -1   -8.91   63.83 
  -5   0   1  -19.24   40.56 
  -5   0   0  544.62   91.89 
   5   0   0  753.12  111.11 
  -5   0   0  673.60   61.62 
   5   0   0  861.72  126.92 
  -5   0   0  660.60   71.07 
   5   0   1    8.15   56.23 
  -5   0  -1   20.03   29.03 
  -5   0  -1    2.02   36.13 
  -5   0  -1  -11.29   35.28 
   5   0   1  -24.80   71.11 
   5   0   2  694.57  131.92 
  -5   0  -2  502.89   77.89 
   5   0   2  685.46   92.60 
  -5   0  -2  798.04   69.07 
  -5   0  -2  666.30   76.61 
   5   0   3   82.08   52.82 
  -5   0  -3   40.03   41.25 
  -5   0  -3   -7.97   26.71 
  -5   0  -4  921.87   74.44 
  -5   0  -4  681.98   87.61 
  -5   0  -4  831.49  116.71 
   5   0   4  766.18   64.95 
  -5   0  -5   22.32   42.17 
  -5   0  -5  -37.42   32.73 
  -5   0  -5  -16.02   51.05 
  -5   0  -6  158.22   59.99 
  -5   0  -6  -13.16   58.59 
  -5   0  -7   28.24   61.17 
  -5   0  -7    8.26   59.45 
  -5   0  -8 2387.99  248.06 
  -5   0  -8 2338.42  168.70 
  -5   0  -9  -82.38   80.85 
  -5   0  -9  243.73  106.77 
  -5   0  -9 -171.40   64.75 
  -5   0 -10   -2.50  108.21 
  -5   0 -10  304.64  158.65 
   5   1 -11  469.56  251.35 
   5   1 -11  542.19  381.25 
   5   1 -11  671.06  154.81 
   5  -1 -11  416.69  164.12 
   5  -1 -11  346.96  212.75 
   5   1 -10 -244.83  307.05 
   5   1 -10  -81.92  170.32 
   5   1 -10   77.98   93.62 
   5  -1 -10  -75.86   87.45 
   5  -1 -10   43.22  164.33 
   5   1  -9    0.75  158.95 
   5   1  -9  167.43   99.27 
   5   1  -9  335.10  293.94 
   5  -1  -9   49.86   89.98 
   5  -1  -9   82.31  229.74 
   5  -1  -9  -51.39  124.88 
   5   1  -8  219.03  174.74 
   5   1  -8  133.33  247.06 
   5   1  -8  291.86   99.50 
   5  -1  -8  303.95  108.53 
  -5  -1   8  268.28   62.30 
   5  -1  -8  304.12  198.22 
   5  -1  -8  212.10  142.40 
  -5   1   7 1055.16   92.25 
   5   1  -7  915.30  200.74 
   5   1  -7  806.34  280.30 
   5   1  -7 1167.47  150.32 
  -5  -1   7 1024.20  235.71 
  -5  -1   7  850.17   87.47 
   5  -1  -7  774.75  143.10 
   5  -1  -7  579.33  203.69 
   5  -1  -7 1050.39  189.49 
   5   1  -6  756.57  252.83 
   5   1  -6  870.05  189.59 
  -5   1   6  671.80   75.03 
   5   1  -6  911.21  127.19 
  -5  -1   6  602.23  172.25 
  -5  -1   6  811.10   84.90 
   5  -1  -6  722.25  191.02 
   5  -1  -6  685.69  122.56 
   5  -1  -6  852.92  169.35 
   5   1  -5   69.58  168.21 
   5   1  -5   97.93  120.63 
  -5   1   5   23.95   39.66 
   5   1  -5   44.80   56.48 
  -5   1   5   10.56   61.25 
   5  -1  -5   50.74  115.47 
   5  -1  -5   41.21   62.35 
  -5  -1   5    4.08   41.98 
   5  -1  -5   21.86   98.90 
  -5  -1   5   74.05   83.90 
  -5   1   4  410.49   82.12 
  -5   1   4  333.11   56.15 
   5   1  -4  387.87   78.73 
   5   1  -4   88.61  153.71 
   5   1  -4  223.61  121.51 
   5  -1  -4  327.59  104.73 
   5  -1  -4  321.48  108.37 
  -5  -1   4  281.02  106.77 
   5  -1  -4  307.26   86.13 
  -5  -1   4  299.00   55.27 
  -5  -1   4  340.15   53.79 
  -5   1   3   -2.00   35.62 
   5   1  -3  -47.65   37.14 
   5   1  -3    4.26  100.06 
   5   1  -3   36.59   91.11 
  -5   1   3   26.49   62.63 
   5  -1  -3   58.09   85.68 
  -5  -1   3   23.09   59.71 
   5  -1  -3   -2.41   55.07 
  -5  -1   3   58.53   36.45 
  -5  -1   3  -12.27   31.65 
   5  -1  -3   31.11   70.02 
  -5   1   2   73.02   56.31 
   5   1  -2   40.46   92.97 
  -5   1   2  -20.59   31.37 
   5   1  -2   54.26   45.73 
   5   1  -2   -1.74   78.48 
  -5   1   2   14.10   23.47 
  -5  -1   2  -36.97   29.00 
   5  -1  -2  -13.06   52.58 
  -5  -1   2    3.55   59.66 
   5  -1  -2   79.25   64.63 
   5  -1  -2  129.44   90.73 
  -5  -1   2   34.52   32.29 
   5   1  -1  -48.16   63.43 
   5   1  -1  -59.08   50.62 
  -5   1   1   16.56   41.39 
  -5   1   1   -8.12   32.58 
  -5   1   1   -3.35   30.03 
  -5   1   1  -71.71   46.61 
   5   1  -1 -134.23   76.63 
  -5  -1   1   27.72   31.16 
  -5  -1   1   46.37   31.18 
  -5  -1   1   -7.81   58.35 
   5  -1  -1  -53.86   69.49 
   5  -1  -1   99.32   76.40 
  -5   1   0 1727.08   92.35 
   5   1   0 1740.85  116.23 
   5   1   0 2193.18  201.17 
  -5   1   0 1718.83  105.59 
  -5   1   0 1866.95  150.56 
   5   1   0 1900.36  148.41 
  -5   1   0 1823.26   97.85 
  -5  -1   0 1775.06  210.22 
  -5  -1   0 1904.53   95.68 
   5  -1   0 2072.20  167.34 
   5  -1   0 1827.82  154.59 
  -5  -1   0 2008.47   91.83 
   5   1   1   26.15   71.58 
  -5   1  -1   21.73   38.70 
  -5   1  -1  -20.78   26.46 
  -5   1  -1  -20.39   37.18 
   5   1   1   -2.01   35.19 
  -5  -1  -1   -2.60   70.33 
  -5  -1  -1   -2.36   34.26 
   5  -1   1  -60.67   70.25 
   5  -1   1   37.32   67.55 
  -5  -1  -1    2.34   26.75 
  -5   1  -2  353.92   70.28 
  -5   1  -2  439.75   74.58 
  -5   1  -2  469.50   57.84 
   5   1   2  444.42  119.78 
  -5  -1  -2  406.61   49.32 
   5  -1   2  496.57   98.96 
  -5  -1  -2  318.70  100.55 
  -5  -1  -2  409.30   64.84 
   5  -1   2  429.72  107.14 
  -5   1  -3  340.50   57.54 
  -5   1  -3  432.77   85.74 
  -5   1  -3  306.07   67.04 
   5  -1   3  600.49  107.67 
  -5  -1  -3  356.45   45.68 
  -5  -1  -3  398.82   68.62 
  -5  -1  -3  246.40  100.80 
  -5   1  -4   67.77   56.64 
  -5   1  -4   25.00   39.24 
  -5   1  -4   15.45   49.39 
   5  -1   4   15.88   47.75 
  -5  -1  -4  -65.73   86.45 
  -5  -1  -4   93.15   50.56 
  -5  -1  -4   84.38   33.00 
  -5   1  -5 1148.42  116.13 
  -5   1  -5 1278.57  147.37 
  -5   1  -5 1448.54  112.29 
   5  -1   5 1041.00   76.69 
  -5  -1  -5 1103.70  110.17 
  -5  -1  -5  938.78  194.29 
  -5   1  -6   74.98   64.16 
  -5   1  -6  177.16   82.32 
  -5  -1  -6  248.70   88.85 
  -5  -1  -6  130.30   57.62 
  -5   1  -7  -13.84   65.95 
  -5   1  -7   42.56   78.44 
  -5  -1  -7   89.81   56.59 
  -5  -1  -7   79.39   74.79 
  -5   1  -8  -37.54   71.06 
  -5   1  -8   44.60   86.93 
  -5   1  -8  188.92  119.24 
  -5  -1  -8   -7.01   76.09 
  -5  -1  -8  -21.20   57.67 
  -5   1  -9  308.54  139.93 
  -5   1  -9  229.69  102.08 
  -5   1  -9  303.35  148.61 
  -5  -1  -9  314.87  124.88 
  -5  -1  -9  128.88   86.12 
  -5   1 -10  351.38  151.87 
  -5   1 -10   32.85  126.91 
  -5  -1 -10  -35.72   99.13 
   5   2 -10   71.88  192.65 
   5   2 -10  206.78   90.21 
   5   2 -10  193.02  319.28 
   5  -2 -10 -110.53  127.51 
   5  -2 -10  158.72  121.79 
   5   2  -9 -168.21  260.15 
   5   2  -9   66.79  175.87 
   5  -2  -9  -24.75   91.95 
  -5  -2   9   82.29   62.43 
   5  -2  -9   52.72  135.13 
   5   2  -8  -52.52  146.57 
   5   2  -8  101.90  266.61 
   5  -2  -8  183.80  128.46 
  -5  -2   8   42.67  155.17 
  -5  -2   8   23.39   46.73 
   5  -2  -8  -47.62   73.67 
   5   2  -7  379.80  169.47 
  -5   2   7  142.77   49.99 
   5   2  -7  198.58  247.90 
  -5  -2   7   98.31  128.19 
  -5  -2   7  217.17   62.96 
   5  -2  -7  203.39  127.11 
   5  -2  -7  106.43   81.06 
   5  -2  -7  420.26  156.17 
   5   2  -6 -125.51  208.38 
   5   2  -6   30.17   85.10 
  -5   2   6   -4.98   43.15 
   5   2  -6    8.71  126.19 
   5  -2  -6   49.45   71.07 
  -5  -2   6   90.52   52.03 
  -5  -2   6   72.85  109.44 
   5  -2  -6   -8.90   95.73 
   5  -2  -6   43.39  103.96 
   5   2  -5  817.30  179.46 
  -5   2   5  814.00   83.25 
  -5   2   5  779.83  123.01 
   5   2  -5  936.19  119.36 
   5   2  -5  909.55  120.22 
   5   2  -5  635.79  241.73 
   5  -2  -5  887.30  128.58 
   5  -2  -5 1026.55  142.77 
   5  -2  -5  797.14  146.50 
  -5  -2   5  738.57   86.82 
  -5  -2   5  682.54  177.08 
   5   2  -4  111.70   61.18 
   5   2  -4  -23.79  167.65 
  -5   2   4   27.34   45.12 
   5   2  -4  143.69  122.95 
  -5   2   4   77.85   76.86 
   5   2  -4   51.89   55.06 
  -5  -2   4   68.55   32.20 
  -5  -2   4   54.48   92.17 
   5  -2  -4  147.25   80.67 
   5  -2  -4   75.94   93.84 
   5  -2  -4  147.75   73.75 
  -5  -2   4  108.72   51.01 
  -5   2   3 2759.72  160.97 
  -5   2   3 2919.64  128.87 
   5   2  -3 2762.59  134.99 
   5   2  -3 3080.48  272.26 
   5   2  -3 3082.82  228.33 
  -5  -2   3 3092.76  134.70 
   5  -2  -3 2899.18  147.99 
  -5  -2   3 3053.75  104.13 
   5  -2  -3 2966.71  185.81 
  -5  -2   3 3308.24  325.89 
   5  -2  -3 2727.57  191.04 
   5   2  -2  239.61   54.98 
  -5   2   2  295.32   58.30 
   5   2  -2  271.17  123.43 
   5   2  -2  209.09  111.27 
  -5   2   2  286.98   50.26 
  -5   2   2  176.23   74.38 
  -5  -2   2  211.19   45.46 
  -5  -2   2  158.16   47.87 
   5  -2  -2  304.50  100.35 
   5  -2  -2  207.07   85.44 
  -5  -2   2  197.43  113.40 
   5   2  -1   98.11   91.17 
  -5   2   1  -15.25   35.65 
   5   2  -1   -3.92   51.01 
  -5   2   1   55.76   40.30 
  -5   2   1  -50.00   63.59 
   5   2  -1   32.60   78.59 
   5  -2  -1   10.89   75.25 
  -5  -2   1  -15.59   35.03 
  -5  -2   1  -25.08   93.46 
  -5  -2   1   19.30   36.47 
   5  -2  -1  -28.53   65.57 
  -5   2   0  -11.01   33.89 
   5   2   0   40.09   71.90 
  -5   2   0   -0.22   60.25 
   5   2   0   37.44   78.91 
  -5   2   0  -66.01   35.68 
  -5  -2   0   -0.30   98.58 
  -5  -2   0  -54.32   33.20 
   5  -2   0  -10.67   90.22 
  -5  -2   0   24.07   32.91 
   5  -2   0   -0.23   63.24 
  -5   2  -1  218.90   51.52 
  -5   2  -1  252.55   61.55 
   5   2   1  260.95   91.16 
  -5   2  -1  281.41   74.02 
   5  -2   1  246.71   86.85 
  -5  -2  -1  274.06   62.13 
  -5  -2  -1  197.20   43.54 
  -5  -2  -1  127.03  113.85 
   5  -2   1  207.69  100.00 
  -5   2  -2  132.03   57.84 
  -5   2  -2  130.94   48.61 
  -5   2  -2  144.18   64.85 
   5  -2   2   90.54   83.80 
  -5  -2  -2   51.89  115.02 
  -5  -2  -2  138.59   37.93 
   5  -2   2   44.42   85.28 
  -5  -2  -2   85.54   48.19 
  -5   2  -3  465.66   88.20 
  -5   2  -3  417.23   87.74 
  -5   2  -3  428.16   67.25 
  -5  -2  -3  494.06   55.03 
   5  -2   3  306.95  105.50 
   5  -2   3  433.18   82.53 
  -5  -2  -3  505.27   80.99 
  -5  -2  -3  563.34  180.50 
  -5   2  -4    3.73   42.99 
  -5   2  -4  -56.44   59.34 
  -5   2  -4   35.63   60.51 
   5  -2   4   28.59   74.27 
   5  -2   4   20.17   56.13 
  -5  -2  -4   67.41   48.45 
  -5  -2  -4  -96.40  122.40 
  -5  -2  -4    9.51   29.16 
  -5   2  -5  715.25  122.89 
  -5   2  -5  863.61   99.63 
  -5   2  -5 1036.65  127.54 
  -5  -2  -5  706.62  252.28 
  -5  -2  -5  756.21   99.17 
   5  -2   5  721.34   92.31 
  -5   2  -6  -41.52   66.40 
  -5   2  -6    7.63   74.12 
  -5   2  -6  -10.71   57.52 
  -5  -2  -6    3.95   53.65 
  -5  -2  -6   33.31  256.20 
  -5   2  -7  225.99   95.87 
  -5   2  -7  315.06  129.14 
  -5   2  -7  131.25  101.34 
  -5  -2  -7  264.65   79.93 
  -5   2  -8    2.35   90.92 
  -5   2  -8  148.33  116.24 
  -5   2  -8 -100.79   80.55 
  -5  -2  -8   74.09   69.58 
  -5  -2  -8    8.69   84.05 
  -5   2  -9  397.84  155.89 
  -5   2  -9  229.17  135.10 
  -5  -2  -9   36.23   79.17 
  -5  -2  -9  414.33  132.96 
  -5   2 -10  250.75  183.07 
  -5   2 -10   52.07  133.47 
  -5  -2 -10   64.36  117.67 
   5   3 -10  250.99  329.57 
   5   3 -10  362.26  244.18 
   5  -3 -10  294.18  151.41 
   5  -3 -10  168.88  162.97 
   5   3  -9  -66.66  175.60 
   5   3  -9  125.70  305.22 
   5  -3  -9  -37.22  123.96 
  -5  -3   9  -12.94  229.74 
   5  -3  -9  127.03  119.45 
  -5  -3   9  -17.99   64.02 
   5   3  -8  503.27  216.09 
   5   3  -8  809.15  322.55 
   5  -3  -8  493.99  162.13 
  -5  -3   8  808.28  111.66 
   5  -3  -8  792.04  161.88 
  -5  -3   8  863.19  308.84 
   5   3  -7  883.89  225.01 
   5   3  -7  482.75  150.31 
   5   3  -7  483.51  270.92 
   5  -3  -7  902.23  159.96 
  -5  -3   7  923.05  111.79 
   5  -3  -7  742.72  169.10 
  -5  -3   7  709.26  259.66 
   5   3  -6  -26.23  125.31 
  -5   3   6   82.13   51.02 
   5   3  -6  100.72  113.76 
   5   3  -6   91.37  213.00 
  -5  -3   6   68.75  126.57 
   5  -3  -6   99.40   96.51 
  -5  -3   6   24.21   54.38 
   5  -3  -6   37.16   78.65 
   5   3  -5  -96.51  111.97 
   5   3  -5 -202.20  175.40 
   5   3  -5  131.31  110.49 
  -5   3   5   59.86   96.58 
  -5   3   5   13.18   43.89 
   5  -3  -5  119.66   84.79 
  -5  -3   5  -16.22  107.62 
   5  -3  -5   75.10   98.26 
  -5  -3   5  104.61   57.96 
   5   3  -4   77.90  182.03 
   5   3  -4  173.93   93.62 
   5   3  -4  120.16  125.74 
  -5   3   4  104.23   53.74 
  -5   3   4  142.07   98.04 
   5  -3  -4  144.83   84.24 
  -5  -3   4  104.47   57.93 
  -5  -3   4   25.94  114.77 
  -5  -3   4  124.60   41.81 
   5  -3  -4    1.20   87.40 
   5   3  -3   77.34   44.13 
   5   3  -3  117.32   82.92 
  -5   3   3   78.68   46.76 
   5   3  -3   87.49  155.57 
   5   3  -3   51.09  107.75 
  -5   3   3  -24.78   78.16 
   5  -3  -3   16.48   81.62 
  -5  -3   3   57.33   53.36 
   5  -3  -3  -71.99   74.77 
  -5  -3   3   81.35  140.79 
   5   3  -2  207.60  139.78 
   5   3  -2  179.29  111.08 
  -5   3   2   93.88   90.57 
   5   3  -2  129.82   44.08 
  -5   3   2  207.33   93.96 
  -5   3   2   71.34   48.34 
  -5  -3   2  125.01  144.78 
   5  -3  -2   78.74   83.87 
  -5  -3   2  164.30   61.13 
   5  -3  -2  107.19   93.59 
   5   3  -1  104.51   95.03 
  -5   3   1  119.46   53.64 
   5   3  -1  235.64  119.55 
  -5   3   1  177.08   89.05 
  -5   3   1  148.83   72.93 
   5  -3  -1  320.64  111.27 
  -5  -3   1  183.57   57.45 
   5  -3  -1  176.93   86.00 
  -5  -3   1  148.14  149.43 
  -5   3   0  593.48  102.50 
   5   3   0  581.20  138.57 
  -5   3   0  521.24   81.83 
  -5   3   0  397.42   82.67 
   5   3   0  620.91  110.57 
  -5  -3   0  418.39  184.22 
   5  -3   0  695.25  113.15 
   5  -3   0  608.59  138.35 
  -5  -3   0  516.65   73.15 
   5   3   1  191.00  101.09 
  -5   3  -1   93.93   75.31 
  -5   3  -1  174.87   67.45 
  -5   3  -1   -6.06   47.46 
   5   3   1  143.37   80.60 
   5  -3   1   61.94   71.70 
  -5  -3  -1    3.80  142.49 
   5  -3   1  117.56  104.73 
  -5  -3  -1  124.39   46.93 
  -5   3  -2 1049.50  129.30 
  -5   3  -2 1084.91  131.98 
  -5   3  -2  975.72  101.44 
  -5  -3  -2 1250.18  285.56 
   5  -3   2  931.29  156.96 
  -5  -3  -2 1100.78   92.36 
  -5   3  -3  149.19   77.19 
  -5   3  -3  133.44   84.52 
  -5   3  -3  108.98   56.73 
   5  -3   3   68.12   71.34 
  -5  -3  -3  133.42   43.96 
   5  -3   3  198.42  103.61 
  -5  -3  -3  124.18  179.93 
  -5   3  -4  134.03   82.19 
  -5   3  -4   90.14   60.43 
  -5   3  -4   16.13   77.26 
   5  -3   4  137.56   99.28 
  -5  -3  -4  162.45  214.59 
   5  -3   4   98.75   71.92 
  -5   3  -5  974.15  154.32 
  -5   3  -5 1147.32  135.82 
  -5   3  -5  914.68  132.33 
  -5  -3  -5 1020.78  127.82 
   5  -3   5 1403.76  134.16 
  -5  -3  -5 1214.58  366.46 
  -5   3  -6  170.63  105.82 
  -5   3  -6   -1.37   75.12 
  -5   3  -6  158.28  104.73 
  -5   3  -6   18.54   89.55 
  -5  -3  -6  219.85   80.71 
  -5  -3  -6  457.00  269.64 
   5  -3   6   59.61   61.08 
  -5   3  -7  152.13  124.03 
  -5   3  -7   67.44  111.75 
  -5   3  -7   99.89  102.74 
  -5   3  -7  146.88  100.19 
  -5  -3  -7  295.94   87.61 
  -5   3  -8   26.61  103.36 
  -5   3  -8  -11.73  109.07 
  -5   3  -8 -163.84   99.56 
  -5  -3  -8   68.91   74.17 
  -5   3  -9  122.70  151.68 
  -5   3  -9  128.91  135.20 
  -5  -3  -9  257.24  118.97 
  -5  -3  -9   90.80   85.53 
   5   4 -10  215.89  336.55 
   5   4 -10  261.55  228.96 
   5  -4 -10  630.14  208.17 
   5  -4 -10  629.87  197.09 
  -5  -4  10 1014.75  387.49 
   5   4  -9  373.88  315.49 
   5   4  -9  541.11  226.40 
   5  -4  -9  630.18  186.83 
  -5  -4   9  518.36  108.43 
   5  -4  -9  755.17  182.21 
  -5  -4   9  908.64  323.30 
   5   4  -8  137.80  160.22 
   5   4  -8 -171.25  250.49 
  -5  -4   8  266.39  284.53 
   5  -4  -8   69.88  118.32 
  -5  -4   8  192.05   83.07 
   5  -4  -8  252.28  143.22 
   5   4  -7  100.03  152.92 
   5   4  -7  367.16  165.97 
   5   4  -7 -100.11  210.92 
   5  -4  -7  191.85  123.82 
  -5  -4   7  322.01  232.76 
  -5  -4   7   72.52   68.59 
   5  -4  -7   62.78  102.94 
  -5   4   6   90.86   60.97 
   5   4  -6  -26.82  121.79 
   5   4  -6 -265.37  112.17 
   5   4  -6  101.18  214.80 
  -5  -4   6  115.70  166.77 
  -5  -4   6   18.48   62.93 
   5  -4  -6  -26.18   90.05 
   5  -4  -6   68.83  102.05 
  -5   4   5  254.30  114.68 
   5   4  -5  402.57  221.54 
   5   4  -5  458.12  147.98 
  -5   4   5  293.72   76.72 
   5   4  -5  208.93  142.79 
   5  -4  -5  616.65  134.84 
  -5  -4   5  204.93  177.78 
   5  -4  -5  231.90  112.33 
  -5  -4   5  360.12   87.85 
  -5   4   4   70.56   60.15 
   5   4  -4   35.82  106.58 
   5   4  -4  -78.68  108.63 
  -5   4   4  161.68  100.31 
   5   4  -4   53.11  180.27 
  -5  -4   4  236.54  191.88 
   5  -4  -4  278.50  111.66 
  -5  -4   4  162.11   79.73 
   5  -4  -4  190.98  105.09 
  -5   4   3  155.80  100.34 
   5   4  -3  105.48  168.03 
   5   4  -3  264.10  124.19 
  -5   4   3  143.82   61.36 
   5   4  -3  342.88  119.05 
  -5  -4   3  248.65   79.64 
  -5  -4   3  116.86  186.04 
   5  -4  -3  156.67  101.72 
   5  -4  -3  112.88   97.48 
  -5   4   2  378.69  105.06 
   5   4  -2  269.14  156.41 
   5   4  -2  402.57  126.24 
  -5   4   2  348.23  109.52 
  -5   4   2  325.17   71.71 
   5  -4  -2  425.25  106.99 
  -5  -4   2  234.92   77.55 
  -5  -4   2  221.40  203.02 
   5  -4  -2  333.95  116.81 
  -5   4   1   20.15   98.25 
  -5   4   1  117.34   59.01 
   5   4  -1  130.89  131.78 
   5   4  -1   12.97   79.84 
  -5   4   1  119.61   94.31 
   5  -4  -1  149.80   77.15 
  -5  -4   1  164.30   66.36 
  -5  -4   1  -83.51  162.09 
   5  -4  -1  167.09  122.12 
  -5   4   0  620.71  117.82 
   5   4   0  635.67  105.22 
  -5   4   0  565.86   89.79 
  -5   4   0  611.78  119.40 
   5   4   0  451.15  151.69 
  -5  -4   0  481.06  230.96 
   5  -4   0  490.74  142.71 
   5  -4   0  610.95  109.67 
  -5  -4   0  488.25   81.12 
  -5   4  -1  202.01   96.13 
  -5   4  -1   42.78   86.32 
  -5   4  -1  -37.53   50.60 
   5   4   1   73.16   73.99 
   5   4   1  170.94  110.68 
  -5  -4  -1  196.89  200.96 
   5  -4   1   59.03  104.00 
  -5  -4  -1  106.63   54.31 
   5  -4   1   33.29   72.57 
  -5   4  -2  132.60   68.13 
  -5   4  -2   50.59   82.45 
  -5   4  -2  -31.59   77.34 
  -5  -4  -2   31.30   46.19 
   5  -4   2   24.99   58.79 
   5  -4   2  -25.79   92.55 
  -5  -4  -2   32.44  193.71 
  -5   4  -3  556.26  121.67 
  -5   4  -3  582.22  123.23 
  -5   4  -3  471.88   94.36 
  -5   4  -3  779.01  140.68 
   5  -4   3  569.55  144.93 
  -5  -4  -3  753.70  296.66 
  -5  -4  -3  520.35   75.69 
   5  -4   3  418.32   98.85 
  -5   4  -4  287.88   91.38 
  -5   4  -4  156.88   98.56 
  -5   4  -4  263.78  110.13 
  -5   4  -4  342.24  106.10 
   5  -4   4  195.28  102.67 
   5  -4   4  150.02   74.69 
  -5  -4  -4  406.03  263.41 
  -5   4  -5   98.81   90.59 
  -5   4  -5  155.06   84.69 
  -5   4  -5  102.07   95.39 
  -5   4  -5   74.42   99.34 
   5  -4   5  114.59   70.61 
  -5  -4  -5  217.12  273.97 
   5  -4   5   -0.27   88.78 
  -5   4  -6  104.90   92.91 
  -5   4  -6  234.69  110.37 
  -5   4  -6  -86.99   93.00 
  -5   4  -6  -76.10   87.14 
   5  -4   6   68.67   68.06 
  -5  -4  -6  161.49  253.20 
  -5   4  -7  819.03  160.00 
  -5   4  -7  575.34  141.77 
  -5   4  -7  471.72  165.35 
  -5   4  -7  387.15  161.34 
  -5  -4  -7  635.87  123.72 
  -5   4  -8 1074.48  168.79 
  -5   4  -8 1557.21  290.52 
  -5   4  -8  775.61  208.90 
  -5  -4  -8  864.38  141.06 
  -5   4  -9   45.54  162.85 
  -5   4  -9  421.05  194.87 
  -5  -4  -9  461.78  137.70 
  -5  -4  -9  181.99   92.11 
   5   5  -9 -112.61  255.33 
   5   5  -9  -57.75  177.86 
   5  -5  -9 -107.89  129.36 
  -5  -5   9  318.43  318.04 
  -5  -5   9   -7.37   91.81 
   5   5  -8  -48.44  237.67 
   5   5  -8 -148.10  159.83 
   5   5  -8  108.04  150.39 
   5  -5  -8   77.61  136.23 
  -5  -5   8   -1.07   78.99 
   5  -5  -8   69.80  124.90 
  -5  -5   8  372.67  313.74 
   5   5  -7   29.14  151.79 
   5   5  -7  231.77  164.42 
   5   5  -7   76.89  219.62 
  -5  -5   7  215.10  101.50 
   5  -5  -7   43.83  123.75 
  -5  -5   7  397.77  308.97 
   5  -5  -7  152.33  128.18 
   5   5  -6  904.60  200.36 
   5   5  -6  650.52  194.75 
   5   5  -6  543.14  250.20 
   5  -5  -6  532.36  151.17 
  -5  -5   6 1310.44  409.39 
  -5  -5   6  745.02  142.96 
   5  -5  -6  842.38  165.11 
   5   5  -5  477.19  172.69 
   5   5  -5  939.88  181.30 
   5   5  -5  773.87  248.51 
  -5   5   5  562.67   96.49 
  -5   5   5  819.07  164.92 
   5  -5  -5  830.60  176.24 
  -5  -5   5  583.25  129.74 
   5  -5  -5  911.66  157.78 
  -5  -5   5  727.37  324.38 
  -5   5   4   65.27   98.18 
   5   5  -4   98.62  115.81 
   5   5  -4  204.21  135.47 
   5   5  -4   74.66  172.27 
  -5   5   4  179.72   76.84 
   5  -5  -4  211.43  121.22 
   5  -5  -4   30.09   89.65 
  -5  -5   4   14.52  226.28 
  -5  -5   4  274.12  102.48 
   5   5  -3  195.12  121.91 
  -5   5   3   73.40  100.56 
   5   5  -3   79.35  102.56 
   5   5  -3   79.83  141.47 
  -5   5   3  -43.27   56.70 
   5  -5  -3  -21.45   76.70 
   5  -5  -3   34.76   97.73 
  -5  -5   3   52.30  218.57 
  -5  -5   3   95.00   85.33 
  -5   5   2   -5.19   61.45 
  -5   5   2  121.38   99.70 
  -5   5   2   41.78   94.35 
   5   5  -2   17.97   84.81 
   5   5  -2   27.87  127.99 
   5  -5  -2   87.24   72.94 
  -5  -5   2  -19.32   66.53 
  -5  -5   2    3.64  206.52 
   5  -5  -2   10.45  111.59 
  -5   5   1  431.27  152.40 
  -5   5   1  345.24   85.25 
   5   5  -1  709.10  188.28 
  -5   5   1  382.29  124.47 
  -5  -5   1  468.79   97.65 
   5  -5  -1  463.19  100.60 
   5  -5  -1  476.27  145.80 
  -5  -5   1  338.68  244.10 
   5   5   0  921.39  205.20 
  -5   5   0  805.45  147.61 
  -5   5   0  852.98  120.42 
  -5   5   0  997.95  185.86 
   5  -5   0  988.57  130.29 
  -5  -5   0  993.92  310.90 
  -5  -5   0  739.88  109.48 
   5  -5   0  575.15  146.99 
   5   5   1  149.61  120.82 
  -5   5  -1  223.14  114.08 
  -5   5  -1  336.44  139.97 
  -5   5  -1  171.43   83.41 
  -5   5  -1  278.20   78.35 
   5  -5   1  247.53  120.79 
  -5  -5  -1  215.72   73.63 
   5  -5   1  -15.11   69.79 
  -5  -5  -1  162.38  211.90 
  -5   5  -2  105.50   97.15 
  -5   5  -2   45.78  115.36 
  -5   5  -2  160.79   80.71 
  -5   5  -2  190.30   79.77 
   5  -5   2  132.54   78.72 
   5  -5   2   60.85  108.47 
  -5  -5  -2  -18.68   51.56 
  -5  -5  -2  175.07  244.61 
  -5   5  -3  699.75  137.96 
  -5   5  -3  769.85  136.20 
  -5   5  -3  576.74  120.12 
  -5   5  -3  599.21  153.56 
   5  -5   3  618.97  116.10 
   5  -5   3  536.35  140.39 
  -5  -5  -3  546.57  333.03 
  -5   5  -4   46.39  118.65 
  -5   5  -4  144.84  109.38 
  -5   5  -4   72.73   84.93 
  -5   5  -4  177.32   90.74 
  -5  -5  -4 -182.67  235.60 
   5  -5   4  126.41   74.41 
   5  -5   4  126.10  101.08 
  -5   5  -5  133.60  132.68 
  -5   5  -5  275.85  118.46 
  -5   5  -5  156.72  102.06 
  -5   5  -5  169.72  121.40 
   5  -5   5   -2.64   68.23 
  -5  -5  -5  411.60  320.25 
   5  -5   5  192.11  120.00 
  -5   5  -6  238.06  117.29 
  -5   5  -6  220.73  148.65 
  -5   5  -6  315.89  156.74 
  -5   5  -6  259.91  122.35 
   5  -5   6  421.32   96.76 
  -5  -5  -6  650.19  347.66 
  -5   5  -7  188.98  115.34 
  -5   5  -7 -127.53  140.19 
  -5   5  -7  -43.74  123.60 
  -5  -5  -7  775.30  291.09 
   5  -5   7  -15.51   76.25 
  -5   5  -8 -174.34  154.95 
  -5   5  -8  122.04  145.74 
  -5  -5  -8  122.11   90.59 
   5   6  -8  363.92  252.42 
   5   6  -8  226.50  181.35 
  -5  -6   8  729.69  379.06 
   5  -6  -8  -21.11  152.20 
  -5  -6   8   71.21  102.52 
   5   6  -7  -21.00  202.56 
   5   6  -7   -6.11  127.38 
  -5  -6   7  101.94  113.37 
   5  -6  -7  -71.24  121.37 
  -5  -6   7  950.47  382.66 
   5   6  -6   81.28  152.05 
   5   6  -6   76.22  192.84 
  -5  -6   6  287.94  349.99 
  -5  -6   6  148.48  118.80 
   5  -6  -6   41.49  133.28 
   5   6  -5  435.92  175.16 
   5   6  -5  617.68  240.82 
   5  -6  -5  594.38  175.12 
  -5  -6   5  320.95  394.06 
  -5  -6   5  626.48  148.90 
   5   6  -4  206.05  151.00 
  -5   6   4   69.80  108.54 
   5   6  -4   57.32  163.69 
  -5  -6   4  214.86  360.60 
   5  -6  -4   34.42  120.81 
  -5  -6   4   51.76  104.12 
   5   6  -3  596.77  172.66 
  -5   6   3  702.35  151.76 
  -5   6   3  721.48  118.80 
   5   6  -3  613.83  210.31 
  -5  -6   3  506.35  126.41 
  -5  -6   3  576.57  394.83 
   5  -6  -3  579.86  164.37 
  -5   6   2  558.02  110.50 
  -5   6   2  411.08  131.69 
   5   6  -2  557.48  187.68 
   5  -6  -2  648.05  168.61 
  -5  -6   2  355.88  302.81 
   5  -6  -2  707.87  112.93 
  -5  -6   2  796.11  138.46 
  -5   6   1   89.28   82.80 
  -5   6   1  121.41  107.37 
   5   6  -1  230.78  138.61 
  -5   6   1   65.75  120.57 
   5  -6  -1  -35.26  112.89 
  -5  -6   1   -3.96  229.05 
   5  -6  -1  105.92   72.07 
  -5  -6   1  131.41   84.56 
  -5   6   0  205.68  105.21 
  -5   6   0  124.62  135.19 
   5   6   0  196.78  141.44 
  -5   6   0   84.06   81.93 
   5  -6   0    7.71  102.03 
   5  -6   0  128.20   84.73 
  -5  -6   0  -27.67  227.88 
  -5  -6   0   70.59   79.17 
  -5   6  -1  -26.30   76.44 
   5   6   1   27.60  119.91 
  -5   6  -1   93.72  104.09 
  -5   6  -1 -125.64  135.75 
   5  -6   1  171.05  119.76 
  -5  -6  -1  -31.95   64.58 
   5  -6   1   12.26   81.15 
  -5  -6  -1  -91.27  225.68 
  -5   6  -2  373.76  122.34 
  -5   6  -2  459.02  181.44 
  -5   6  -2  289.17  107.79 
  -5  -6  -2   19.02  278.41 
   5  -6   2  262.80   95.00 
  -5  -6  -2  395.05   94.54 
   5  -6   2  442.95  132.06 
  -5   6  -3  269.84  172.89 
  -5   6  -3 -111.61   86.61 
  -5   6  -3   36.85   86.49 
  -5   6  -3  -10.14  102.02 
   5  -6   3  132.15  107.12 
   5  -6   3  -30.25   64.53 
  -5  -6  -3  -35.42  275.25 
  -5   6  -4   11.76  103.36 
  -5   6  -4  -45.02  102.78 
  -5   6  -4  -33.98   91.78 
  -5   6  -4    8.55  163.75 
   5  -6   4  -30.38   90.92 
  -5  -6  -4 -178.39  278.88 
   5  -6   4  -25.24   71.12 
  -5   6  -5  667.78  174.05 
  -5   6  -5  627.26  145.29 
  -5   6  -5  519.94  202.54 
  -5   6  -5  581.41  145.82 
   5  -6   5  742.93  124.99 
   5  -6   5  428.42  145.72 
  -5  -6  -5  736.45  372.70 
  -5   6  -6  -61.83  116.17 
  -5   6  -6  148.62  112.08 
  -5   6  -6 -197.87  163.56 
  -5  -6  -6  289.89  323.72 
   5  -6   6  -28.30   66.08 
  -5   6  -7  259.40  167.37 
  -5   6  -7  302.90  129.22 
  -5   6  -7  478.98  229.39 
   5  -6   7   93.70   91.53 
   5   7  -7  224.48  213.90 
   5   7  -7   61.87  168.37 
  -5  -7   7  -22.14  116.65 
  -5  -7   7 1027.10  409.78 
   5  -7  -7  -55.88  146.95 
   5   7  -6  300.66  225.27 
   5   7  -6   72.76  154.11 
   5  -7  -6   34.45  153.22 
  -5  -7   6  753.20  445.08 
  -5  -7   6  136.16  126.01 
   5   7  -5   35.18  134.26 
   5   7  -5  217.26  169.04 
  -5  -7   5  -80.99  110.26 
   5  -7  -5   25.09  137.66 
  -5  -7   5  229.33  454.64 
   5   7  -4   50.55  137.31 
   5   7  -4  222.17  163.38 
  -5  -7   4  -36.06  437.95 
   5  -7  -4    8.18  130.48 
  -5  -7   4   31.80  108.76 
   5   7  -3  177.57  168.60 
  -5   7   3  115.73  120.21 
   5   7  -3   54.73  144.99 
   5  -7  -3   48.74  134.94 
  -5  -7   3  -36.12   92.23 
  -5  -7   3  -74.77  424.51 
   5   7  -2   39.18  127.73 
  -5   7   2  147.14  118.68 
   5  -7  -2    9.38  131.58 
  -5  -7   2 -305.96  338.14 
  -5  -7   2  -29.46   89.97 
  -5   7   1  206.29  119.69 
   5   7  -1   64.01  134.18 
  -5   7   1   39.00  104.13 
  -5  -7   1 -509.08  269.46 
  -5  -7   1   29.87   84.53 
   5  -7  -1  -27.91  109.55 
   5  -7  -1    3.26   86.95 
   5   7   0   65.55  108.00 
  -5   7   0  -51.25   93.46 
  -5   7   0  -24.24  144.31 
  -5   7   0   65.86   90.41 
  -5  -7   0   95.71   85.52 
  -5  -7   0  -29.43  321.97 
   5  -7   0   56.01  108.94 
   5  -7   0   60.79   96.07 
  -5   7  -1   68.12  165.35 
  -5   7  -1   36.55   89.66 
  -5   7  -1   16.61  105.45 
   5  -7   1   73.82   81.68 
   5  -7   1   78.49  105.24 
  -5  -7  -1   65.04   77.20 
  -5  -7  -1 -163.15  271.88 
  -5   7  -2  557.15  223.15 
  -5   7  -2  899.49  177.08 
   5  -7   2  942.18  148.35 
  -5  -7  -2  931.48  437.11 
   5  -7   2 1046.82  179.49 
  -5   7  -3   49.75  187.59 
  -5   7  -3  304.51  124.14 
   5  -7   3  -15.35   72.74 
   5  -7   3  186.82  114.28 
  -5  -7  -3 -350.87  311.76 
  -5   7  -4  338.26  132.59 
  -5   7  -4  -89.87  195.25 
   5  -7   4  157.46  118.04 
   5  -7   4  190.46   89.50 
  -5  -7  -4  245.32  380.64 
  -5   7  -5  -99.07  204.14 
  -5   7  -5  164.85  121.06 
   5  -7   5   76.55  104.03 
  -5  -7  -5 -381.55  323.05 
   5  -7   5   46.40   73.40 
  -5   7  -6  417.22  262.17 
  -5   7  -6  603.33  151.78 
  -5  -7  -6 1072.17  409.21 
   5  -7   6  578.65  122.24 
   5   8  -5  401.66  187.93 
   5   8  -5  297.46  185.78 
  -5  -8   5  280.01  147.01 
  -5  -8   5 1186.56  564.57 
   5   8  -4  353.44  168.98 
  -5  -8   4  -55.68  522.65 
   5  -8  -4  214.69  179.89 
  -5  -8   4  421.03  138.72 
  -5  -8   3 -413.66  482.87 
  -5   8   2  532.37  167.20 
   5   8  -2  567.80  186.34 
  -5  -8   2  991.75  540.36 
   5  -8  -2  328.70  158.29 
  -5  -8   2  607.09  139.22 
   5  -8  -2  430.68  146.07 
  -5   8   1  133.50  129.52 
   5   8  -1  111.97  147.44 
  -5  -8   1 -328.50  409.31 
   5  -8  -1  160.23  134.90 
  -5   8   0  584.74  168.12 
   5   8   0  296.46  144.75 
  -5   8   0  396.27  149.74 
   5  -8   0  152.87  129.49 
  -5  -8   0   88.51  426.92 
   5  -8   0  246.84  109.55 
  -5  -8   0  207.41  101.89 
  -5   8  -1  135.06  176.99 
  -5   8  -1  124.95  131.63 
  -5  -8  -1   33.56   89.50 
  -5  -8  -1 -527.22  388.61 
   5  -8   1   78.46  100.36 
   5  -8   1   -8.70  101.50 
  -5   8  -2  101.14  125.01 
  -5   8  -2 -104.67  169.87 
   5  -8   2  107.81   96.35 
  -5  -8  -2 -639.94  376.46 
   5  -8   2  149.40   99.25 
  -5   8  -3  110.89  197.54 
  -5   8  -3  359.12  150.71 
  -5  -8  -3 -126.95  441.17 
   5  -8   3  183.66   98.97 
   5  -8   3  200.40  111.96 
  -5   8  -4  296.94  135.88 
  -5   8  -4 -295.02  196.51 
   5  -8   4  165.08  107.05 
   5  -8   4   67.37   83.79 
  -5  -8  -4 -286.80  413.67 
   5  -9  -1  587.85  167.48 
   5  -9  -1  428.88  140.13 
  -5  -9   0   12.29   91.14 
   5  -9   0  524.84  155.17 
   5  -9   0  107.80  107.10 
   6   0 -10  391.23  154.12 
   6   0 -10  122.19  190.03 
   6   0 -10  -54.84  257.91 
   6   0  -9 -126.41  211.49 
   6   0  -9  -88.86   88.56 
   6   0  -9    9.30  157.53 
   6   0  -8  300.85  211.45 
  -6   0   8  322.39   69.60 
   6   0  -8   31.22  151.52 
   6   0  -8  174.21  104.34 
   6   0  -7  390.85  197.60 
  -6   0   7   26.66   47.01 
   6   0  -7    2.85  130.82 
   6   0  -7   40.78   82.41 
  -6   0   6  353.87   68.47 
   6   0  -6  334.91   97.35 
   6   0  -6  101.07  130.83 
   6   0  -6  356.19  172.54 
   6   0  -5  154.85  124.19 
  -6   0   5    8.03   39.89 
   6   0  -5  -94.49  114.72 
  -6   0   5  -40.62   66.28 
   6   0  -5  116.45   72.73 
  -6   0   4   -7.04   63.26 
   6   0  -4   52.68  102.43 
   6   0  -4   95.36  109.77 
   6   0  -4   16.53   67.52 
  -6   0   4  -49.64   38.79 
  -6   0   4  -78.75   63.12 
   6   0  -3  -39.37  101.54 
   6   0  -3  -12.07   70.85 
  -6   0   3   28.87   40.49 
  -6   0   3  -28.90   56.31 
  -6   0   3  -60.98   57.59 
   6   0  -3  -28.89   61.14 
   6   0  -2 6575.02  281.20 
   6   0  -2 6822.74  259.20 
  -6   0   2 6831.13  192.04 
  -6   0   2 6892.58  372.57 
  -6   0   2 6863.79  190.70 
   6   0  -2 6949.00  313.73 
   6   0  -1   55.84   84.57 
   6   0  -1  100.46   71.98 
  -6   0   1   31.42   34.70 
   6   0  -1   13.62   90.81 
  -6   0   1  -18.91   44.66 
  -6   0   1   85.19   48.56 
  -6   0   0  135.46   52.09 
   6   0   0  102.51   89.89 
   6   0   0  131.47   95.59 
  -6   0   0   49.95   51.02 
  -6   0   0   98.64   38.06 
   6   0   1  -64.33   72.93 
  -6   0  -1   -4.18   29.96 
  -6   0  -1   10.98   42.29 
  -6   0  -1  -40.26   39.66 
   6   0   1   34.22   66.70 
  -6   0  -2 1797.37  115.71 
  -6   0  -2 1778.43  154.18 
   6   0   2 1953.95  215.01 
  -6   0  -2 1697.87   95.44 
   6   0   2 1552.87  124.75 
   6   0   3    5.84   52.57 
  -6   0  -3   23.62   45.85 
  -6   0  -3   40.53   37.03 
  -6   0  -4 1025.09  112.45 
  -6   0  -4 1006.06  130.07 
   6   0   4  940.21   91.46 
  -6   0  -4 1201.85   95.14 
  -6   0  -5   41.54   52.33 
  -6   0  -5  -97.24   52.33 
  -6   0  -6  249.82   79.06 
  -6   0  -6  305.08   94.97 
  -6   0  -7    7.36   62.56 
  -6   0  -7  -75.91   64.41 
  -6   0  -8  626.66  149.51 
  -6   0  -8  562.01  120.24 
  -6   0  -9  -33.54   82.23 
  -6   0  -9  -31.35   89.52 
   6   1 -10  153.16  126.27 
   6   1 -10  -19.48  196.01 
   6   1 -10  503.28  334.44 
   6  -1 -10   21.62   99.48 
   6  -1 -10   82.95  190.37 
   6   1  -9 -149.77  157.12 
   6   1  -9   92.51   94.04 
   6   1  -9   94.64  279.79 
   6  -1  -9  -32.18   78.24 
   6  -1  -9 -157.31  133.45 
   6   1  -8  -16.03   70.93 
   6   1  -8  -31.51  148.13 
   6   1  -8  -24.09  219.60 
   6  -1  -8  -65.97  132.62 
   6  -1  -8   36.43   83.43 
   6  -1  -8  139.89  161.46 
  -6  -1   8   -4.86   52.29 
   6   1  -7  260.65  214.65 
   6   1  -7  402.63  110.95 
  -6   1   7  359.56   71.10 
   6   1  -7  186.29  161.84 
  -6  -1   7  181.96   59.98 
   6  -1  -7  330.18  153.98 
   6  -1  -7  276.00   96.03 
   6  -1  -7  363.41  155.50 
  -6  -1   7  507.89  190.38 
   6   1  -6  571.64  213.13 
   6   1  -6  687.13  189.51 
  -6   1   6  766.60   87.12 
   6   1  -6  583.36  116.39 
   6  -1  -6  742.21  170.61 
  -6  -1   6  525.69  159.55 
  -6  -1   6  822.62   89.55 
   6  -1  -6  687.91  132.66 
   6  -1  -6  530.24  155.53 
   6   1  -5  837.14  186.00 
  -6   1   5  956.50  111.07 
   6   1  -5 1083.94  139.59 
   6   1  -5  994.94  238.43 
  -6   1   5  931.17   91.55 
   6  -1  -5  879.34  134.41 
  -6  -1   5  804.92  178.38 
   6  -1  -5 1184.30  193.38 
  -6  -1   5  947.02   95.77 
   6  -1  -5 1144.17  177.45 
   6   1  -4  -27.77   54.53 
  -6   1   4   49.64   45.13 
   6   1  -4  136.23  121.08 
   6   1  -4   30.42  120.51 
  -6   1   4   79.39   72.35 
  -6  -1   4   36.21   43.66 
  -6  -1   4  -12.27   74.56 
   6  -1  -4   52.35   84.49 
   6  -1  -4   15.86   69.30 
   6  -1  -4  106.37  110.11 
  -6  -1   4   -9.13   53.74 
   6   1  -3  -17.90  112.01 
   6   1  -3   22.19  104.20 
  -6   1   3  238.21   60.18 
  -6   1   3   95.79   74.85 
  -6   1   3  126.67   31.48 
   6   1  -3  246.04   74.12 
  -6  -1   3  108.59   86.55 
   6  -1  -3  175.60   86.96 
   6  -1  -3  122.57  106.19 
  -6  -1   3  144.44   51.22 
   6  -1  -3  133.67   83.07 
  -6  -1   3  132.77   50.17 
  -6   1   2  155.75   38.58 
   6   1  -2  103.76   87.76 
   6   1  -2  116.38  114.05 
  -6   1   2   52.23   40.78 
   6   1  -2   -0.66   64.22 
  -6   1   2  -19.51   65.94 
  -6  -1   2   78.67   44.82 
  -6  -1   2   -9.16   67.93 
   6  -1  -2  -49.14   84.68 
  -6  -1   2  -11.93   38.49 
   6  -1  -2    2.96   81.49 
   6  -1  -2   39.82   61.69 
  -6   1   1  441.30  100.87 
   6   1  -1  738.90  139.18 
  -6   1   1  724.47   94.13 
  -6   1   1  566.17   70.73 
   6   1  -1  974.21  164.10 
  -6   1   1  728.49   77.13 
   6   1  -1  623.61  110.39 
  -6  -1   1  371.47  111.49 
  -6  -1   1  622.75   73.33 
   6  -1  -1  678.32  132.56 
   6  -1  -1  700.83  132.07 
  -6  -1   1  567.98   68.06 
   6   1   0  177.23   69.17 
  -6   1   0  303.10   58.28 
  -6   1   0  265.81   68.13 
  -6   1   0  224.59   56.18 
  -6   1   0  190.11   65.02 
   6   1   0  113.90  100.68 
  -6  -1   0  131.75   50.34 
  -6  -1   0  204.67   94.49 
  -6  -1   0  205.23   46.83 
   6  -1   0  212.46  115.14 
   6  -1   0  153.26   91.01 
  -6   1  -1 1951.16  123.87 
   6   1   1 2168.80  213.58 
   6   1   1 2069.55  108.77 
  -6   1  -1 2107.10  123.39 
  -6   1  -1 2030.62  106.43 
   6  -1   1 2044.77  178.37 
  -6  -1  -1 2014.45  255.87 
  -6  -1  -1 1922.08  100.19 
  -6  -1  -1 1982.02  117.46 
   6  -1   1 2066.22  202.97 
   6   1   2  937.97   82.54 
  -6   1  -2  726.02   89.33 
  -6   1  -2  912.13   83.91 
   6   1   2  811.55  154.95 
  -6   1  -2  943.86  109.74 
   6  -1   2  849.36  147.57 
  -6  -1  -2  839.91   74.04 
  -6  -1  -2  947.08  165.98 
  -6  -1  -2  723.73   90.49 
   6  -1   2  821.36  127.77 
  -6   1  -3  800.29   87.29 
  -6   1  -3  853.47   99.51 
  -6   1  -3 1006.49  121.68 
  -6  -1  -3  916.75  168.86 
  -6  -1  -3 1087.83   84.85 
  -6  -1  -3 1061.82  112.88 
   6  -1   3  787.98  128.37 
  -6   1  -4  807.32  118.82 
  -6   1  -4  949.74   95.45 
  -6   1  -4  873.97  110.47 
  -6  -1  -4  956.59   83.04 
   6  -1   4  995.24  111.30 
  -6  -1  -4  915.61  107.36 
  -6  -1  -4 1040.81  202.87 
   6  -1   4  903.11  132.57 
  -6   1  -5  -31.23   60.27 
  -6   1  -5   19.22   50.77 
  -6   1  -5  -24.98   54.20 
   6  -1   5    4.24   45.30 
  -6  -1  -5    9.17   51.84 
  -6   1  -6 1675.20  188.29 
  -6   1  -6 1529.08  148.58 
  -6  -1  -6 1360.90  169.43 
  -6  -1  -6 1504.40  150.41 
  -6   1  -7 -104.75   61.80 
  -6   1  -7  -35.27   78.41 
  -6  -1  -7   25.42   59.79 
  -6  -1  -7  -62.24   69.33 
  -6   1  -8  597.17  126.82 
  -6   1  -8  583.72  144.34 
  -6  -1  -8  708.38  123.27 
  -6  -1  -8  808.22  154.85 
  -6   1  -9   27.14  108.02 
  -6   1  -9 -139.45   83.80 
  -6   1  -9  611.52  153.59 
  -6  -1  -9   82.18  116.41 
  -6  -1  -9  -66.26   78.94 
   6   2 -10   82.56  105.05 
   6   2 -10  -36.86  196.92 
   6   2 -10  139.57  315.70 
   6  -2 -10  -49.16  107.58 
   6  -2 -10 -208.42  136.32 
   6   2  -9  925.08  169.72 
   6   2  -9  698.42  248.16 
   6   2  -9  713.21  332.11 
   6  -2  -9  956.93  229.49 
   6  -2  -9  718.34  169.42 
  -6  -2   9  924.82  117.37 
   6   2  -8  185.93  178.78 
   6   2  -8  306.56   99.77 
   6   2  -8 -138.39  213.48 
   6  -2  -8   32.97  131.77 
  -6  -2   8   88.83   62.10 
  -6  -2   8   48.97  193.00 
   6  -2  -8   84.16  100.89 
   6   2  -7   68.54  153.39 
  -6   2   7  -46.79   42.68 
   6   2  -7  125.11   72.34 
   6   2  -7  296.63  244.13 
  -6  -2   7  -49.57   46.29 
   6  -2  -7   48.17   84.63 
  -6  -2   7   41.25  144.85 
   6  -2  -7  102.22  125.46 
   6   2  -6   37.38   64.71 
   6   2  -6  259.65  219.69 
   6   2  -6   59.78  145.10 
  -6   2   6    9.54   43.88 
   6  -2  -6   96.52   86.66 
   6  -2  -6  -64.66   80.12 
  -6  -2   6   60.82  120.94 
  -6  -2   6  -60.62   39.53 
   6  -2  -6  -60.31   96.54 
   6   2  -5  312.17  212.64 
   6   2  -5  320.23  157.37 
   6   2  -5  230.07   79.29 
  -6   2   5  304.06   95.88 
  -6   2   5  279.84   64.64 
  -6  -2   5  213.27   58.81 
   6  -2  -5   20.03   75.15 
   6  -2  -5  194.56   83.28 
   6  -2  -5  211.17  120.45 
  -6  -2   5  131.08  114.52 
  -6   2   4   10.26   79.72 
   6   2  -4  -23.86  142.24 
  -6   2   4   13.63   46.89 
   6   2  -4  143.13   64.31 
   6   2  -4   84.83  125.96 
  -6  -2   4  -35.13   89.09 
  -6  -2   4    0.92   42.95 
   6  -2  -4   84.67   81.87 
  -6  -2   4   92.99   46.14 
   6  -2  -4   45.82   66.54 
   6  -2  -4 -125.70   92.04 
   6   2  -3  535.75  157.68 
  -6   2   3  217.81   63.04 
   6   2  -3  227.24  143.51 
   6   2  -3  199.92   68.03 
  -6   2   3  162.98   86.92 
  -6  -2   3  143.80  115.77 
   6  -2  -3  156.02  112.31 
  -6  -2   3  183.13   58.57 
   6  -2  -3  135.18   98.81 
   6  -2  -3  301.59   80.10 
  -6  -2   3  302.44   54.88 
   6   2  -2    5.17  103.13 
  -6   2   2  -25.16   82.27 
  -6   2   2   18.26   45.53 
  -6   2   2   13.05   42.52 
   6   2  -2   45.32  115.45 
   6   2  -2  -32.76   56.08 
  -6  -2   2  -26.83   38.29 
   6  -2  -2  -73.68   78.34 
  -6  -2   2   -7.02  100.24 
   6  -2  -2   29.98   86.18 
  -6  -2   2   16.74   37.22 
   6   2  -1   52.66   87.20 
   6   2  -1  -50.64   62.72 
  -6   2   1  109.88   86.51 
   6   2  -1  -32.84  100.24 
  -6   2   1   61.46   47.62 
  -6   2   1  133.42   53.15 
  -6  -2   1   92.84   45.02 
  -6  -2   1   85.47   43.78 
   6  -2  -1  247.21  118.79 
  -6  -2   1   94.04  116.11 
   6  -2  -1   32.01   86.43 
  -6   2   0  268.14   85.90 
  -6   2   0  253.54   61.50 
   6   2   0  303.98  104.03 
   6   2   0  437.06  119.79 
  -6   2   0  235.18   59.82 
   6   2   0  461.61   47.25 
   6  -2   0  424.49  108.39 
  -6  -2   0  396.63  157.25 
   6  -2   0  385.03  134.69 
  -6  -2   0  408.50   63.72 
  -6  -2   0  404.89   68.52 
  -6   2  -1 1913.12  131.63 
  -6   2  -1 2129.13  149.16 
   6   2   1 2081.09  211.20 
  -6   2  -1 1976.08  118.29 
   6  -2   1 1822.43  185.60 
   6  -2   1 2347.50  225.56 
  -6  -2  -1 1904.27  278.76 
  -6  -2  -1 1831.46  104.94 
  -6  -2  -1 2087.79  124.23 
  -6   2  -2  -24.87   41.98 
  -6   2  -2   11.82   54.81 
   6   2   2  -45.51   83.71 
  -6   2  -2   -4.56   63.48 
  -6  -2  -2  -42.52   41.87 
  -6  -2  -2   49.63  144.76 
   6  -2   2   41.43   89.86 
   6  -2   2  -16.67   80.07 
  -6  -2  -2   22.14   34.51 
  -6   2  -3 1105.81  134.40 
  -6   2  -3  796.87   92.36 
  -6   2  -3  741.32  112.29 
  -6  -2  -3  896.83  110.47 
   6  -2   3  627.06  132.43 
   6  -2   3  868.17  113.03 
  -6  -2  -3  914.08   79.39 
  -6  -2  -3  556.86  226.50 
  -6   2  -4  517.81  108.76 
  -6   2  -4  304.24   91.79 
  -6   2  -4  406.77   77.27 
  -6  -2  -4  417.09  231.01 
  -6  -2  -4  358.20   79.38 
   6  -2   4  419.31   90.36 
   6  -2   4  321.38  104.92 
  -6   2  -5 2557.58  180.31 
  -6   2  -5 2177.16  184.40 
  -6   2  -5 2940.42  162.65 
   6  -2   5 2604.38  154.25 
  -6  -2  -5 2680.20  163.46 
  -6   2  -6  311.33  110.25 
  -6   2  -6  323.52   88.88 
  -6   2  -6  393.85  106.81 
  -6  -2  -6  218.01   78.59 
  -6   2  -7  292.19  109.28 
  -6   2  -7  214.41  108.41 
  -6  -2  -7  265.67   87.42 
  -6   2  -8  111.78  103.23 
  -6   2  -8  315.65  128.68 
  -6   2  -8  176.53  113.43 
  -6  -2  -8  119.59   87.26 
  -6  -2  -8   97.62  101.57 
  -6   2  -9 1677.46  243.16 
  -6   2  -9 1660.00  198.80 
  -6   2  -9 1940.28  303.74 
  -6  -2  -9 1666.54  183.17 
  -6  -2  -9 1757.06  238.29 
   6   3 -10   55.68  215.78 
   6   3 -10  340.08  119.31 
   6   3 -10 -199.13  265.64 
   6  -3 -10 -254.72  126.48 
   6  -3 -10  -59.87  119.55 
   6   3  -9 -104.88  166.27 
   6   3  -9 -441.59  237.99 
   6   3  -9  260.26  115.43 
  -6  -3   9   -0.76   67.12 
  -6  -3   9  120.57  276.67 
   6  -3  -9  -38.26  114.96 
   6  -3  -9 -229.35  112.27 
   6   3  -8 -115.23  153.82 
   6   3  -8  147.48   80.95 
   6   3  -8 -213.09  238.13 
  -6  -3   8   34.75   68.70 
   6  -3  -8   11.92   95.51 
   6  -3  -8  179.72  137.88 
  -6  -3   8  165.35  217.32 
   6   3  -7  258.72   81.31 
   6   3  -7  -48.18  148.00 
   6   3  -7  -10.13  227.63 
  -6  -3   7  156.55   71.59 
   6  -3  -7   84.70   95.57 
   6  -3  -7  152.34  127.34 
  -6  -3   7   40.39  192.66 
   6   3  -6  205.10  106.79 
   6   3  -6  129.36  153.56 
  -6   3   6  158.16   60.06 
   6   3  -6  114.35  231.72 
   6   3  -6  370.03   92.39 
  -6  -3   6  245.47  185.70 
  -6  -3   6  187.96   68.88 
   6  -3  -6  212.98  110.02 
   6  -3  -6  162.81  117.11 
   6   3  -5  978.27  276.79 
  -6   3   5  812.06   93.27 
   6   3  -5 1325.54  148.33 
   6   3  -5  883.72  206.80 
  -6   3   5  996.93  151.38 
   6  -3  -5  852.84  169.59 
   6  -3  -5  836.47  159.25 
  -6  -3   5  807.74  107.79 
  -6  -3   5  878.02  232.81 
  -6   3   4 1184.23  148.28 
   6   3  -4 1107.15  127.65 
   6   3  -4  689.58  228.68 
   6   3  -4 1345.23  220.69 
  -6   3   4 1086.19  106.37 
  -6  -3   4 1112.42   84.84 
   6  -3  -4 1040.14  164.18 
   6  -3  -4 1025.69  167.35 
  -6  -3   4  814.38  218.63 
  -6  -3   4 1161.57  115.94 
   6   3  -3  297.08  169.54 
   6   3  -3    4.65  123.21 
  -6   3   3  211.11   64.47 
  -6   3   3  123.68  102.58 
   6   3  -3  261.95   71.11 
  -6  -3   3  153.53  149.88 
  -6  -3   3  211.85   63.81 
   6  -3  -3  199.34  109.92 
   6  -3  -3  122.51  103.08 
  -6  -3   3  266.40   57.18 
  -6   3   2  -40.30   68.32 
  -6   3   2  117.17   92.63 
   6   3  -2   74.84  113.59 
   6   3  -2  294.19  133.24 
  -6   3   2   89.04   55.80 
   6  -3  -2  146.54  103.02 
   6  -3  -2   65.15   95.05 
  -6  -3   2   76.13   48.20 
  -6  -3   2  155.44   59.64 
  -6  -3   2   19.90  144.76 
  -6   3   1  143.79   97.11 
  -6   3   1  247.18   73.99 
   6   3  -1  212.65  106.06 
  -6   3   1  233.88   64.65 
   6   3  -1  208.37  128.11 
  -6  -3   1  231.82   63.30 
  -6  -3   1  247.96  195.57 
  -6  -3   1  336.44   69.29 
   6  -3  -1  197.46   95.21 
   6  -3  -1  141.30  121.80 
   6   3   0  280.74  119.24 
  -6   3   0  274.49   68.02 
   6   3   0  479.72  117.01 
  -6   3   0  250.59   78.53 
  -6   3   0  308.03  101.21 
   6  -3   0  589.71  156.16 
  -6  -3   0  415.65   70.05 
  -6  -3   0  464.49  221.41 
   6  -3   0  391.53  103.82 
   6   3   1 2408.65  184.91 
  -6   3  -1 2829.28  152.55 
  -6   3  -1 2610.61  163.18 
  -6   3  -1 2593.84  176.18 
   6  -3   1 2420.76  218.82 
  -6  -3  -1 2681.82  403.83 
   6  -3   1 2691.22  238.49 
  -6  -3  -1 2785.15  134.37 
  -6   3  -2   -1.76   46.66 
  -6   3  -2   14.23   65.76 
  -6   3  -2   83.01   79.12 
  -6  -3  -2 -101.32  218.87 
  -6  -3  -2  121.94   50.51 
  -6  -3  -2   24.79   51.37 
   6  -3   2    2.31  100.06 
  -6   3  -3   43.06   84.65 
  -6   3  -3   26.32   52.50 
  -6   3  -3   96.29   77.44 
   6  -3   3   19.35   64.54 
  -6  -3  -3 -146.79  228.79 
   6  -3   3   45.82   97.28 
  -6  -3  -3   56.01   43.67 
  -6  -3  -3  -68.85   44.47 
  -6   3  -4 1182.18  152.58 
  -6   3  -4 1287.75  163.12 
  -6   3  -4 1065.71  118.90 
  -6  -3  -4 1393.19  403.32 
   6  -3   4 1481.13  145.76 
  -6  -3  -4 1098.53  128.68 
   6  -3   4  993.72  168.34 
  -6   3  -5 -118.93   64.51 
  -6   3  -5 -190.94   73.84 
  -6   3  -5  112.49   76.52 
  -6  -3  -5  -24.53   51.66 
   6  -3   5   17.75   87.81 
   6  -3   5   -1.09   61.68 
  -6  -3  -5 -197.76  270.13 
  -6   3  -6  997.84  139.51 
  -6   3  -6  810.33  161.35 
  -6   3  -6  785.48  138.24 
   6  -3   6  892.84  104.85 
  -6  -3  -6  690.04  118.39 
  -6   3  -7  508.92  140.12 
  -6   3  -7  337.94  131.28 
  -6   3  -7  873.62  190.00 
  -6  -3  -7  724.58  127.50 
  -6   3  -8  131.99  133.20 
  -6   3  -8  159.75  122.50 
  -6   3  -8  273.35  128.82 
  -6  -3  -8   87.43   84.10 
  -6   3  -9  205.56  144.63 
  -6   3  -9  120.76  147.76 
  -6  -3  -9  237.41  114.12 
  -6  -3  -9  172.85  120.59 
   6   4  -9  -60.76  272.86 
   6   4  -9  301.27  211.01 
   6  -4  -9   31.85  134.20 
  -6  -4   9  155.22  298.36 
  -6  -4   9    0.50   81.61 
   6  -4  -9   14.12  146.42 
   6   4  -8   31.64  174.02 
   6   4  -8 -120.30  226.48 
  -6  -4   8  -68.45   65.96 
   6  -4  -8  -60.24  114.41 
   6  -4  -8   24.12  128.62 
  -6  -4   8  319.20  300.85 
   6   4  -7  161.29  168.35 
   6   4  -7  538.75  277.21 
  -6  -4   7  542.77  307.56 
   6  -4  -7  575.28  163.99 
   6  -4  -7  208.85  129.12 
  -6  -4   7  278.24   89.15 
   6   4  -6  237.41  160.25 
  -6   4   6  -18.00   59.50 
   6   4  -6  124.62  112.01 
   6   4  -6   -5.89  208.89 
   6  -4  -6  -83.40  106.05 
   6  -4  -6  195.17  125.87 
  -6  -4   6  186.15  222.80 
  -6  -4   6   83.64   73.64 
   6   4  -5   -0.61  103.54 
  -6   4   5  302.14  107.64 
  -6   4   5   79.48   56.90 
   6   4  -5  247.46  144.50 
   6   4  -5  -42.44  186.65 
  -6  -4   5  112.86  181.83 
   6  -4  -5  -55.81   96.85 
   6  -4  -5  127.55  118.56 
  -6  -4   5   -6.82   62.09 
   6   4  -4 -117.43  113.51 
  -6   4   4   91.76   93.05 
  -6   4   4    6.52   54.26 
   6   4  -4 -112.28  149.91 
   6  -4  -4   18.67  104.63 
  -6  -4   4   99.71   71.87 
  -6  -4   4  172.35  189.28 
   6  -4  -4   88.05  102.35 
   6   4  -3  947.50  178.65 
  -6   4   3  802.54  133.66 
  -6   4   3  651.14   91.78 
   6   4  -3  751.47  231.82 
   6  -4  -3  603.98  145.12 
  -6  -4   3  809.83  276.01 
   6  -4  -3  947.37  148.86 
  -6  -4   3  806.25  117.87 
   6   4  -2 2297.46  305.32 
   6   4  -2 2833.85  252.00 
  -6   4   2 2638.84  146.48 
  -6   4   2 2285.78  204.76 
  -6  -4   2 2444.35  429.49 
   6  -4  -2 2786.21  199.52 
  -6  -4   2 2468.48  167.40 
   6  -4  -2 2439.04  238.37 
  -6   4   1  997.22  151.42 
  -6   4   1 1015.02  112.58 
   6   4  -1 1135.50  224.10 
   6   4  -1 1149.16  156.79 
  -6   4   1 1311.37  159.77 
   6  -4  -1 1056.74  146.33 
  -6  -4   1  885.67  318.66 
   6  -4  -1  756.51  168.72 
  -6  -4   1  843.14  107.49 
  -6   4   0  157.68   98.50 
  -6   4   0  157.19  108.01 
   6   4   0   20.32  101.97 
   6   4   0   97.20   82.88 
  -6   4   0   -0.85   55.22 
   6  -4   0   89.51   77.67 
  -6  -4   0   11.16  224.95 
  -6  -4   0  128.27   63.86 
   6  -4   0   45.13  116.12 
  -6   4  -1  395.56  115.94 
  -6   4  -1  103.06   62.56 
   6   4   1  293.43  100.32 
  -6   4  -1  573.36  125.74 
  -6  -4  -1  300.33   72.61 
   6  -4   1  215.03   94.15 
   6  -4   1  438.68  144.31 
  -6  -4  -1  435.35  297.72 
  -6   4  -2  619.26  124.62 
  -6   4  -2  587.85   96.27 
  -6   4  -2  591.33  123.39 
   6  -4   2  511.12  102.10 
  -6  -4  -2  622.70  342.22 
   6  -4   2  452.54  146.70 
  -6  -4  -2  611.62   88.34 
  -6   4  -3  461.24  120.44 
  -6   4  -3  467.25  118.30 
  -6   4  -3  673.65  108.98 
  -6  -4  -3  669.08  371.35 
   6  -4   3  585.60  158.38 
   6  -4   3  440.02  104.69 
  -6   4  -4  387.91  122.26 
  -6   4  -4  418.48  101.99 
  -6   4  -4  260.40  115.45 
  -6  -4  -4  408.96  378.13 
   6  -4   4  532.38  147.76 
   6  -4   4  232.15   83.01 
  -6   4  -5  -73.85   82.88 
  -6   4  -5   26.26   76.97 
  -6   4  -5  -46.89   92.03 
  -6   4  -5   98.14   85.13 
  -6  -4  -5    9.03   63.71 
   6  -4   5  -90.11   82.58 
  -6  -4  -5 -418.73  295.16 
   6  -4   5   34.65   70.67 
  -6   4  -6  222.45  106.47 
  -6   4  -6  410.92  145.63 
  -6   4  -6  317.16  137.92 
  -6   4  -6  252.76  126.78 
  -6  -4  -6  279.28   92.05 
   6  -4   6  195.66   80.14 
  -6  -4  -6  431.81  337.24 
  -6   4  -7 -156.11  105.38 
  -6   4  -7  -97.88   94.92 
  -6   4  -7  -28.73  113.05 
  -6   4  -7  112.19  111.73 
  -6  -4  -7   -9.90   70.48 
  -6   4  -8  235.03  170.90 
  -6   4  -8  691.30  207.10 
  -6   4  -8   52.59  129.74 
  -6  -4  -8  352.37  115.95 
   6   5  -8 -152.04  163.63 
   6   5  -8  133.54  254.70 
   6  -5  -8   -3.61  137.44 
   6  -5  -8   37.40  137.35 
  -6  -5   8  441.05  353.68 
  -6  -5   8   98.13   93.79 
   6   5  -7  544.58  273.37 
   6   5  -7  617.77  202.08 
  -6  -5   7  479.46  129.07 
  -6  -5   7 1485.05  442.66 
   6  -5  -7  791.82  202.62 
   6  -5  -7  632.95  180.16 
   6   5  -6  413.75  246.01 
   6   5  -6  582.19  189.42 
   6   5  -6  348.06  155.30 
  -6  -5   6  865.09  384.48 
   6  -5  -6  559.01  167.45 
  -6  -5   6  654.35  136.57 
   6  -5  -6  565.50  163.70 
   6   5  -5   -1.92  122.75 
  -6   5   5  139.10   73.05 
   6   5  -5  404.39  197.07 
  -6   5   5  150.86  107.19 
   6   5  -5  140.20  125.18 
  -6  -5   5   34.31  271.34 
   6  -5  -5   88.22  122.05 
   6  -5  -5   45.36  116.79 
  -6  -5   5  167.80  101.96 
   6   5  -4   40.84  122.32 
  -6   5   4  131.43   73.92 
   6   5  -4  297.97  183.33 
  -6   5   4   78.55   91.79 
  -6  -5   4   -4.25   85.12 
  -6  -5   4  124.06  268.15 
   6  -5  -4   27.68   98.08 
   6  -5  -4   48.08  123.14 
  -6   5   3   35.51   58.32 
   6   5  -3  -40.96  136.60 
   6   5  -3   90.21  114.48 
  -6   5   3   54.25   93.37 
   6  -5  -3  -53.52  111.35 
   6  -5  -3  -34.23   79.45 
  -6  -5   3   23.08  270.09 
  -6  -5   3  -49.13   78.19 
   6   5  -2   13.68  135.29 
   6   5  -2   57.93  104.95 
  -6   5   2   91.79   97.47 
  -6   5   2  173.60   69.79 
   6  -5  -2   11.70   73.76 
  -6  -5   2    2.76  259.57 
  -6  -5   2   -0.32   71.54 
   6  -5  -2  176.51  131.32 
   6   5  -1   33.36  122.78 
  -6   5   1   23.00  122.69 
  -6   5   1  133.50   73.55 
  -6   5   1  261.76  114.81 
   6  -5  -1  148.99   78.51 
  -6  -5   1  157.51   79.30 
   6  -5  -1  101.38  128.77 
  -6  -5   1  207.58  282.38 
  -6   5   0  608.05  106.00 
  -6   5   0  834.99  172.71 
   6   5   0  719.75  185.74 
  -6   5   0  904.33  154.56 
   6  -5   0  727.09  126.20 
  -6  -5   0  715.26  357.14 
  -6  -5   0  652.67  108.46 
   6  -5   0  947.27  182.31 
  -6   5  -1  454.58  129.35 
  -6   5  -1  255.43  132.65 
  -6   5  -1  139.99   78.55 
  -6  -5  -1  115.36   72.25 
  -6  -5  -1  204.52  313.21 
   6  -5   1  147.45  120.24 
  -6   5  -2  215.73   91.79 
  -6   5  -2  419.13  126.93 
  -6   5  -2  333.09  139.12 
  -6   5  -2  506.86   99.76 
   6  -5   2  176.39   84.27 
   6  -5   2  252.84  128.17 
  -6  -5  -2  230.17  335.29 
  -6  -5  -2  208.70   75.62 
  -6   5  -3 2029.81  172.17 
  -6   5  -3 1882.86  205.86 
  -6   5  -3 1872.29  183.84 
  -6   5  -3 2239.46  249.98 
   6  -5   3 1996.93  234.30 
   6  -5   3 1837.32  176.93 
  -6  -5  -3 2762.20  580.05 
  -6   5  -4  340.29   95.36 
  -6   5  -4  -36.48  111.25 
  -6   5  -4  281.92  120.69 
  -6   5  -4  -23.24   90.20 
   6  -5   4  125.10   75.56 
   6  -5   4  180.01  114.30 
  -6  -5  -4 -363.77  327.82 
  -6   5  -5   -5.71  112.85 
  -6   5  -5  157.67  109.82 
  -6   5  -5  121.21  107.77 
  -6   5  -5  -39.22  126.07 
   6  -5   5   95.51  111.25 
   6  -5   5  162.57   80.84 
  -6  -5  -5  -54.29  336.69 
  -6   5  -6  607.89  198.13 
  -6   5  -6  745.22  189.41 
  -6   5  -6  672.24  154.54 
  -6   5  -6  701.43  165.81 
  -6  -5  -6  483.25  365.34 
   6  -5   6  369.40   95.47 
  -6   5  -7  518.91  150.96 
  -6   5  -7  423.63  203.74 
  -6   5  -7  865.37  220.03 
  -6   5  -7  531.31  160.34 
  -6  -5  -7  573.18  129.50 
   6   6  -7  256.59  233.62 
   6   6  -7  456.12  192.21 
  -6  -6   7  723.39  396.15 
  -6  -6   7  354.11  133.46 
   6  -6  -7   82.54  155.58 
   6   6  -6  -51.09  118.57 
   6   6  -6  153.69  194.03 
  -6  -6   6  541.73  391.43 
  -6  -6   6   40.50  111.33 
   6  -6  -6 -179.79  121.63 
   6   6  -5  205.02  190.73 
  -6   6   5  126.91   83.47 
   6   6  -5  105.88  139.21 
  -6   6   5  189.19  126.99 
  -6  -6   5  105.12  118.52 
   6  -6  -5   35.54  142.49 
  -6  -6   5  771.08  393.85 
  -6   6   4  123.82   90.44 
  -6   6   4    9.85   98.94 
   6   6  -4   45.44  175.33 
  -6  -6   4  291.28  433.40 
  -6  -6   4  248.36  116.74 
   6  -6  -4  128.33  140.07 
  -6   6   3  124.18   83.18 
  -6   6   3   69.43  108.55 
   6   6  -3 -169.39  113.83 
   6  -6  -3  196.71  136.82 
  -6  -6   3 -202.46  335.34 
   6  -6  -3   86.89   79.52 
  -6  -6   3   81.44   99.88 
  -6   6   2 -100.17   67.57 
   6   6  -2   67.87  138.41 
  -6   6   2   98.17  104.20 
  -6  -6   2  145.63   99.94 
   6  -6  -2 -139.64  115.41 
  -6  -6   2   82.91  333.46 
   6  -6  -2   -2.10   73.05 
  -6   6   1  238.34  120.28 
  -6   6   1  242.74   91.03 
   6   6  -1  322.35  177.14 
   6  -6  -1  548.07  168.23 
  -6  -6   1  441.62  113.94 
   6  -6  -1  460.27  113.03 
  -6  -6   1  462.26  384.14 
  -6   6   0  658.31  183.91 
  -6   6   0  361.45  124.35 
  -6   6   0  403.98  106.30 
   6   6   0  337.79  163.95 
   6  -6   0  545.72  159.79 
  -6  -6   0  384.35  101.75 
  -6  -6   0  467.28  382.41 
  -6   6  -1  457.66  137.61 
  -6   6  -1  202.88   97.32 
  -6   6  -1  365.08  174.59 
   6  -6   1   70.32   89.76 
  -6  -6  -1  234.30   90.34 
  -6  -6  -1  188.44  368.87 
   6  -6   1  213.15  132.97 
  -6   6  -2  -81.37   95.17 
  -6   6  -2  213.99  173.88 
  -6   6  -2   29.56   91.91 
   6  -6   2   67.91   79.21 
   6  -6   2   60.77  105.29 
  -6  -6  -2 -106.41  344.85 
  -6   6  -3  117.54  119.45 
  -6   6  -3   36.89   96.39 
  -6   6  -3  453.95  200.08 
  -6  -6  -3 -349.61  363.16 
   6  -6   3  -82.40   62.66 
   6  -6   3   13.70   99.56 
  -6   6  -4 1264.71  188.66 
  -6   6  -4 1308.43  193.99 
  -6   6  -4 1236.92  237.16 
   6  -6   4 1125.40  149.81 
   6  -6   4 1141.87  207.76 
  -6  -6  -4  902.36  471.32 
  -6   6  -5  285.49  192.35 
  -6   6  -5  256.29  121.15 
  -6   6  -5  304.42  134.99 
  -6   6  -5   61.86  113.25 
   6  -6   5   88.45   82.80 
   6  -6   5  143.90  127.86 
  -6  -6  -5   37.17  385.46 
  -6   6  -6 1313.84  233.47 
  -6   6  -6  711.90  242.87 
  -6   6  -6 1098.47  203.35 
  -6   6  -6 1144.58  192.66 
  -6  -6  -6  687.22  423.74 
   6  -6   6 1157.54  146.72 
   6   7  -6  216.54  192.20 
   6   7  -6  108.68  159.92 
   6  -7  -6   22.01  160.65 
  -6  -7   6   -6.24  114.85 
  -6  -7   6  541.10  428.64 
   6   7  -5  -93.37  136.40 
   6   7  -5 -324.85  139.52 
   6  -7  -5   40.15  161.89 
  -6  -7   5  275.44  464.07 
  -6  -7   5  186.20  139.18 
  -6   7   4 1509.44  234.14 
   6   7  -4 1622.31  302.87 
  -6  -7   4 1967.00  239.04 
  -6  -7   4 2603.81  687.16 
   6  -7  -4 1667.23  269.67 
   6   7  -3   49.86  151.13 
  -6   7   3   95.69  116.95 
  -6  -7   3  243.74  473.64 
  -6  -7   3  -38.89  107.96 
   6  -7  -3  -51.76  132.42 
  -6  -7   2   22.46  439.99 
   6   7  -1  170.35  136.29 
  -6   7   1   34.97   84.87 
  -6   7   1   63.88  115.66 
  -6  -7   1   22.79   83.70 
  -6  -7   1  -95.09  416.42 
   6  -7  -1   40.36  126.58 
   6   7   0  631.52  183.97 
  -6   7   0  665.47  161.35 
  -6   7   0  963.82  208.23 
  -6   7   0  589.62  133.94 
   6  -7   0  815.44  153.97 
   6  -7   0 1000.50  202.59 
  -6  -7   0  968.37  143.43 
  -6  -7   0 1097.83  528.08 
  -6   7  -1   32.46  169.42 
  -6   7  -1  235.97  131.69 
  -6   7  -1  275.81  122.52 
  -6  -7  -1  266.56  442.23 
   6  -7   1  146.75  100.64 
  -6  -7  -1  337.59  102.44 
   6  -7   1  336.14  138.21 
  -6   7  -2  284.44  201.03 
  -6   7  -2  507.55  138.88 
  -6   7  -2  352.68  129.51 
   6  -7   2  403.75  115.79 
   6  -7   2  218.31  120.97 
  -6  -7  -2   27.58  451.10 
  -6   7  -3   10.61  108.82 
  -6   7  -3   38.30  198.86 
  -6   7  -3   49.31  109.79 
   6  -7   3  121.34   93.00 
  -6  -7  -3 -343.40  397.39 
   6  -7   3  188.68  116.38 
  -6   7  -4  422.86  247.99 
  -6   7  -4  928.33  177.51 
  -6   7  -4  291.23  138.92 
  -6  -7  -4   13.79  430.33 
   6  -7   4  501.64  153.10 
   6  -7   4  393.23  107.97 
  -6   7  -5  215.31  125.51 
  -6   7  -5 -130.54  224.74 
   6  -7   5   67.41   81.58 
  -6  -7  -5 -607.66  405.93 
   6  -7   5   76.51  122.65 
  -6   8   3  396.27  164.77 
   6   8  -3  411.25  181.06 
  -6  -8   3  837.39  631.66 
   6  -8  -3  265.66  135.60 
  -6  -8   3  559.95  148.71 
   6  -8  -3  254.64  186.20 
  -6   8   2  271.08  159.22 
  -6  -8   2  -73.56  540.61 
  -6   8   1 1144.91  216.77 
   6   8  -1 1014.54  226.53 
  -6  -8   1  807.85  577.59 
   6  -8  -1  941.44  175.04 
   6  -8  -1  675.01  179.54 
  -6  -8   1  937.85  153.07 
  -6   8   0   85.81  124.57 
   6   8   0  161.31  165.79 
   6  -8   0   59.56  123.94 
  -6  -8   0  166.33  100.95 
   6  -8   0  234.41  120.78 
  -6  -8   0   22.74  502.02 
  -6   8  -1  715.59  211.10 
  -6   8  -1  346.61  148.81 
  -6  -8  -1 -272.99  515.35 
   6  -8   1  310.03  117.24 
   6  -8   1  382.95  135.52 
  -6   8  -2  106.35  123.35 
  -6   8  -2  116.17  205.14 
   6  -8   2  117.27   94.84 
   6  -8   2   31.76  102.94 
  -6  -8  -2 -427.30  442.09 
  -6   8  -3  135.82  229.56 
  -6   8  -3  403.48  154.96 
   6  -8   3  368.99  135.15 
   6  -8   3  289.67  107.13 
  -6  -8  -3 -179.93  476.85 
   7   0 -10  -63.23  201.53 
   7   0 -10  518.24  166.02 
   7   0  -9  243.95  209.68 
   7   0  -9   13.51   98.92 
   7   0  -9  -22.82  165.55 
   7   0  -8 1912.26  312.15 
  -7   0   8 2128.37  142.04 
   7   0  -8 2055.46  227.16 
   7   0  -8 2081.73  317.15 
   7   0  -7   40.79  149.87 
   7   0  -7   14.05   80.83 
   7   0  -7   49.74  142.79 
  -7   0   7  -54.02   45.45 
   7   0  -6  514.04  168.90 
   7   0  -6  269.69  152.89 
  -7   0   6  260.95   68.06 
   7   0  -6  174.62   89.38 
  -7   0   5   13.15   99.52 
   7   0  -5  -53.11   65.34 
  -7   0   5   24.42   44.98 
   7   0  -5  -13.79  105.33 
   7   0  -5  -77.37  120.75 
  -7   0   4  -68.74   41.40 
  -7   0   4   51.01   85.17 
  -7   0   4  157.38   81.62 
   7   0  -4  109.44  124.45 
   7   0  -4  138.26  101.08 
   7   0  -4  106.93   88.69 
   7   0  -3 -265.92   90.27 
   7   0  -3   57.41   91.47 
  -7   0   3   15.60   74.33 
   7   0  -3 -105.49   74.47 
  -7   0   3   43.37   70.89 
  -7   0   3  -10.21   43.75 
   7   0  -2   50.37   77.76 
   7   0  -2  190.72  128.31 
  -7   0   2   50.93   77.51 
   7   0  -2  115.14  104.34 
  -7   0   2  235.87   60.60 
  -7   0   2  -19.47   58.71 
  -7   0   1   34.44   45.16 
   7   0  -1 -136.24  100.89 
  -7   0   1   24.76   51.22 
  -7   0   1   -2.73   66.45 
   7   0  -1   17.09  109.07 
  -7   0   0   70.71   72.15 
  -7   0   0   17.43   52.72 
   7   0   0  176.41  110.78 
   7   0   0   63.50   95.14 
  -7   0   0  176.05   51.57 
  -7   0  -1  -20.81   38.00 
  -7   0  -1   44.98   56.75 
  -7   0  -1   36.58   53.51 
   7   0   1  -45.67   67.91 
   7   0   1  -49.01   87.49 
  -7   0  -2 3880.94  179.48 
  -7   0  -2 3857.04  154.30 
  -7   0  -2 4359.70  240.04 
   7   0   2 3866.33  272.21 
   7   0   2 4027.60  187.21 
  -7   0  -3   -7.94   40.61 
  -7   0  -3    7.70   52.30 
   7   0   3   92.00   62.90 
  -7   0  -4   84.95   62.09 
   7   0   4   54.03   60.25 
  -7   0  -4  -14.34   60.66 
  -7   0  -4  -25.63   37.52 
  -7   0  -5   -3.75   61.97 
  -7   0  -5   44.22   66.18 
  -7   0  -6 1014.20  136.02 
  -7   0  -6 1177.32  169.77 
  -7   0  -7   98.64   79.19 
  -7   0  -7  -86.52   64.36 
  -7   0  -8  957.11  144.95 
  -7   0  -8  636.85  162.06 
  -7   0  -9  -32.50  107.38 
  -7   0  -9  -58.08   87.68 
   7   1 -10    8.38  110.60 
   7   1 -10  156.96  242.93 
   7   1 -10  190.90  213.64 
   7  -1 -10 -242.82  149.38 
   7  -1 -10  -23.70  106.62 
   7   1  -9   78.58  181.82 
   7   1  -9  267.77  126.93 
   7   1  -9  322.14  265.96 
  -7  -1   9  539.86  100.34 
   7  -1  -9  257.05  179.61 
   7  -1  -9  243.48  122.97 
   7   1  -8  228.26  213.71 
   7   1  -8   88.44   90.63 
  -7   1   8  111.70   67.54 
   7   1  -8  136.41  171.16 
   7  -1  -8   96.11  153.04 
   7  -1  -8  230.44  112.01 
  -7  -1   8  241.28   76.86 
  -7   1   7   48.43   52.20 
   7   1  -7   22.15   72.18 
   7   1  -7 -125.67  148.84 
   7   1  -7  136.41  198.04 
   7  -1  -7  335.88  143.79 
   7  -1  -7  -14.17  130.95 
  -7  -1   7 -131.46  138.63 
   7  -1  -7   50.97   85.73 
  -7  -1   7 -101.10   43.79 
  -7   1   6  718.59   91.31 
   7   1  -6  846.98  142.20 
   7   1  -6  695.55  203.60 
   7   1  -6  745.41  222.12 
   7  -1  -6  879.11  167.90 
   7  -1  -6  653.76  140.73 
   7  -1  -6  826.00  191.70 
  -7  -1   6  707.36   94.64 
  -7  -1   6  781.61  217.98 
   7   1  -5  726.71  190.65 
   7   1  -5 1001.45  147.03 
  -7   1   5 1151.86  109.46 
   7   1  -5  897.91  213.90 
   7  -1  -5  946.08  155.02 
   7  -1  -5  740.99  174.35 
  -7  -1   5  955.02  100.32 
   7  -1  -5 1019.86  168.24 
  -7  -1   5  887.79  206.71 
   7   1  -4 1590.78  246.50 
   7   1  -4 1405.14  232.74 
  -7   1   4 1520.89  149.66 
  -7   1   4 1476.78  110.41 
   7   1  -4 1576.33  164.87 
  -7  -1   4 1286.76  118.94 
   7  -1  -4 1810.11  201.67 
  -7  -1   4 1322.45  111.96 
   7  -1  -4 1635.13  191.65 
  -7  -1   4 1268.50  230.79 
   7  -1  -4 1498.10  225.86 
   7   1  -3  193.78  118.03 
   7   1  -3  434.21  157.01 
  -7   1   3  366.20   70.78 
  -7   1   3  560.83  113.33 
   7   1  -3  266.74   96.44 
   7  -1  -3  297.24  102.95 
  -7  -1   3  151.60   58.46 
   7  -1  -3  188.25  124.98 
  -7  -1   3  300.54  133.49 
   7  -1  -3  135.95  100.19 
  -7  -1   3  375.75   71.74 
   7   1  -2 1985.56  175.59 
   7   1  -2 2186.72  257.60 
  -7   1   2 1907.40  122.39 
  -7   1   2 2116.21  157.57 
   7   1  -2 2116.23  203.37 
  -7   1   2 1927.24  102.14 
  -7  -1   2 2023.66  123.60 
  -7  -1   2 1839.14  268.81 
  -7  -1   2 1797.39  120.93 
   7  -1  -2 1854.88  205.98 
   7  -1  -2 1942.56  220.72 
  -7   1   1  198.15   52.95 
  -7   1   1  262.27   59.00 
   7   1  -1  160.81  126.93 
   7   1  -1   41.48   99.15 
  -7   1   1  242.79   83.82 
   7   1  -1  187.94   96.29 
  -7  -1   1  293.27   66.32 
  -7  -1   1  217.49   60.03 
   7  -1  -1  269.31  116.86 
  -7  -1   1  138.28  101.59 
   7  -1  -1  276.51  132.85 
  -7   1   0  140.15   54.58 
   7   1   0   50.44  108.36 
   7   1   0   58.84   68.36 
  -7   1   0  122.15   69.64 
  -7   1   0   29.71   41.91 
  -7  -1   0  -42.99   43.76 
  -7  -1   0   25.64   41.68 
   7  -1   0  -30.05  109.47 
  -7  -1   0   94.43   91.91 
   7  -1   0  106.07   96.62 
  -7   1  -1  305.58   73.37 
   7   1   1  379.07   67.93 
   7   1   1  206.20  111.57 
  -7   1  -1  286.07   61.59 
  -7   1  -1  390.70   82.49 
   7  -1   1  305.23  114.69 
   7  -1   1  450.24  135.30 
  -7  -1  -1  313.92  113.78 
  -7  -1  -1  290.56   58.15 
  -7  -1  -1  295.35   69.21 
   7   1   2 1875.68  113.02 
  -7   1  -2 1918.89  137.05 
  -7   1  -2 1796.08  113.80 
  -7   1  -2 1609.68  130.01 
   7   1   2 2038.06  244.61 
  -7  -1  -2 1644.55  102.30 
  -7  -1  -2 1648.64  126.03 
   7  -1   2 1650.51  205.82 
   7  -1   2 1862.34  183.73 
  -7  -1  -2 1929.54  278.70 
  -7   1  -3   63.30   59.72 
  -7   1  -3   98.21   65.14 
  -7   1  -3   73.39   49.53 
  -7  -1  -3  -38.15   45.24 
  -7  -1  -3  139.68  133.13 
  -7  -1  -3   58.82   44.91 
   7  -1   3   48.50   75.08 
  -7   1  -4   34.05   51.37 
  -7   1  -4   39.33   61.77 
  -7   1  -4  -13.76   59.27 
  -7  -1  -4   41.76   55.09 
   7  -1   4    7.03   65.49 
   7  -1   4  -75.77   60.91 
  -7  -1  -4  -28.12   40.50 
  -7   1  -5 1872.54  149.08 
  -7   1  -5 1645.68  176.06 
  -7   1  -5 1713.63  162.87 
  -7  -1  -5 1615.37  159.94 
  -7   1  -6   66.16   73.01 
  -7   1  -6  121.04   86.25 
  -7  -1  -6  171.92   95.59 
  -7  -1  -6  105.63   73.85 
  -7   1  -7   86.26   97.99 
  -7   1  -7  145.86   96.78 
  -7  -1  -7  201.65   88.60 
  -7  -1  -7  268.75  108.67 
  -7   1  -8   -7.03   92.22 
  -7   1  -8  -10.47   99.95 
  -7  -1  -8   -5.05   88.26 
  -7  -1  -8   14.90   82.89 
  -7   1  -9 -150.60   98.59 
  -7   1  -9   60.77  119.04 
  -7  -1  -9  -43.38  102.44 
  -7  -1  -9  -29.01  115.99 
   7   2  -9  585.52  165.33 
   7   2  -9  291.24  214.70 
   7   2  -9  523.97  302.59 
   7  -2  -9  441.00  195.93 
   7  -2  -9  309.06  152.56 
  -7  -2   9  214.70   81.86 
   7   2  -8   74.44  180.87 
   7   2  -8  -69.52   84.08 
   7   2  -8   70.74  231.67 
   7  -2  -8   28.66  105.39 
  -7  -2   8   21.33   59.95 
   7  -2  -8  152.37  147.36 
  -7  -2   8   58.24  217.98 
   7   2  -7  116.19  180.63 
  -7   2   7  216.52   70.31 
   7   2  -7  413.21  239.48 
   7   2  -7  227.73  108.57 
  -7  -2   7  322.73   79.90 
   7  -2  -7  231.82  145.00 
   7  -2  -7  124.80  102.09 
  -7  -2   7  152.93  163.38 
  -7   2   6   77.90   60.31 
   7   2  -6  276.62  170.36 
   7   2  -6  383.06  109.69 
   7   2  -6  215.74  206.34 
  -7  -2   6  345.65  192.33 
   7  -2  -6   27.33  100.74 
  -7  -2   6  164.02   68.53 
   7  -2  -6  363.88  148.96 
   7   2  -5 1678.05  259.45 
   7   2  -5 1671.15  299.41 
  -7   2   5 1840.45  165.55 
  -7   2   5 1791.07  128.47 
   7   2  -5 1747.19  179.43 
  -7  -2   5 1877.82  135.57 
   7  -2  -5 1746.88  185.74 
   7  -2  -5 1473.02  217.05 
  -7  -2   5 2385.33  383.39 
   7  -2  -5 1710.43  205.92 
  -7   2   4  450.28  105.30 
   7   2  -4  537.44  110.19 
  -7   2   4  553.02   86.08 
   7   2  -4  198.01  157.46 
   7   2  -4  209.43  159.30 
   7  -2  -4  199.66  129.67 
  -7  -2   4  268.63  143.04 
  -7  -2   4  386.33   78.97 
   7  -2  -4  377.24  122.17 
   7  -2  -4  517.74  109.72 
  -7   2   3 1003.24  106.75 
   7   2  -3  887.01  199.74 
   7   2  -3 1229.57  143.66 
  -7   2   3 1028.90  139.94 
   7   2  -3 1297.52  233.55 
  -7  -2   3  977.09  220.00 
   7  -2  -3  984.63  167.76 
  -7  -2   3 1087.34  100.15 
   7  -2  -3 1117.98  189.16 
  -7  -2   3 1128.06  112.78 
   7   2  -2   95.75  133.52 
   7   2  -2  107.77   87.52 
  -7   2   2   27.37   46.61 
   7   2  -2    3.01   99.27 
  -7   2   2   13.20   50.84 
  -7   2   2  124.90  105.61 
   7  -2  -2  144.46  116.96 
  -7  -2   2   68.80  119.02 
  -7  -2   2   20.09   45.73 
   7  -2  -2  224.51  114.67 
  -7  -2   2   -2.02   46.57 
   7   2  -1 4762.45  304.83 
   7   2  -1 4753.72  298.62 
  -7   2   1 4939.49  222.26 
  -7   2   1 5003.59  191.35 
  -7   2   1 5041.40  180.29 
  -7  -2   1 4721.73  181.35 
  -7  -2   1 5061.31  187.46 
  -7  -2   1 5497.62  467.43 
   7  -2  -1 4965.77  274.77 
   7  -2  -1 5134.55  299.98 
   7   2   0  775.00  158.99 
  -7   2   0  736.43   98.36 
  -7   2   0  705.09  117.12 
  -7   2   0  762.66   95.34 
   7  -2   0  690.65  170.31 
   7  -2   0  780.57  150.18 
  -7  -2   0  749.96   85.02 
  -7  -2   0  941.66  105.25 
  -7  -2   0  911.11  240.30 
  -7   2  -1  639.53   88.62 
  -7   2  -1  726.02  105.94 
  -7   2  -1  527.65  105.87 
   7   2   1  648.98  151.99 
   7  -2   1  586.11  154.99 
   7  -2   1 1002.44  169.18 
  -7  -2  -1  832.88  258.92 
  -7  -2  -1  738.37   83.50 
  -7  -2  -1  704.59   94.97 
   7   2   2   63.15  104.53 
  -7   2  -2  141.96   78.99 
  -7   2  -2  120.42   57.57 
  -7   2  -2   80.94   61.66 
  -7  -2  -2   23.19  188.90 
   7  -2   2  125.72  101.28 
  -7  -2  -2   62.99   55.99 
  -7  -2  -2   33.06   42.63 
   7  -2   2  -47.48   87.89 
  -7   2  -3   85.04   78.77 
  -7   2  -3    2.54   58.75 
  -7   2  -3   29.70   54.44 
  -7  -2  -3   37.66   58.60 
   7  -2   3   80.18   85.06 
  -7  -2  -3  -34.94   40.37 
  -7  -2  -3  152.63  214.64 
  -7   2  -4  -66.95   68.45 
  -7   2  -4  -33.53   64.10 
  -7   2  -4  153.88   64.13 
  -7  -2  -4   63.03   59.63 
   7  -2   4   13.63   79.25 
   7  -2   4   89.95   71.43 
  -7   2  -5  252.44   79.09 
  -7   2  -5  208.52   97.02 
  -7   2  -5  312.05  107.66 
  -7  -2  -5  272.64   86.75 
   7  -2   5  317.16   84.67 
  -7   2  -6   86.26   92.46 
  -7   2  -6  -20.05   88.00 
  -7  -2  -6   35.79   67.93 
  -7   2  -7 -136.60   88.03 
  -7   2  -7  -60.03   88.35 
  -7  -2  -7   50.31   78.76 
  -7  -2  -7  158.26  103.86 
  -7   2  -8   -8.08  106.15 
  -7   2  -8  -72.46   98.97 
  -7   2  -8  427.05  120.79 
  -7  -2  -8  -12.07   81.37 
  -7  -2  -8   68.39  105.53 
   7   3  -9  572.85  330.47 
   7   3  -9  635.30  267.70 
   7   3  -9  646.33  161.37 
   7  -3  -9  342.51  155.35 
  -7  -3   9  534.26  113.13 
  -7  -3   9  790.13  381.66 
   7  -3  -9  663.61  202.30 
   7   3  -8  170.04   97.86 
   7   3  -8 -145.41  169.58 
   7   3  -8  205.24  261.08 
   7  -3  -8  128.75  153.66 
  -7  -3   8  178.83  249.68 
   7  -3  -8  112.92  129.54 
  -7  -3   8   36.88   75.23 
   7   3  -7  139.96  221.65 
   7   3  -7  -66.88  162.42 
   7   3  -7  321.25  111.98 
  -7   3   7   52.10   56.74 
  -7  -3   7    5.68   65.85 
  -7  -3   7  295.42  267.57 
   7  -3  -7 -157.00   85.08 
   7  -3  -7  124.38  132.95 
  -7   3   6 1132.08  119.02 
   7   3  -6 1052.69  166.23 
   7   3  -6  768.63  262.40 
   7   3  -6 1167.71  245.59 
   7  -3  -6 1204.23  212.48 
  -7  -3   6 1400.06  351.92 
   7  -3  -6  719.86  167.74 
  -7  -3   6 1085.37  128.96 
   7   3  -5  659.64  202.93 
  -7   3   5  788.39  130.63 
   7   3  -5  692.32  194.10 
  -7   3   5  702.23   96.19 
   7   3  -5  587.22  245.12 
  -7  -3   5  622.76  105.08 
  -7  -3   5  405.40  210.59 
   7  -3  -5  570.54  156.41 
   7  -3  -5  558.38  155.34 
  -7   3   4  339.76   81.16 
  -7   3   4  700.73  127.63 
   7   3  -4  499.69  199.12 
   7   3  -4  375.14  162.39 
  -7  -3   4  497.17   90.68 
  -7  -3   4  404.41  191.43 
   7  -3  -4  464.34  144.29 
   7  -3  -4  368.37  139.16 
  -7   3   3  370.63  115.01 
   7   3  -3   65.63  132.31 
  -7   3   3  328.70   81.00 
   7   3  -3  328.19  170.96 
  -7  -3   3  268.44   66.27 
  -7  -3   3  486.88   90.44 
  -7  -3   3  302.50  180.78 
   7  -3  -3  315.16  128.01 
   7  -3  -3  215.77  132.12 
   7   3  -2  759.56  175.72 
  -7   3   2  695.17   95.73 
   7   3  -2  745.34  189.54 
  -7   3   2  589.07  131.13 
   7  -3  -2  845.61  158.99 
  -7  -3   2  749.71   97.53 
  -7  -3   2  753.64  261.51 
   7  -3  -2  636.46  153.45 
  -7  -3   2  723.28  103.08 
   7   3  -1 1099.39  181.64 
   7   3  -1  925.84  190.42 
  -7   3   1  914.27  116.72 
  -7   3   1  921.40  106.38 
  -7   3   1 1203.21  156.81 
   7  -3  -1  861.97  147.01 
  -7  -3   1 1022.40  107.68 
   7  -3  -1 1048.95  189.10 
  -7  -3   1 1047.56  115.64 
  -7  -3   1 1161.45  326.20 
   7   3   0   64.85   92.69 
   7   3   0   66.91   98.39 
  -7   3   0  134.33  101.54 
  -7   3   0  -30.20   51.06 
  -7   3   0   -8.11   60.07 
   7  -3   0   35.17  123.86 
  -7  -3   0    5.27   47.93 
  -7  -3   0   71.27  243.34 
  -7  -3   0   12.08   50.14 
   7  -3   0   95.83   82.40 
  -7   3  -1  -60.15   80.94 
  -7   3  -1   22.30   70.92 
  -7   3  -1   -4.58   55.09 
   7   3   1   60.14   92.06 
   7  -3   1  207.88  127.10 
  -7  -3  -1 -109.00  253.02 
  -7  -3  -1   29.88   51.60 
  -7  -3  -1    6.64   51.56 
   7  -3   1  -23.37   80.75 
  -7   3  -2 1153.84  125.48 
  -7   3  -2 1153.74  148.04 
  -7   3  -2 1117.54  146.84 
  -7  -3  -2 1615.42  423.33 
  -7  -3  -2 1105.60  105.69 
   7  -3   2 1002.97  177.74 
  -7  -3  -2 1006.82  123.99 
  -7   3  -3  608.88  123.21 
  -7   3  -3  442.26  116.07 
  -7   3  -3  895.02  116.73 
  -7  -3  -3  679.90  377.98 
   7  -3   3  530.77  135.55 
   7  -3   3  721.25  123.07 
  -7  -3  -3  619.51   87.42 
  -7  -3  -3  635.85  110.08 
  -7   3  -4  522.16  100.56 
  -7   3  -4  574.97  134.32 
  -7   3  -4  563.71  130.08 
   7  -3   4  453.22  102.54 
  -7  -3  -4  226.36  364.55 
   7  -3   4  501.45  132.02 
  -7  -3  -4  533.57  105.79 
  -7   3  -5  917.28  127.93 
  -7   3  -5 1086.77  160.51 
  -7   3  -5 1164.46  179.97 
  -7  -3  -5 1091.26  146.74 
   7  -3   5 1108.34  136.89 
   7  -3   5 1088.55  179.72 
  -7   3  -6  -73.25   91.76 
  -7   3  -6   18.03  101.25 
  -7   3  -6   13.20   80.24 
  -7  -3  -6   77.27   75.62 
  -7   3  -7   94.76  124.59 
  -7   3  -7  354.74  129.44 
  -7   3  -7   11.90  108.02 
  -7  -3  -7  132.64   89.93 
  -7   3  -8  231.87  118.13 
  -7   3  -8  -38.57  123.00 
  -7   3  -8  -61.81  114.42 
  -7  -3  -8  128.25  116.81 
  -7  -3  -8   34.27   97.34 
   7   4  -8  764.82  256.13 
   7   4  -8  563.88  303.96 
   7  -4  -8  899.90  204.12 
  -7  -4   8 1646.00  456.11 
   7  -4  -8  728.22  200.94 
  -7  -4   8  946.74  150.18 
   7   4  -7  706.64  287.05 
   7   4  -7  624.34  228.10 
  -7  -4   7  504.39  116.26 
   7  -4  -7  670.38  175.12 
  -7  -4   7  677.06  360.83 
   7  -4  -7  709.22  182.57 
  -7   4   6   14.41   67.30 
   7   4  -6   18.76  162.80 
   7   4  -6  334.93  221.67 
   7  -4  -6  130.08  139.37 
   7  -4  -6   25.34  111.96 
  -7  -4   6  248.70  261.66 
  -7  -4   6   83.97   82.89 
  -7   4   5  200.18   99.61 
   7   4  -5   44.65  168.30 
   7   4  -5  -86.90  135.72 
  -7   4   5   61.21   66.56 
   7  -4  -5  -88.79  102.77 
   7  -4  -5  -40.86  109.94 
  -7  -4   5  245.26  241.62 
  -7  -4   5  -32.13   66.74 
   7   4  -4 -147.60  123.52 
   7   4  -4  -62.65  128.29 
  -7   4   4   48.74   91.46 
  -7   4   4    3.39   56.08 
   7  -4  -4 -114.35   91.91 
   7  -4  -4  153.99  125.90 
  -7  -4   4  -17.64   70.11 
  -7  -4   4  -27.66  203.66 
   7   4  -3  156.86  132.28 
   7   4  -3  -50.16  130.91 
  -7   4   3 -112.14   44.99 
  -7   4   3   57.62   94.74 
  -7  -4   3  155.93   61.49 
  -7  -4   3   -9.30   64.15 
  -7  -4   3  173.39  224.91 
   7  -4  -3   62.80   99.21 
   7  -4  -3  -18.06  104.94 
  -7   4   2  -13.33   55.43 
  -7   4   2   23.65  102.02 
   7   4  -2    6.39  122.53 
   7   4  -2  -72.18  105.33 
  -7  -4   2   64.35   60.57 
   7  -4  -2  -49.80   77.57 
   7  -4  -2   51.69  125.65 
  -7  -4   2   42.72  240.77 
  -7  -4   2  -47.23   54.80 
  -7   4   1   37.26  101.98 
  -7   4   1   61.30   61.40 
  -7   4   1  -14.01  101.49 
   7   4  -1   63.69   95.40 
   7   4  -1  -39.11  114.79 
  -7  -4   1 -121.59  275.95 
  -7  -4   1    7.51   55.05 
   7  -4  -1  -51.96   66.09 
  -7  -4   1  -10.69   52.80 
   7  -4  -1  125.71  123.90 
   7   4   0  209.59  102.09 
  -7   4   0   81.63  103.96 
  -7   4   0  176.14   74.57 
  -7   4   0  150.88  100.35 
   7   4   0   79.02  120.61 
   7  -4   0  162.55  127.65 
  -7  -4   0  194.96   66.08 
  -7  -4   0  221.79   74.61 
   7  -4   0  172.59   98.74 
  -7  -4   0  527.64  348.33 
   7   4   1  721.09  139.75 
  -7   4  -1  521.86   96.42 
  -7   4  -1  478.49  118.86 
  -7   4  -1  350.72  122.00 
  -7  -4  -1  372.32   80.16 
   7  -4   1  521.47  159.92 
  -7  -4  -1  409.48   93.81 
  -7  -4  -1  407.12  380.07 
   7  -4   1  357.73  112.93 
  -7   4  -2 2246.09  163.79 
  -7   4  -2 1943.20  196.15 
  -7   4  -2 1801.09  188.51 
  -7  -4  -2 2030.63  555.12 
  -7  -4  -2 1935.96  137.82 
  -7  -4  -2 1590.79  159.43 
   7  -4   2 1992.55  240.82 
  -7   4  -3  493.38  106.73 
  -7   4  -3  615.24  140.83 
  -7   4  -3  390.88  131.94 
   7  -4   3  419.25  144.16 
  -7  -4  -3  370.69  100.78 
   7  -4   3  391.07  106.55 
  -7  -4  -3  -75.27  404.74 
  -7   4  -4  -68.86   87.84 
  -7   4  -4   25.76  105.75 
  -7   4  -4   41.49   73.45 
   7  -4   4   63.72   73.17 
  -7  -4  -4   49.66   69.58 
   7  -4   4  167.15  111.44 
  -7   4  -5   86.17  125.02 
  -7   4  -5   58.80  110.50 
  -7   4  -5  129.27   93.73 
  -7   4  -5  326.51  118.53 
  -7  -4  -5  -12.36   71.30 
   7  -4   5  194.47  123.63 
  -7  -4  -5 -703.55  356.25 
   7  -4   5   43.24   78.97 
  -7   4  -6  337.85  144.45 
  -7   4  -6  680.94  147.73 
  -7   4  -6   86.91  103.32 
  -7   4  -6  351.25  136.93 
  -7  -4  -6  437.50  114.98 
   7  -4   6  169.31   84.59 
  -7   4  -7  621.18  162.88 
  -7   4  -7  706.57  200.62 
  -7   4  -7  644.34  159.87 
  -7  -4  -7  560.95  131.53 
   7   5  -8 -126.59  170.05 
   7   5  -8  285.54  257.82 
  -7  -5   8  -34.58   95.50 
   7  -5  -8  -10.58  158.16 
  -7  -5   8  559.72  410.26 
   7  -5  -8   80.82  160.06 
   7   5  -7  448.84  240.17 
   7   5  -7  141.30  181.62 
   7  -5  -7  277.43  155.91 
   7  -5  -7  -34.66  139.89 
  -7  -5   7  122.04  100.89 
  -7  -5   7  875.86  404.80 
   7   5  -6  232.13  211.45 
   7   5  -6  -80.78  137.36 
  -7  -5   6  210.16  290.37 
   7  -5  -6   39.81  134.30 
   7  -5  -6 -150.25  120.21 
  -7  -5   6  -18.41   78.18 
  -7   5   5  386.81  134.86 
   7   5  -5  200.05  200.32 
   7   5  -5  504.96  186.47 
  -7   5   5  352.80  100.57 
   7  -5  -5  493.96  150.68 
  -7  -5   5  254.64  104.01 
  -7  -5   5  871.90  402.96 
   7  -5  -5  155.89  149.04 
   7   5  -4  547.14  168.52 
   7   5  -4  505.38  223.75 
  -7   5   4  590.88  111.04 
  -7   5   4  546.39  138.84 
   7  -5  -4  556.71  171.42 
   7  -5  -4 1047.02  181.19 
  -7  -5   4  661.90  131.37 
  -7  -5   4 1132.22  414.85 
  -7   5   3 1946.21  221.17 
  -7   5   3 1782.47  167.86 
   7   5  -3 2557.99  294.48 
   7   5  -3 2038.59  341.42 
  -7  -5   3 1862.42  193.95 
  -7  -5   3 2388.59  563.43 
   7  -5  -3 1803.90  206.61 
   7  -5  -3 2133.81  267.87 
  -7  -5   3 2320.71  163.81 
  -7   5   2  557.44  104.01 
  -7   5   2  355.51  120.79 
   7   5  -2  360.89  178.85 
  -7  -5   2  449.17  101.96 
   7  -5  -2  530.80  169.57 
  -7  -5   2  448.48  390.23 
   7  -5  -2  407.20  113.81 
  -7   5   1   64.05  111.64 
   7   5  -1  -46.74  118.06 
  -7   5   1  112.38   73.84 
  -7  -5   1  -70.22   59.00 
  -7  -5   1  186.01  374.44 
   7  -5  -1   47.28   83.17 
   7  -5  -1  155.90  134.71 
  -7   5   0   80.24  139.11 
  -7   5   0  104.96   79.33 
   7   5   0  180.15  144.90 
  -7   5   0  335.26  134.85 
   7  -5   0   75.24   88.58 
   7  -5   0  175.28  125.06 
  -7  -5   0 -277.92  362.48 
  -7  -5   0   99.49   79.00 
  -7   5  -1  475.95  105.22 
  -7   5  -1  665.54  153.45 
  -7   5  -1  454.50  132.04 
  -7  -5  -1  563.34  104.46 
   7  -5   1  526.63  151.90 
  -7  -5  -1  839.97  495.01 
  -7   5  -2  334.56  143.75 
  -7   5  -2  290.18  132.49 
  -7   5  -2  314.09  103.57 
  -7  -5  -2 -216.99  423.24 
   7  -5   2  316.80  102.12 
   7  -5   2  479.22  152.14 
  -7  -5  -2  381.37   92.11 
  -7   5  -3  641.20  120.57 
  -7   5  -3  197.94  143.39 
  -7   5  -3  286.68  103.11 
  -7   5  -3  335.94  130.86 
  -7  -5  -3   29.82  445.08 
   7  -5   3  251.68  133.65 
   7  -5   3  327.68  104.15 
  -7   5  -4  463.48  115.07 
  -7   5  -4  118.39  101.70 
  -7   5  -4  258.51  158.60 
  -7   5  -4  128.45  133.10 
  -7  -5  -4 -667.24  410.76 
   7  -5   4  257.14   94.41 
   7  -5   4  504.74  156.49 
  -7   5  -5  516.22  160.13 
  -7   5  -5  518.76  179.97 
  -7   5  -5  545.68  134.75 
  -7   5  -5  755.93  151.40 
   7  -5   5  400.48  106.86 
  -7  -5  -5  310.42  112.23 
  -7  -5  -5  -83.21  457.14 
   7  -5   5  307.51  137.40 
  -7   5  -6  114.96  114.03 
  -7   5  -6  226.69  150.09 
  -7   5  -6  640.01  212.51 
  -7   5  -6  759.30  162.71 
  -7  -5  -6  233.39  105.25 
   7  -5   6  182.10   85.92 
  -7   5  -7   75.37  122.85 
  -7   5  -7   17.36  168.46 
  -7   5  -7  327.26  145.41 
  -7   5  -7  120.69  147.27 
  -7  -5  -7  125.57   95.27 
   7  -6  -7 -186.49  139.50 
  -7  -6   7   31.73  107.20 
   7   6  -6  395.67  234.92 
   7  -6  -6  509.54  195.65 
  -7  -6   6  529.87  150.94 
  -7  -6   6 1569.87  508.78 
   7   6  -5   91.26  167.64 
  -7   6   5 -145.30   73.15 
  -7   6   5  169.65  126.49 
  -7  -6   5  541.41  434.31 
   7  -6  -5   76.10  155.02 
  -7  -6   5  176.11  118.60 
   7   6  -4  860.81  259.51 
  -7   6   4 1113.89  195.49 
  -7   6   4  753.03  133.37 
  -7  -6   4 1199.32  185.26 
  -7  -6   4 1796.87  569.46 
   7  -6  -4 1221.38  202.97 
   7  -6  -4  832.60  208.91 
   7   6  -3  197.12  171.73 
  -7   6   3  204.87  126.62 
  -7   6   3   83.54   90.68 
   7  -6  -3  185.51  104.08 
  -7  -6   3  231.92  109.97 
   7  -6  -3   61.95  154.62 
  -7  -6   3  376.05  470.31 
   7   6  -2  150.36  169.74 
  -7   6   2  435.80  146.99 
  -7   6   2  275.97   97.11 
   7  -6  -2  176.54  150.75 
  -7  -6   2  491.30  503.21 
   7  -6  -2  117.65   95.71 
  -7  -6   2  116.09   99.77 
  -7   6   1  536.24  120.53 
  -7   6   1  374.99  137.11 
   7   6  -1  875.72  231.02 
  -7  -6   1  287.10  475.74 
   7  -6  -1  844.87  192.76 
  -7  -6   1  494.22  118.61 
   7  -6  -1  651.86  140.03 
  -7   6   0 1736.81  224.07 
  -7   6   0 1960.53  196.83 
   7   6   0 1879.01  298.76 
  -7   6   0 2165.24  334.51 
  -7  -6   0 1924.27  192.35 
  -7  -6   0 2745.88  701.39 
   7  -6   0 1932.89  253.91 
  -7   6  -1  146.34  122.37 
  -7   6  -1 -312.50  168.45 
  -7   6  -1   64.24   94.22 
   7  -6   1  145.56   97.31 
  -7  -6  -1 -189.14  447.59 
  -7  -6  -1   49.37   84.68 
   7  -6   1  125.52  115.91 
  -7   6  -2  -75.59  107.40 
  -7   6  -2  -12.61   85.10 
  -7   6  -2   70.28  165.08 
  -7  -6  -2 -946.48  452.32 
   7  -6   2   40.98   79.36 
   7  -6   2   -5.61  108.62 
  -7   6  -3   12.17  124.27 
  -7   6  -3   37.65  104.87 
  -7   6  -3  -14.20  167.58 
   7  -6   3  -61.97   89.48 
  -7  -6  -3 -934.86  446.32 
   7  -6   3   23.95   80.89 
  -7   6  -4   66.76  132.35 
  -7   6  -4  -48.68  188.39 
  -7   6  -4  180.60  116.88 
   7  -6   4  112.27   86.58 
  -7  -6  -4 -473.07  443.57 
   7  -6   4  172.83  124.67 
  -7   6  -5   99.91  129.29 
  -7   6  -5 -125.13  180.56 
  -7   6  -5  127.22  112.44 
  -7  -6  -5 -760.64  421.47 
   7  -6   5   -6.01   74.96 
   7  -6   5  133.54  124.52 
  -7   6  -6  382.55  151.53 
  -7   6  -6  405.40  151.36 
  -7   6  -6   11.30  205.44 
   7  -6   6  -47.72   74.82 
   7   7  -5   91.96  166.99 
  -7  -7   5  716.34  492.03 
   7  -7  -5 -121.69  163.05 
  -7  -7   5  102.22  131.07 
   7   7  -4  186.88  166.37 
  -7   7   4  -89.52   89.87 
  -7   7   4  158.60  132.43 
  -7  -7   4   70.63  114.72 
  -7  -7   4  803.26  527.04 
   7  -7  -4   89.54  175.01 
  -7   7   3  239.11  108.31 
   7   7  -3  408.42  191.76 
  -7   7   3  486.37  158.17 
  -7  -7   3  472.40  151.73 
  -7  -7   3  375.48  581.16 
   7  -7  -3  179.19  176.64 
   7   7  -2   86.54  159.27 
  -7   7   2   29.26   82.93 
  -7   7   2   -4.27  118.61 
  -7  -7   2  162.89  546.79 
   7  -7  -2  -46.42  140.23 
  -7  -7   2   34.94   93.32 
   7   7  -1  473.43  191.38 
  -7   7   1  401.31  129.98 
  -7   7   1  418.56  153.17 
  -7  -7   1 1087.25  624.74 
   7  -7  -1  291.97  124.57 
   7  -7  -1  277.04  154.71 
  -7  -7   1  343.37  118.96 
   7   7   0   54.14  149.72 
  -7   7   0  -13.81   98.75 
  -7   7   0  102.32  128.41 
   7  -7   0   91.76  101.73 
  -7  -7   0 -523.26  504.17 
   7  -7   0  104.03  130.64 
  -7  -7   0   55.18   94.23 
  -7   7  -1  315.97  145.83 
  -7   7  -1   94.27   99.77 
  -7   7  -1  -78.24  196.71 
   7  -7   1   -2.38   83.79 
   7  -7   1  156.90  131.20 
  -7  -7  -1  243.79  154.73 
  -7  -7  -1 -108.56  530.64 
  -7   7  -2   45.45  115.71 
  -7   7  -2 -342.75  184.99 
  -7   7  -2  115.50  117.42 
   7  -7   2   18.04   83.70 
   7  -7   2   78.79  112.79 
  -7  -7  -2 -348.59  512.86 
  -7   7  -3  283.82  136.70 
  -7   7  -3  119.54  109.12 
  -7   7  -3 -225.04  203.16 
   7  -7   3  208.07  132.56 
   7  -7   3  247.04  100.30 
  -7  -7  -3 -528.65  496.36 
  -7   7  -4 1771.26  236.60 
  -7   7  -4 1352.71  220.06 
  -7   7  -4 1189.95  311.46 
   7  -7   4 1154.09  207.29 
   7  -7   4 1230.99  166.50 
  -7  -7  -4  136.35  532.77 
   7  -8  -2   58.43  124.64 
   7  -8  -2  116.73  154.23 
  -7   8   1   69.31  133.05 
   7   8  -1   13.90  138.90 
  -7  -8   1 -190.28  582.87 
   7  -8  -1   55.58  148.65 
   7  -8  -1  -92.14  106.38 
  -7  -8   1   13.99   96.92 
  -7   8   0  453.21  159.50 
  -7  -8   0  -74.40  572.65 
   7  -8   0  367.91  152.07 
  -7  -8   0    3.47   94.60 
   7  -8   0   94.70  118.69 
   7  -8   1  289.20  144.17 
   7  -8   1  380.81  125.58 
   8   0  -9 -162.39  158.48 
   8   0  -9  -73.42  112.89 
   8   0  -8  671.45  227.15 
   8   0  -8  866.68  225.87 
   8   0  -8  897.98  182.20 
  -8   0   8  868.33  112.70 
   8   0  -7  -14.51  102.50 
   8   0  -7   32.63  154.79 
  -8   0   7  -10.36   53.31 
   8   0  -7  247.29  154.79 
   8   0  -6   31.01  152.23 
   8   0  -6  196.96  134.90 
   8   0  -6   74.15   93.96 
  -8   0   6  117.93   61.54 
   8   0  -5   84.82  109.90 
   8   0  -5 -181.66  124.87 
   8   0  -5 -215.30   77.65 
  -8   0   5   -0.80   48.08 
   8   0  -4 1068.17  225.19 
  -8   0   4  964.97  233.16 
   8   0  -4  757.83  151.73 
  -8   0   4  833.93  123.34 
  -8   0   4  902.74  106.32 
   8   0  -4  809.39  167.94 
  -8   0   3  -39.74   46.34 
   8   0  -3  -28.91   87.84 
  -8   0   3   59.92   99.11 
   8   0  -3  -92.06   99.71 
  -8   0   3    4.00   77.87 
   8   0  -3  -75.00  114.99 
  -8   0   2 1472.85  125.94 
   8   0  -2 1686.68  225.84 
  -8   0   2 1638.26  263.20 
   8   0  -2 1809.38  214.97 
  -8   0   2 1541.10  142.29 
   8   0  -2 1934.52  222.64 
   8   0  -1 -112.61   95.29 
  -8   0   1   45.83   62.63 
  -8   0   1   10.48   88.10 
  -8   0   1   -7.72   46.69 
   8   0  -1 -125.73  108.31 
   8   0   0  634.93  150.68 
   8   0   0  685.39  134.33 
  -8   0   0 1011.79  106.03 
  -8   0   0  833.21  108.93 
  -8   0   0 1365.83  211.44 
   8   0   1  -43.94   99.58 
  -8   0  -1  -83.24   54.52 
  -8   0  -1   21.47   72.04 
  -8   0  -1   22.91   43.85 
   8   0   1  -80.04   62.95 
   8   0   2  155.34  126.52 
   8   0   2   41.26   59.53 
  -8   0  -2   89.99   50.10 
  -8   0  -2   10.21   63.72 
   8   0   3  131.64   65.00 
  -8   0  -3  101.96   64.16 
  -8   0  -3    2.90   63.19 
  -8   0  -3  -15.27   43.39 
  -8   0  -4   27.07   70.40 
  -8   0  -4  -27.84   61.28 
  -8   0  -4  -33.56   44.71 
  -8   0  -5   27.98   79.97 
  -8   0  -5   20.27   74.24 
  -8   0  -6   54.94   85.55 
  -8   0  -6   -5.62   68.09 
  -8   0  -7  -80.18   88.94 
  -8   0  -7 -149.17   69.58 
  -8   0  -8   29.75  119.77 
  -8   0  -8 -129.52   92.25 
   8   1  -9   19.67  119.03 
   8   1  -9   -2.91  191.52 
   8   1  -9  358.19  204.78 
  -8  -1   9   14.30   69.57 
   8  -1  -9   69.22  121.28 
   8  -1  -9 -228.17  161.36 
   8   1  -8  503.26  139.38 
   8   1  -8  663.63  253.00 
  -8   1   8  394.03   91.06 
   8   1  -8  345.45  217.61 
   8  -1  -8  117.10  176.86 
   8  -1  -8  427.61  137.03 
  -8  -1   8  397.84   91.73 
   8   1  -7 -128.68  159.71 
   8   1  -7  -40.13   78.19 
   8   1  -7   98.09  162.66 
  -8   1   7   29.09   60.76 
   8  -1  -7 -222.40  121.21 
   8  -1  -7 -145.00   88.37 
  -8  -1   7   18.52   56.82 
   8   1  -6  433.30  186.97 
   8   1  -6  292.52  123.54 
  -8   1   6  382.07   80.79 
   8   1  -6  401.78  203.78 
   8  -1  -6  278.79  169.06 
  -8  -1   6  346.11  203.18 
   8  -1  -6  113.35  111.43 
  -8  -1   6  373.75   80.89 
   8  -1  -6  412.88  140.66 
   8   1  -5  887.93  211.01 
   8   1  -5 1342.11  263.37 
  -8   1   5 1039.51  112.08 
   8   1  -5 1288.65  189.65 
   8  -1  -5 1086.51  217.96 
   8  -1  -5 1048.70  182.57 
  -8  -1   5 1497.18  308.10 
   8  -1  -5 1019.33  180.13 
  -8  -1   5 1083.69  118.46 
   8   1  -4   50.25  107.61 
   8   1  -4   41.66  151.69 
  -8   1   4   61.05   54.97 
  -8   1   4   97.68   99.52 
   8   1  -4  -72.75   86.39 
  -8  -1   4   91.33  127.58 
   8  -1  -4   73.29  110.33 
  -8  -1   4   83.91   55.65 
   8  -1  -4   93.89   93.90 
   8  -1  -4   69.30  133.99 
   8   1  -3   87.38  109.35 
   8   1  -3  -26.31   95.41 
  -8   1   3 -105.94   88.66 
  -8   1   3  103.79   50.35 
   8   1  -3   36.82  131.99 
  -8  -1   3  105.37   55.63 
   8  -1  -3   57.13   82.14 
   8  -1  -3  -10.31  109.07 
   8  -1  -3   86.70  114.68 
  -8  -1   3   62.30   72.20 
  -8  -1   3 -161.92   81.01 
  -8   1   2  144.46   90.66 
   8   1  -2  110.14  100.06 
   8   1  -2  -31.83  115.75 
  -8   1   2   66.80   41.30 
   8   1  -2 -134.38   98.95 
  -8   1   2  143.16   62.43 
   8  -1  -2  102.81  115.56 
  -8  -1   2   29.30   63.17 
  -8  -1   2  103.45  121.10 
   8  -1  -2  -10.87  118.51 
  -8  -1   2   43.30   51.20 
   8   1  -1  135.82  105.83 
  -8   1   1  434.12   78.84 
  -8   1   1  236.28   87.10 
   8   1  -1  368.97  147.44 
  -8   1   1  284.96   66.89 
   8  -1  -1  410.35  158.65 
   8  -1  -1  327.65  131.12 
  -8  -1   1  429.52  160.70 
  -8  -1   1  339.71   80.85 
  -8  -1   1  409.52   74.85 
   8   1   0  616.05  159.76 
  -8   1   0  528.74  101.78 
  -8   1   0  552.21   83.27 
   8   1   0  674.16  114.80 
  -8   1   0  489.88   85.35 
  -8  -1   0  738.82  182.09 
  -8  -1   0  516.47   91.35 
  -8  -1   0  563.46   79.13 
   8  -1   0  620.92  153.20 
   8  -1   0  424.85  147.88 
  -8   1  -1  -26.99   42.28 
  -8   1  -1   45.27   57.41 
   8   1   1  119.15  106.83 
  -8   1  -1   74.47   72.27 
  -8  -1  -1  -66.44   37.28 
  -8  -1  -1  204.01  111.56 
   8  -1   1  -20.61   90.07 
  -8  -1  -1  -13.77   47.84 
   8  -1   1  -81.44   83.00 
  -8   1  -2   -9.01   52.09 
  -8   1  -2  -28.84   58.48 
  -8   1  -2  -56.58   42.12 
   8   1   2  167.22  122.87 
  -8  -1  -2   66.45   50.21 
   8  -1   2   -1.73   98.94 
  -8  -1  -2  -30.09   51.10 
  -8  -1  -2  140.70   98.81 
   8  -1   2  117.94   79.62 
  -8   1  -3  272.97   83.75 
  -8   1  -3  202.38   82.70 
  -8   1  -3  134.17   67.72 
   8  -1   3  319.65   93.86 
  -8  -1  -3  260.64   65.29 
  -8  -1  -3  150.62   71.26 
  -8   1  -4  -33.72   69.55 
  -8   1  -4   87.57   63.11 
  -8   1  -4   80.55   76.72 
  -8  -1  -4  138.23   77.13 
   8  -1   4   -6.74   69.43 
  -8   1  -5  353.94  164.67 
  -8   1  -5   14.52   75.54 
  -8   1  -5   75.00   83.44 
  -8  -1  -5   74.56   68.55 
  -8  -1  -5  150.71   87.00 
  -8   1  -6  475.68  126.57 
  -8   1  -6  581.39  124.23 
  -8  -1  -6  601.60  122.28 
  -8  -1  -6  268.47  107.90 
  -8   1  -7    0.42   94.16 
  -8   1  -7  124.05   96.11 
  -8  -1  -7  235.82  102.68 
  -8  -1  -7  106.02  101.28 
  -8   1  -8  298.80  141.92 
  -8   1  -8  162.12  116.57 
  -8  -1  -8  198.69  113.83 
  -8  -1  -8  171.54  123.21 
   8   2  -9  976.86  303.42 
   8   2  -9 1112.29  201.68 
   8   2  -9 1125.02  330.82 
  -8  -2   9  850.84  130.32 
   8  -2  -9 1239.05  231.51 
   8  -2  -9  926.26  249.38 
   8   2  -8   22.04  103.36 
   8   2  -8 -161.34  182.85 
   8   2  -8  320.64  245.29 
  -8  -2   8  -25.37   67.69 
   8  -2  -8   79.18  166.48 
  -8  -2   8  190.98  263.77 
   8  -2  -8   97.39  121.15 
   8   2  -7  232.93  199.42 
   8   2  -7  298.52  132.50 
  -8   2   7  445.23   92.51 
   8   2  -7  616.58  236.79 
   8  -2  -7  549.21  162.40 
   8  -2  -7  587.94  196.53 
  -8  -2   7  382.12   87.74 
  -8  -2   7  931.78  310.80 
   8   2  -6   -1.85   91.42 
  -8   2   6    7.68   59.07 
   8   2  -6  345.99  202.71 
   8   2  -6  223.98  194.86 
   8  -2  -6  229.70  157.35 
  -8  -2   6   18.89  175.03 
  -8  -2   6  107.73   65.19 
   8  -2  -6  143.22  124.83 
   8   2  -5   94.88   94.53 
   8   2  -5  103.69  153.78 
   8   2  -5  -62.39  154.48 
  -8   2   5   75.40   59.16 
  -8  -2   5   85.07  168.80 
   8  -2  -5   67.53  134.61 
   8  -2  -5  -10.93  109.08 
  -8  -2   5   44.39   57.73 
  -8   2   4   78.48   97.69 
   8   2  -4  317.06  174.77 
   8   2  -4  123.64  137.02 
  -8   2   4   19.51   55.84 
   8  -2  -4   71.84  120.42 
  -8  -2   4   95.34   63.15 
  -8  -2   4  150.32  159.64 
   8  -2  -4   86.44  123.30 
  -8   2   3   85.49   63.55 
  -8   2   3   86.25  104.93 
   8   2  -3  -62.54  109.87 
   8   2  -3  178.19  156.65 
  -8  -2   3   74.21   61.18 
   8  -2  -3   80.82  113.00 
  -8  -2   3   -4.96   59.30 
  -8  -2   3  245.12  164.32 
   8  -2  -3   -8.70  114.05 
  -8   2   2 -115.11   90.56 
   8   2  -2  214.08  139.18 
   8   2  -2  -22.11  102.08 
  -8   2   2    4.45   51.84 
  -8  -2   2   50.05  135.83 
  -8  -2   2  -35.78   49.12 
  -8  -2   2   77.65   60.41 
   8  -2  -2  -26.20   97.30 
   8  -2  -2 -184.37  107.90 
  -8   2   1   63.83   87.31 
  -8   2   1   76.54   58.84 
   8   2  -1   99.19  124.14 
  -8   2   1  -36.03   49.27 
   8   2  -1  -25.08   88.34 
  -8  -2   1   73.70  136.81 
   8  -2  -1  -58.69   85.84 
   8  -2  -1  249.58  145.32 
  -8  -2   1   21.11   52.61 
  -8  -2   1   24.28   51.49 
  -8   2   0  141.04   63.18 
  -8   2   0   44.61   86.66 
   8   2   0   26.52  102.92 
  -8   2   0  -73.55   45.06 
  -8  -2   0   -5.44  132.17 
  -8  -2   0  -76.35   48.45 
   8  -2   0   35.77   90.88 
  -8  -2   0   46.26   51.59 
   8  -2   0  -95.60  113.50 
   8   2   1  308.83  135.86 
  -8   2  -1  328.67   88.74 
  -8   2  -1  212.03   69.81 
  -8   2  -1  153.82   91.33 
  -8  -2  -1  401.66   87.79 
  -8  -2  -1  182.63   63.45 
   8  -2   1  116.73  117.97 
  -8  -2  -1  466.41  231.53 
   8  -2   1  182.73  113.77 
  -8   2  -2   55.93   82.48 
  -8   2  -2  106.24   63.80 
   8   2   2   83.41  110.12 
  -8   2  -2   24.43   57.89 
   8  -2   2  117.09   96.15 
  -8  -2  -2  130.40   72.19 
   8  -2   2  -39.96   96.79 
  -8  -2  -2  527.66  239.16 
  -8  -2  -2   82.85   53.68 
  -8   2  -3 1680.48  176.71 
  -8   2  -3 1290.17  156.09 
  -8   2  -3 1337.78  135.96 
  -8  -2  -3 1625.34  117.80 
  -8  -2  -3 1472.22  156.91 
   8  -2   3 1336.32  184.30 
  -8   2  -4   -2.30   61.45 
  -8   2  -4   85.00   82.41 
  -8   2  -4  112.84   94.99 
   8  -2   4   43.24   84.41 
   8  -2   4   42.53   76.76 
  -8  -2  -4   55.01   66.31 
  -8   2  -5  151.35   93.08 
  -8   2  -5  -52.40   87.64 
  -8   2  -5  138.75   81.61 
  -8  -2  -5   80.62   81.73 
  -8   2  -6   26.53  100.56 
  -8   2  -6   17.01   97.09 
  -8  -2  -6   29.64   80.70 
  -8   2  -7  277.60  127.30 
  -8   2  -7  251.20  128.05 
  -8  -2  -7  269.35  107.12 
  -8  -2  -7  169.37  117.83 
  -8   2  -8   38.93  114.70 
  -8   2  -8  -82.80  104.03 
  -8  -2  -8   71.43  117.03 
  -8  -2  -8   40.37  101.80 
   8   3  -8  357.00  256.83 
   8   3  -8  222.08  213.38 
   8  -3  -8   64.68  119.18 
  -8  -3   8  320.98  299.41 
   8  -3  -8  259.82  175.39 
  -8  -3   8  147.30   81.28 
   8   3  -7   95.31  203.31 
   8   3  -7  -77.88  178.33 
  -8   3   7  199.65   84.03 
  -8  -3   7  541.34  309.04 
   8  -3  -7  180.93  166.19 
  -8  -3   7  212.58   93.75 
   8  -3  -7  240.46  146.82 
   8   3  -6  -86.67  160.51 
  -8   3   6  -81.02   55.05 
   8   3  -6  122.78  187.00 
  -8  -3   6   17.99   66.62 
   8  -3  -6  -75.25  125.87 
  -8  -3   6   57.32  220.48 
   8  -3  -6  -55.23  107.51 
  -8   3   5  908.22  156.12 
  -8   3   5  824.43  113.06 
   8   3  -5  960.56  243.57 
   8   3  -5  805.15  255.68 
  -8  -3   5  600.83  108.25 
   8  -3  -5  698.14  184.11 
  -8  -3   5 1043.20  326.75 
   8  -3  -5  998.99  200.51 
   8   3  -4  304.07  189.33 
  -8   3   4  570.36  101.12 
   8   3  -4  353.79  184.66 
  -8   3   4  458.36  123.39 
   8  -3  -4  312.33  150.83 
  -8  -3   4  561.18  251.70 
   8  -3  -4  171.55  133.31 
  -8  -3   4  422.18   95.68 
   8   3  -3  279.90  162.55 
   8   3  -3  165.55  159.37 
  -8   3   3  131.58   68.14 
  -8   3   3  350.90  125.30 
   8  -3  -3  192.01  125.64 
  -8  -3   3  434.00  233.06 
  -8  -3   3  254.21   76.19 
   8  -3  -3  176.99  124.44 
  -8  -3   3  141.48   69.23 
  -8   3   2  667.34  145.86 
  -8   3   2  635.78  101.63 
   8   3  -2  752.26  174.85 
   8   3  -2  266.42  152.61 
  -8  -3   2  692.59  106.07 
  -8  -3   2  991.59  298.14 
   8  -3  -2  773.16  160.14 
  -8  -3   2  570.14  100.68 
   8  -3  -2  702.07  182.44 
  -8   3   1  495.32  128.65 
   8   3  -1  432.86  146.19 
  -8   3   1  518.25  121.13 
   8   3  -1  312.67  147.08 
  -8   3   1  425.07   90.54 
  -8  -3   1  449.32   89.26 
   8  -3  -1  403.16  120.79 
  -8  -3   1  412.30   89.91 
   8  -3  -1  561.88  175.28 
  -8  -3   1  780.82  320.78 
  -8   3   0  178.54   73.36 
  -8   3   0  -64.39   90.28 
   8   3   0   56.52  102.35 
  -8   3   0  -14.25   73.01 
   8  -3   0  116.93   96.23 
  -8  -3   0   -4.87   56.46 
   8  -3   0  -54.23  121.83 
  -8  -3   0   38.13  254.57 
  -8  -3   0  -77.61   44.63 
  -8   3  -1   36.31   91.60 
  -8   3  -1  141.85   72.22 
   8   3   1  226.43  111.41 
  -8   3  -1   73.98   75.03 
   8  -3   1  373.68  146.15 
  -8  -3  -1  120.12   61.84 
  -8  -3  -1  231.27  327.12 
   8  -3   1  -18.98   86.79 
  -8  -3  -1   65.50   65.60 
  -8   3  -2  -14.23   79.22 
  -8   3  -2   31.99   86.27 
  -8   3  -2  -19.44   59.95 
  -8  -3  -2   -2.42   52.45 
  -8  -3  -2   47.14   67.52 
   8  -3   2  -11.65  101.75 
  -8  -3  -2 -107.97  313.04 
  -8   3  -3  314.05  107.27 
  -8   3  -3  104.93   76.13 
  -8   3  -3  150.43  109.65 
  -8  -3  -3  -88.71  351.61 
   8  -3   3  295.66  117.94 
  -8  -3  -3  147.13   77.57 
   8  -3   3  152.18   86.04 
  -8   3  -4   62.62   67.58 
  -8   3  -4   62.54   88.82 
  -8   3  -4   53.12   99.69 
   8  -3   4   48.66   78.27 
   8  -3   4   57.16   95.37 
  -8  -3  -4  -18.87   57.86 
  -8   3  -5  141.86   85.20 
  -8   3  -5  -24.57   91.29 
  -8   3  -5 -133.13   96.34 
   8  -3   5   50.44   75.25 
  -8  -3  -5    1.36   70.21 
  -8   3  -6  289.11  126.19 
  -8   3  -6  331.10  115.84 
  -8   3  -6   15.75  109.97 
  -8  -3  -6  327.26  112.86 
  -8   3  -7   14.65  122.23 
  -8   3  -7   -4.99  113.48 
  -8  -3  -7   -2.91   86.56 
   8   4  -8  424.93  246.98 
   8   4  -8  762.86  320.01 
   8  -4  -8  280.68  184.31 
  -8  -4   8  614.02  137.83 
  -8  -4   8  834.84  397.64 
   8  -4  -8  493.65  202.29 
   8   4  -7  394.27  216.14 
   8   4  -7  233.27  224.67 
  -8  -4   7  602.19  389.98 
   8  -4  -7  215.58  157.83 
  -8  -4   7  233.72  103.45 
   8  -4  -7  402.03  179.32 
   8   4  -6 -132.31  150.06 
   8   4  -6  -83.03  180.48 
  -8   4   6   92.46   73.51 
   8  -4  -6  151.78  150.34 
  -8  -4   6   42.49   79.40 
   8  -4  -6 -101.35  126.03 
  -8  -4   6  359.96  319.32 
   8   4  -5   90.41  173.89 
  -8   4   5  302.47  117.26 
  -8   4   5   83.56   76.19 
   8   4  -5   54.34  193.53 
   8  -4  -5 -187.59  110.37 
  -8  -4   5  -58.25   69.15 
  -8  -4   5   -8.98  234.12 
   8  -4  -5  157.38  140.94 
   8   4  -4  287.33  168.15 
  -8   4   4  241.43  127.04 
   8   4  -4  373.37  208.99 
  -8   4   4  290.62   86.30 
   8  -4  -4  214.45  131.07 
  -8  -4   4  395.30  283.95 
  -8  -4   4  323.23  102.21 
   8  -4  -4  222.34  145.36 
   8   4  -3  405.86  187.68 
   8   4  -3  906.09  200.73 
  -8   4   3  603.05  102.40 
  -8   4   3  675.21  149.22 
  -8  -4   3  826.40  112.29 
   8  -4  -3  667.86  159.97 
  -8  -4   3  768.37  126.18 
  -8  -4   3  797.42  340.78 
   8  -4  -3  473.30  173.23 
  -8   4   2  596.10  102.12 
  -8   4   2  756.88  152.19 
   8   4  -2  551.44  202.82 
   8   4  -2  631.72  165.34 
  -8  -4   2  922.31  413.50 
   8  -4  -2  680.08  184.35 
  -8  -4   2  723.24  121.75 
  -8  -4   2  628.00  104.93 
   8  -4  -2  861.44  168.45 
   8   4  -1  114.71  100.20 
  -8   4   1   35.80  107.20 
  -8   4   1    3.30   60.84 
   8   4  -1   85.52  127.46 
  -8  -4   1  -36.81  327.69 
  -8  -4   1  138.93   78.24 
   8  -4  -1  -74.93  128.74 
   8  -4  -1  162.95   97.96 
  -8  -4   1   78.52   67.92 
   8   4   0  719.64  143.44 
  -8   4   0  587.30  134.58 
  -8   4   0  592.23  108.73 
  -8   4   0  556.30  144.83 
   8  -4   0  453.24  155.41 
  -8  -4   0  511.64  106.08 
   8  -4   0  589.23  145.16 
  -8  -4   0  634.34  467.20 
  -8  -4   0  503.21  100.39 
  -8   4  -1  260.92  110.65 
  -8   4  -1  362.62   90.86 
  -8   4  -1  420.03  129.65 
   8   4   1  416.64  125.09 
  -8  -4  -1  325.23   83.06 
   8  -4   1  315.66  148.07 
  -8  -4  -1  362.46   95.32 
  -8  -4  -1  745.33  460.79 
   8  -4   1  276.32  119.58 
  -8   4  -2    8.77   68.20 
  -8   4  -2  -93.76   85.72 
  -8   4  -2   76.47  112.80 
  -8  -4  -2  124.22   72.04 
  -8  -4  -2 -605.58  388.75 
   8  -4   2   92.79  116.30 
  -8  -4  -2   93.54   73.77 
  -8   4  -3   30.81  101.08 
  -8   4  -3  -30.59   67.31 
  -8   4  -3    2.85  113.16 
   8  -4   3  126.61  113.32 
   8  -4   3   65.10   85.84 
  -8  -4  -3 -434.89  423.20 
  -8  -4  -3  143.34   74.35 
  -8   4  -4  197.07  134.66 
  -8   4  -4  -90.19   94.80 
  -8   4  -4  -79.21   72.14 
   8  -4   4   91.66  106.03 
  -8  -4  -4 -526.34  455.34 
  -8  -4  -4  -27.70   66.33 
   8  -4   4   -7.86   78.83 
  -8   4  -5 -150.41  108.10 
  -8   4  -5  -10.22  118.96 
  -8   4  -5  -16.42   88.02 
   8  -4   5  111.99  112.82 
   8  -4   5 -118.92   65.39 
  -8  -4  -5  131.16   79.76 
  -8   4  -6  -31.68  121.39 
  -8   4  -6   -4.19  102.26 
  -8   4  -6  -55.90  120.56 
  -8  -4  -6   23.60   96.97 
   8   5  -7  416.61  272.98 
   8   5  -7  213.48  189.39 
  -8  -5   7 1246.11  475.53 
   8  -5  -7  227.27  179.10 
  -8  -5   7  458.58  138.41 
   8  -5  -7  531.03  181.44 
   8   5  -6  483.45  207.72 
   8   5  -6  202.94  211.06 
  -8   5   6  258.04  114.68 
  -8  -5   6  175.23  117.91 
   8  -5  -6   89.29  157.83 
  -8  -5   6 1166.35  440.03 
   8   5  -5  673.10  207.29 
   8   5  -5  345.44  197.78 
  -8   5   5  330.02  138.50 
  -8   5   5  439.40  106.81 
   8  -5  -5  344.71  170.95 
   8  -5  -5  515.93  160.98 
  -8  -5   5  580.86  142.82 
  -8  -5   5  930.12  447.30 
  -8   5   4   70.78  100.14 
  -8   5   4   -9.63   72.27 
   8   5  -4   53.57  157.19 
   8  -5  -4   59.07  149.33 
   8  -5  -4  -27.47  100.74 
  -8  -5   4  187.19  355.03 
  -8  -5   4  -53.99   88.03 
  -8   5   3  169.70  115.56 
  -8   5   3   71.23   79.21 
   8   5  -3   18.41  169.19 
  -8  -5   3  219.65  411.27 
  -8  -5   3  149.29   96.11 
   8  -5  -3  156.57  147.96 
   8  -5  -3  198.90  107.17 
   8   5  -2  -86.66  132.45 
  -8   5   2  131.35  127.20 
  -8   5   2  -97.50   61.10 
  -8  -5   2  178.66  403.72 
   8  -5  -2   73.61  146.35 
  -8  -5   2   -5.42   68.37 
  -8  -5   2    4.13   77.51 
   8  -5  -2    7.31   93.00 
  -8   5   1 -146.81  114.06 
   8   5  -1  101.82  147.75 
  -8   5   1  -93.81   64.79 
   8  -5  -1  -54.02   83.03 
  -8  -5   1   72.60   69.93 
   8  -5  -1  -42.65  137.21 
  -8  -5   1  281.90  490.17 
  -8  -5   1   21.31   71.50 
  -8   5   0  450.79  154.95 
  -8   5   0  358.17  103.86 
   8  -5   0  451.71  132.95 
  -8  -5   0  340.55  102.34 
   8  -5   0  593.37  178.05 
  -8  -5   0  674.10  553.81 
  -8  -5   0  465.52  104.53 
  -8   5  -1  158.96  127.32 
  -8   5  -1   30.79   83.50 
  -8   5  -1  175.06  146.76 
  -8  -5  -1 -158.38  526.01 
  -8  -5  -1  177.45   84.01 
  -8  -5  -1   93.01   85.36 
   8  -5   1  114.57  128.70 
  -8   5  -2  -54.51  127.72 
  -8   5  -2  -51.92   71.46 
  -8   5  -2  172.86  126.54 
  -8  -5  -2 -243.39  512.23 
   8  -5   2   33.40  110.62 
  -8  -5  -2   19.65   73.46 
   8  -5   2   28.15   81.74 
  -8   5  -3   68.97  136.18 
  -8   5  -3  -28.20   80.22 
  -8   5  -3   96.44  122.13 
  -8  -5  -3   87.23   80.87 
   8  -5   3   13.54   75.07 
  -8  -5  -3 -889.57  493.50 
   8  -5   3  100.78  115.72 
  -8   5  -4  -14.55  142.71 
  -8   5  -4  -61.22  130.49 
  -8   5  -4  231.35  108.10 
   8  -5   4   40.65   81.31 
  -8  -5  -4   42.79   87.04 
   8  -5   4  152.28  120.75 
  -8   5  -5 1197.64  189.99 
  -8   5  -5  757.73  212.29 
  -8   5  -5  347.86  158.24 
  -8   5  -5 1324.29  183.18 
   8  -5   5  592.78  175.04 
  -8  -5  -5  615.84  136.58 
   8  -5   5  647.75  127.39 
  -8   5  -6  257.81  143.22 
  -8   5  -6  124.31  193.79 
  -8   5  -6  216.62  153.10 
  -8   5  -6  879.63  153.97 
  -8  -5  -6  434.96  122.54 
  -8   6   5  -18.30   92.11 
  -8   6   5  192.80  129.99 
   8   6  -5   46.07  171.69 
  -8  -6   5  725.02  443.51 
  -8  -6   5  200.14  120.53 
   8  -6  -5   86.63  163.74 
  -8   6   4   75.98   85.87 
   8   6  -4  203.43  202.09 
  -8   6   4  371.21  151.82 
   8  -6  -4  227.24  125.02 
  -8  -6   4   96.30  105.14 
  -8  -6   4  813.41  519.42 
   8  -6  -4  -44.67  158.48 
  -8   6   3   14.88   80.09 
   8   6  -3   57.92  159.95 
  -8   6   3  230.75  123.82 
  -8  -6   3  109.00  108.36 
  -8  -6   3  506.19  526.61 
   8  -6  -3 -158.92   75.85 
   8  -6  -3  -63.73  142.40 
  -8   6   2   45.27   84.24 
   8   6  -2   92.79  178.01 
  -8   6   2  187.07  134.02 
   8  -6  -2  167.91  105.29 
  -8  -6   2  -27.07  530.93 
  -8  -6   2  115.15   92.66 
  -8  -6   2  164.04   95.66 
   8  -6  -2 -116.04  139.92 
  -8   6   1   24.36   86.70 
  -8   6   1   78.74  121.81 
   8   6  -1  196.87  167.32 
  -8  -6   1  193.92  101.57 
   8  -6  -1  -17.88   93.65 
   8  -6  -1   20.12  136.28 
  -8  -6   1  -59.03  562.68 
  -8   6   0 -105.16   66.48 
  -8   6   0  145.11  122.20 
   8  -6   0  112.47  146.05 
  -8  -6   0  113.78   89.76 
  -8  -6   0   18.29  591.82 
  -8   6  -1  448.11  151.24 
  -8   6  -1  354.22  124.99 
  -8   6  -1  485.04  254.32 
   8  -6   1  403.58  156.95 
   8  -6   1  691.41  141.44 
  -8  -6  -1  168.24  602.11 
  -8  -6  -1  498.77  111.09 
  -8   6  -2  175.96  114.90 
  -8   6  -2  189.10  197.69 
  -8   6  -2  270.18  149.69 
   8  -6   2  148.09  106.03 
   8  -6   2  294.22  138.96 
  -8  -6  -2 -273.04  556.86 
  -8   6  -3  150.07  201.86 
  -8   6  -3  253.24  149.39 
  -8   6  -3  386.35  130.85 
   8  -6   3  590.91  168.09 
  -8  -6  -3  394.64  119.08 
   8  -6   3  366.29  113.25 
  -8   6  -4   -1.92  194.98 
  -8   6  -4  -14.19  105.04 
  -8   6  -4  367.65  150.77 
  -8  -6  -4  191.67  112.62 
   8  -6   4  267.03  136.81 
   8  -6   4  118.42   95.99 
  -8   7   3    5.76  103.32 
  -8   7   3  251.05  143.33 
   8   7  -3  158.51  189.22 
   8  -7  -3 -188.36  145.41 
  -8  -7   3  -58.12  107.82 
  -8  -7   3  282.16  597.59 
  -8   7   2  880.56  196.40 
  -8   7   2  638.99  148.48 
   8   7  -2 1086.34  275.79 
   8  -7  -2  937.34  213.51 
  -8  -7   2  846.59  167.40 
  -8  -7   2 1356.05  760.83 
   8   7  -1   80.85  156.94 
  -8   7   1   94.05  127.44 
  -8   7   1  -49.57   86.14 
   8  -7  -1  -51.23   89.36 
  -8  -7   1   19.55   98.97 
   8  -7  -1   60.48  140.69 
  -8  -7   1   45.15  614.97 
  -8   7   0   90.69  104.62 
  -8   7   0  218.18  134.74 
   8  -7   0  164.73  112.40 
  -8  -7   0 -536.35  596.24 
  -8  -7   0  200.95  107.72 
   8  -7   0  193.31  151.10 
  -8   7  -1  337.83  149.28 
  -8   7  -1   66.79  108.67 
   8  -7   1  164.16  129.49 
   8  -7   1  -58.61   96.41 
  -8  -7  -1 -828.48  546.32 
  -8   7  -2   89.08  131.98 
  -8   7  -2   -7.79  122.46 
  -8   7  -2  -77.41  227.36 
   8  -7   2  -23.61   85.73 
  -8  -7  -2-1000.00  567.62 
   8  -7   2  184.33  120.64 
  -9   0   8  336.16   98.15 
   9   0  -8  426.50  172.02 
   9   0  -8  363.21  214.30 
   9   0  -7  -95.79  119.74 
  -9   0   7  -66.97   57.31 
   9   0  -7  -23.03  169.34 
   9   0  -7   79.48  137.74 
   9   0  -6  311.11  152.00 
   9   0  -6  130.96  181.55 
   9   0  -6  193.45  143.20 
  -9   0   6  284.96   81.37 
   9   0  -5  -85.63  110.78 
   9   0  -5  -74.41  125.81 
   9   0  -5  -20.42  101.49 
  -9   0   5  -32.26   52.40 
  -9   0   4   90.63  170.13 
   9   0  -4  112.61  113.59 
  -9   0   4   62.10   61.81 
   9   0  -4  212.24  160.84 
   9   0  -4  158.53  144.48 
  -9   0   3  -72.14   54.28 
   9   0  -3 -265.00  102.93 
   9   0  -3  -93.54   79.45 
  -9   0   3   32.51   89.19 
   9   0  -3 -163.17  121.90 
  -9   0   3   73.84  137.56 
  -9   0   2  327.23   78.50 
  -9   0   2  177.39  146.12 
  -9   0   2  250.80   99.66 
   9   0  -2  264.04  145.30 
   9   0  -2  188.39  150.20 
  -9   0   1   94.40   59.37 
  -9   0   1   13.56  102.40 
   9   0  -1  -38.53  101.70 
   9   0  -1   31.89  127.65 
  -9   0   1   75.15   77.78 
  -9   0   0   48.78   67.34 
  -9   0   0  250.04   69.80 
   9   0   0  134.85   97.71 
   9   0   0  308.19  143.93 
  -9   0   0  215.56  117.09 
   9   0   1   70.26   72.79 
  -9   0  -1  -21.24   44.78 
  -9   0  -1  -96.81   56.32 
   9   0   1   75.26  116.63 
  -9   0  -2   54.47   57.42 
   9   0   2  -71.20  106.90 
  -9   0  -2   37.19   68.26 
  -9   0  -2  -65.09   65.90 
  -9   0  -3  -11.47   66.30 
  -9   0  -3  -27.82   70.08 
  -9   0  -3  142.46   64.76 
  -9   0  -4 3268.64  187.34 
  -9   0  -4 3435.20  223.43 
  -9   0  -4 3528.15  231.44 
  -9   0  -5   -0.40   76.06 
  -9   0  -5 -105.80   72.81 
  -9   0  -6   93.32   95.93 
  -9   0  -6  -76.29   74.32 
  -9   0  -7   51.27   93.42 
  -9   0  -7  -45.08  106.90 
   9   1  -8  -20.90  194.24 
   9   1  -8  -46.69  154.94 
  -9   1   8    4.11   73.23 
   9   1  -8    7.75  124.89 
   9  -1  -8 -291.06  147.65 
   9  -1  -8  -74.79  123.12 
  -9  -1   8  -68.26   60.91 
  -9   1   7  -27.98   64.64 
   9   1  -7   45.37  132.51 
   9   1  -7  148.31  166.03 
   9   1  -7 -196.52  179.24 
   9  -1  -7  -16.98  131.70 
   9  -1  -7  -16.75  175.26 
  -9  -1   7  -28.86   60.81 
   9   1  -6  -91.51  121.32 
  -9   1   6  -44.27   57.39 
   9   1  -6   16.53  171.94 
   9   1  -6  116.64  146.14 
  -9  -1   6  145.84  227.47 
   9  -1  -6  131.13  130.95 
   9  -1  -6  179.66  170.80 
  -9  -1   6   99.35   65.98 
   9   1  -5   39.30  124.29 
   9   1  -5   69.13  133.13 
  -9   1   5    7.21   54.44 
   9   1  -5   -3.62  160.73 
  -9  -1   5   15.00  169.84 
   9  -1  -5   93.80  106.05 
   9  -1  -5   13.25  136.37 
  -9  -1   5   13.76   58.13 
   9  -1  -5 -181.12   98.98 
   9   1  -4  631.68  209.77 
   9   1  -4  733.27  191.20 
  -9   1   4  537.54   93.35 
   9   1  -4  446.11  166.22 
  -9   1   4  492.65  135.77 
  -9  -1   4  522.44   94.57 
   9  -1  -4  671.87  188.62 
  -9  -1   4  755.43  242.90 
   9  -1  -4  514.25  138.09 
   9  -1  -4  633.07  176.58 
   9   1  -3   71.37  102.86 
  -9   1   3   36.87  110.00 
  -9   1   3   10.18   51.93 
   9   1  -3  -22.06  140.28 
   9  -1  -3  117.82  140.12 
  -9  -1   3  166.82  170.91 
   9  -1  -3   42.12  133.38 
  -9  -1   3  -40.23   50.05 
  -9  -1   3   -5.33   76.30 
   9   1  -2  366.77  138.12 
  -9   1   2  420.33  120.24 
  -9   1   2  361.44   79.45 
   9   1  -2  533.74  180.76 
   9  -1  -2  492.43  179.47 
  -9  -1   2  532.21  199.42 
  -9  -1   2  234.30   73.10 
   9  -1  -2  524.71  163.14 
  -9  -1   2  119.29   78.24 
  -9   1   1  432.79   83.29 
  -9   1   1  302.58  104.60 
  -9   1   1  283.15   70.04 
   9   1  -1  235.32  136.37 
  -9  -1   1  187.88   84.63 
  -9  -1   1  289.86   78.12 
   9  -1  -1  243.06  163.79 
   9  -1  -1  324.81  138.18 
  -9  -1   1  374.03  172.55 
   9   1   0  380.38  150.61 
  -9   1   0  595.70  118.15 
  -9   1   0  349.61   79.40 
  -9   1   0  457.24   85.94 
  -9  -1   0  796.43  189.53 
  -9  -1   0  324.90   90.06 
  -9  -1   0  411.88   86.57 
   9  -1   0  384.17  142.78 
   9  -1   0  508.13  151.84 
  -9   1  -1  784.98  125.54 
  -9   1  -1  645.91   94.62 
   9   1   1  965.99  204.44 
  -9   1  -1  710.82  111.61 
  -9  -1  -1  971.24  131.10 
  -9  -1  -1  789.94  103.77 
   9  -1   1  799.38  147.78 
  -9  -1  -1 1352.95  262.18 
   9  -1   1  445.26  157.96 
  -9   1  -2  -14.51   59.87 
  -9   1  -2  -38.42   73.99 
   9   1   2   -2.23  104.68 
  -9   1  -2   84.77   60.05 
   9  -1   2   51.62   70.49 
  -9  -1  -2  -81.90   43.40 
   9  -1   2   98.67  115.00 
  -9  -1  -2   55.30   67.85 
  -9   1  -3   69.23   71.09 
  -9   1  -3   50.85   73.88 
  -9   1  -3   31.10   77.44 
  -9  -1  -3   95.13   63.92 
   9  -1   3  186.94   83.81 
  -9  -1  -3   58.01   72.84 
  -9   1  -4  333.73   94.05 
  -9   1  -4  152.86   83.39 
  -9   1  -4   50.43   92.71 
   9  -1   4  279.97  119.37 
  -9  -1  -4  115.75   89.34 
  -9   1  -5  349.47  115.61 
  -9   1  -5  228.73  107.64 
  -9  -1  -5  289.17  109.56 
  -9  -1  -5  288.85  118.60 
  -9   1  -6  -43.62   84.80 
  -9   1  -6  -92.90   87.92 
  -9  -1  -6  -95.21   74.82 
  -9  -1  -6  106.57   98.87 
  -9   1  -7  647.64  152.81 
  -9   1  -7  637.43  166.99 
  -9  -1  -7 1052.82  199.33 
  -9  -1  -7 1049.10  177.48 
   9   2  -8   84.57  233.11 
   9   2  -8   87.94  181.89 
   9  -2  -8 -195.01  124.62 
   9  -2  -8  -25.06  169.92 
  -9  -2   8  177.28   86.33 
  -9   2   7  429.74  102.21 
   9   2  -7  590.38  240.88 
   9   2  -7  466.93  243.81 
   9  -2  -7  464.30  181.97 
  -9  -2   7  821.02  348.23 
  -9  -2   7  742.84  126.93 
   9  -2  -7  581.01  212.81 
  -9   2   6   87.81   71.25 
   9   2  -6  116.42  185.01 
   9   2  -6  -14.42  196.72 
  -9  -2   6  138.58  222.54 
   9  -2  -6  184.48  162.43 
  -9  -2   6   58.13   72.09 
   9  -2  -6   -6.57  129.26 
   9   2  -5 -117.72  161.67 
   9   2  -5   76.62  154.19 
  -9   2   5   -1.48   59.16 
  -9  -2   5   -6.86   59.30 
   9  -2  -5   61.12  125.16 
   9  -2  -5  111.05  153.81 
  -9  -2   5  -17.47  187.60 
  -9   2   4  155.00  117.46 
  -9   2   4   54.25   64.12 
   9   2  -4  161.12  150.62 
   9   2  -4   93.76  172.05 
   9  -2  -4  123.39  138.06 
  -9  -2   4  294.02  221.99 
   9  -2  -4   21.42  134.17 
  -9  -2   4    8.12   56.27 
  -9   2   3  497.03  141.58 
  -9   2   3  555.15  102.12 
   9   2  -3  513.66  196.14 
   9   2  -3  561.60  190.67 
  -9  -2   3  511.09  108.76 
  -9  -2   3  675.93  105.27 
   9  -2  -3  682.68  172.86 
   9  -2  -3  921.13  202.49 
  -9  -2   3  998.13  289.04 
  -9   2   2  168.24   77.55 
   9   2  -2  141.44  120.93 
  -9   2   2   -7.26  107.61 
   9   2  -2   49.31  148.46 
  -9  -2   2   81.13   67.74 
   9  -2  -2   21.16  150.68 
  -9  -2   2  -10.52   62.75 
   9  -2  -2   22.24  116.63 
  -9  -2   2  221.30  182.13 
  -9   2   1  341.08  118.95 
  -9   2   1  148.34   74.19 
   9   2  -1  368.05  158.18 
  -9  -2   1  212.27   79.75 
  -9  -2   1  372.24  196.13 
  -9  -2   1   83.42   62.91 
   9  -2  -1   82.28  108.86 
   9  -2  -1  170.74  154.49 
   9   2   0   34.45  112.93 
  -9   2   0   19.79   59.05 
  -9   2   0   27.04   94.72 
  -9   2   0   25.26   59.62 
  -9  -2   0   20.37   61.42 
   9  -2   0   10.08  122.27 
  -9  -2   0  150.88  153.08 
   9  -2   0  -53.58   92.62 
  -9  -2   0  -36.17   48.19 
  -9   2  -1  990.21  150.85 
   9   2   1 1625.33  239.74 
  -9   2  -1 1456.72  158.68 
  -9   2  -1 1282.17  133.43 
   9  -2   1 1266.19  202.62 
  -9  -2  -1 2152.90  347.39 
  -9  -2  -1 1362.53  151.09 
  -9  -2  -1 1497.16  135.78 
   9  -2   1 1508.44  216.67 
   9   2   2  183.42  129.35 
  -9   2  -2  191.84  104.65 
  -9   2  -2  115.15   70.45 
  -9   2  -2   95.61   82.02 
   9  -2   2   85.69   96.89 
   9  -2   2  160.85  125.14 
  -9  -2  -2   60.87   59.97 
  -9  -2  -2   90.45   61.50 
  -9   2  -3  -28.25   80.98 
  -9   2  -3  -29.85   71.77 
  -9   2  -3    1.60   65.58 
   9  -2   3   49.57   78.34 
  -9  -2  -3   -3.07   61.08 
  -9  -2  -3  -47.89   54.42 
  -9   2  -4   40.04   99.93 
  -9   2  -4    1.21   68.84 
  -9   2  -4  -33.20   78.54 
   9  -2   4   36.62   81.68 
  -9  -2  -4   18.96   71.69 
   9  -2   4   26.27   83.12 
  -9   2  -5   50.39   88.01 
  -9   2  -5 -168.40   88.15 
  -9   2  -5 -149.37   67.26 
  -9  -2  -5  -38.63   71.44 
  -9   2  -6  -84.89  105.28 
  -9   2  -6   95.91  115.22 
  -9  -2  -6  -46.52   80.49 
  -9  -2  -6  242.48  117.50 
  -9   2  -7   41.58  113.42 
  -9  -2  -7   73.25  123.01 
   9   3  -7   53.07  195.83 
   9   3  -7 -160.13  178.99 
  -9   3   7  -47.25   81.42 
  -9  -3   7  177.68  291.46 
   9  -3  -7  -33.31  152.10 
   9  -3  -7 -118.12  134.48 
  -9  -3   7   56.12   83.55 
   9   3  -6  147.74  187.10 
   9   3  -6 -153.16  185.54 
  -9   3   6  -53.15   64.02 
  -9  -3   6    6.11   73.73 
   9  -3  -6   85.61  158.85 
  -9  -3   6  315.55  308.59 
   9  -3  -6  158.64  165.07 
   9   3  -5   67.93  194.51 
  -9   3   5  127.31   74.74 
   9   3  -5   84.45  169.49 
   9  -3  -5  184.46  149.04 
  -9  -3   5  230.33   89.56 
  -9  -3   5  273.86  273.08 
   9  -3  -5   35.19  147.06 
   9   3  -4  191.21  175.02 
  -9   3   4  194.43   86.98 
  -9   3   4  226.76  130.58 
   9   3  -4  189.40  183.75 
  -9  -3   4  456.15  283.13 
   9  -3  -4  275.15  154.57 
   9  -3  -4  424.88  155.68 
  -9  -3   4  299.89   95.54 
   9   3  -3  315.40  169.57 
   9   3  -3  -11.95  129.30 
  -9   3   3   86.35   69.25 
  -9   3   3   62.75  130.26 
   9  -3  -3  188.38  132.80 
  -9  -3   3  178.07  229.55 
  -9  -3   3  -17.22   62.02 
   9  -3  -3 -121.90  135.07 
   9   3  -2  399.72  169.80 
  -9   3   2  457.69  143.79 
  -9   3   2  313.00   88.42 
   9   3  -2  440.42  179.66 
   9  -3  -2  304.44  166.95 
  -9  -3   2  426.04   96.20 
  -9  -3   2  672.31  302.37 
  -9  -3   2  252.82   84.15 
   9  -3  -2  340.00  134.63 
   9   3  -1   65.99  118.12 
  -9   3   1  -36.98   65.03 
   9   3  -1  -60.75  119.86 
  -9   3   1  -28.65  110.77 
   9  -3  -1  104.09  161.23 
  -9  -3   1  251.03  228.67 
  -9  -3   1  -42.73   61.67 
  -9  -3   1  -12.26   60.47 
   9  -3  -1   98.43  104.06 
  -9   3   0  -13.61   66.39 
  -9   3   0   19.37  105.63 
  -9   3   0   60.55   79.94 
   9   3   0 -102.19   89.39 
  -9  -3   0   52.13   71.67 
  -9  -3   0  542.61  296.10 
  -9  -3   0  126.57   65.27 
   9  -3   0   67.62  104.36 
   9  -3   0   57.80  139.05 
  -9   3  -1  694.12  118.86 
  -9   3  -1  760.46  135.43 
   9   3   1  884.98  181.05 
  -9   3  -1  781.11  153.32 
   9  -3   1 1108.75  208.05 
  -9  -3  -1  655.71  102.75 
  -9  -3  -1  686.93  117.38 
  -9  -3  -1 1556.79  405.65 
   9  -3   1  604.91  167.20 
  -9   3  -2  258.32   90.96 
  -9   3  -2  248.32  105.54 
  -9   3  -2  412.87  124.37 
   9  -3   2  245.46  132.03 
  -9  -3  -2  562.22  365.46 
  -9  -3  -2  360.90   87.06 
  -9  -3  -2  297.63   96.15 
  -9   3  -3   -7.80   98.75 
  -9   3  -3   79.35  111.46 
  -9   3  -3 -123.42   61.33 
   9  -3   3  172.48  102.13 
   9  -3   3   47.61   83.72 
  -9  -3  -3   65.31   71.74 
  -9   3  -4  192.62   90.93 
  -9   3  -4  -71.04  106.64 
  -9   3  -4   60.06  100.68 
   9  -3   4   13.70   91.09 
  -9  -3  -4   40.47   78.96 
   9  -3   4  208.31  104.25 
  -9   3  -5   43.08  109.65 
  -9   3  -5  350.92  139.04 
  -9   3  -5  217.75  104.60 
  -9  -3  -5  108.62   87.86 
  -9   3  -6  356.27  150.73 
  -9   3  -6  707.04  165.02 
  -9  -3  -6  573.94  146.86 
   9   4  -7  -87.81  199.88 
   9   4  -7  433.90  259.47 
   9  -4  -7   45.86  157.70 
  -9  -4   7  -50.72   85.94 
   9  -4  -7 -135.64  151.65 
  -9  -4   7  496.52  412.29 
  -9   4   6  236.36   90.87 
   9   4  -6  433.89  241.89 
   9   4  -6  477.58  220.55 
  -9  -4   6  216.49  101.70 
   9  -4  -6  836.14  207.79 
  -9  -4   6  658.41  408.52 
   9  -4  -6  355.28  190.67 
   9   4  -5  121.72  191.04 
  -9   4   5  -28.61   70.58 
   9   4  -5   11.48  179.06 
   9  -4  -5 -199.66  130.96 
  -9  -4   5  680.90  358.08 
  -9  -4   5  -23.82   86.00 
   9  -4  -5  -65.32  128.47 
  -9   4   4  258.90  117.80 
  -9   4   4   80.83   79.17 
   9   4  -4   70.46  161.66 
   9   4  -4  222.40  197.94 
  -9  -4   4  252.29  100.65 
  -9  -4   4  289.70  317.35 
   9  -4  -4   -3.42  148.33 
   9  -4  -4  129.87  121.27 
  -9   4   3  -13.57   69.44 
   9   4  -3    2.06  157.50 
   9   4  -3   60.42  139.43 
  -9   4   3  102.70  118.71 
   9  -4  -3  166.56  121.05 
  -9  -4   3   14.99   76.37 
   9  -4  -3 -126.11  131.19 
  -9  -4   3  138.52  332.34 
  -9   4   2    1.39   66.73 
   9   4  -2  180.08  138.89 
   9   4  -2  -17.72  143.53 
  -9   4   2   83.14  137.82 
   9  -4  -2  228.36  111.21 
  -9  -4   2  479.09  335.90 
  -9  -4   2   -4.84   74.32 
   9  -4  -2   55.19  147.76 
  -9  -4   2   -0.53   72.20 
  -9   4   1  205.12   87.16 
  -9   4   1  179.10  136.97 
   9   4  -1  270.00  124.81 
   9   4  -1   74.49  140.96 
  -9  -4   1  861.99  435.80 
  -9  -4   1  285.14  101.19 
   9  -4  -1  133.37  164.65 
  -9  -4   1  128.92   81.78 
   9  -4  -1   47.92   96.94 
   9   4   0  119.74   96.18 
  -9   4   0   15.43   77.46 
  -9   4   0  105.58  129.42 
   9  -4   0  126.16   97.12 
   9  -4   0 -100.92  127.73 
  -9  -4   0  238.69  416.30 
  -9  -4   0   57.69   69.89 
  -9  -4   0  -21.19   65.87 
   9   4   1   58.83  106.18 
  -9   4  -1   88.51   78.58 
  -9   4  -1   -9.21  102.06 
  -9   4  -1  253.00  135.98 
   9  -4   1  -26.70  100.45 
   9  -4   1  229.77  144.34 
  -9  -4  -1   28.64   60.73 
  -9  -4  -1  -34.81   63.03 
  -9  -4  -1    9.66  437.57 
  -9   4  -2   93.44  125.65 
  -9   4  -2    4.26  105.28 
  -9   4  -2   63.90   69.07 
  -9  -4  -2   80.66  483.82 
  -9  -4  -2   19.51   72.76 
   9  -4   2  119.87  117.00 
  -9   4  -3  626.66  161.01 
  -9   4  -3  416.00  150.50 
  -9   4  -3  511.03  119.49 
   9  -4   3  843.76  186.76 
  -9  -4  -3  503.60  125.96 
   9  -4   3  885.18  144.57 
  -9  -4  -3  946.12  811.91 
  -9   4  -4 1480.76  211.35 
  -9   4  -4 1648.13  192.29 
  -9   4  -4 1584.59  228.36 
   9  -4   4 1194.29  166.70 
  -9  -4  -4 1206.35  174.26 
   9  -4   4 1829.17  261.39 
  -9   4  -5  291.32  165.46 
  -9   4  -5  372.49  158.55 
  -9   4  -5  451.05  139.11 
   9  -4   5  373.36  150.86 
   9  -4   5  331.81  116.29 
  -9  -4  -5  445.61  128.05 
  -9   5   5  140.46   98.52 
   9   5  -5  215.30  207.61 
   9  -5  -5   19.25  169.51 
  -9  -5   5  194.40  115.56 
   9  -5  -5  215.89  135.94 
  -9  -5   5  519.08  413.64 
   9   5  -4  188.50  197.70 
  -9   5   4  114.08   90.87 
  -9   5   4  411.62  137.63 
  -9  -5   4  946.86  468.63 
   9  -5  -4  262.95  143.49 
   9  -5  -4  209.63  188.84 
  -9  -5   4  227.39  111.06 
  -9   5   3  252.40  130.47 
  -9   5   3  101.24   90.93 
   9   5  -3  150.43  173.54 
  -9  -5   3   27.17   86.88 
   9  -5  -3  203.81  113.48 
  -9  -5   3  473.82  455.32 
   9  -5  -3  229.19  170.94 
   9   5  -2  131.90  188.94 
  -9   5   2  -27.34   68.96 
  -9   5   2  150.37  131.48 
   9  -5  -2   51.44   99.37 
  -9  -5   2  103.97   91.97 
  -9  -5   2  382.85  478.23 
   9  -5  -2  -99.64  145.84 
  -9  -5   2  -69.63   76.56 
  -9   5   1  761.93  129.28 
  -9   5   1  999.81  192.89 
   9   5  -1  796.45  241.41 
  -9  -5   1  923.91  145.29 
   9  -5  -1  865.16  174.49 
  -9  -5   1 1098.56  161.42 
  -9  -5   1 1317.59  580.58 
   9  -5  -1  926.48  208.24 
  -9   5   0  160.13  132.69 
  -9   5   0  181.53   95.97 
  -9  -5   0  268.68   92.27 
   9  -5   0  149.94  107.96 
  -9  -5   0  539.30  592.16 
  -9  -5   0  401.14  116.86 
   9  -5   0  140.33  140.88 
  -9   5  -1   51.70   83.48 
  -9   5  -1  -39.03  123.75 
  -9  -5  -1  143.13   84.35 
  -9  -5  -1  136.55   92.81 
  -9  -5  -1  210.07  591.07 
   9  -5   1  153.30  137.11 
  -9   5  -2  287.80  113.74 
  -9   5  -2  157.51  139.70 
  -9   5  -2   25.21  154.84 
  -9  -5  -2 -103.27  562.31 
   9  -5   2  174.46  129.93 
  -9  -5  -2  177.95   97.76 
   9  -5   2  271.19  116.01 
  -9   5  -3  -18.00  154.45 
  -9   5  -3   35.27  140.04 
  -9   5  -3    1.05   85.18 
   9  -5   3  216.37  138.66 
   9  -5   3  128.17   98.83 
  -9  -5  -3   71.24   93.06 
  -9  -5  -3 -474.04  555.55 
  -9   5  -4  271.92  121.89 
  -9   5  -4  274.66  160.92 
  -9   5  -4  154.10  178.81 
  -9  -5  -4  204.48  108.70 
   9  -5   4  229.19  100.66 
   9  -5   4  253.05  141.54 
  -9   6   4  311.80  121.18 
  -9   6   4  436.89  160.12 
   9   6  -4  518.14  261.38 
  -9  -6   4   84.47  116.93 
   9  -6  -4  173.26  191.66 
  -9  -6   4 1040.02  527.98 
   9  -6  -4  341.83  140.35 
   9   6  -3  -12.95  167.03 
  -9   6   3  110.51  127.09 
  -9   6   3   17.20   96.58 
   9  -6  -3  306.50  125.61 
   9  -6  -3   20.94  166.88 
  -9  -6   3  927.42  567.37 
  -9  -6   3   76.03   99.08 
   9   6  -2  336.92  209.57 
  -9   6   2  812.51  171.31 
  -9   6   2  186.41  105.66 
   9  -6  -2  -92.83  155.96 
  -9  -6   2 1076.63  629.71 
   9  -6  -2  399.90  144.06 
  -9  -6   2  289.33  118.09 
   9   6  -1  -80.07  137.02 
  -9   6   1  -76.39   82.48 
  -9   6   1  150.29  135.48 
  -9  -6   1   33.40   94.31 
   9  -6  -1  235.00  116.82 
   9  -6  -1  -19.10  122.96 
  -9  -6   1  -27.82   86.21 
  -9  -6   1  147.28  598.41 
  -9   6   0   41.89   89.55 
  -9   6   0   68.69  123.79 
  -9  -6   0   64.61   92.06 
   9  -6   0  -35.27  134.43 
  -9  -6   0   95.86   86.81 
  -9  -6   0  428.92  673.76 
  -9   6  -1  375.79  129.99 
  -9   6  -1  175.97  150.03 
   9  -6   1  565.92  171.29 
  -9  -6  -1  802.49  695.59 
  -9  -6  -1  458.82  131.71 
   9  -6   1  313.71  120.51 
  -9   6  -2  383.66  143.33 
  -9   6  -2  230.78  160.15 
   9  -6   2  196.60  114.76 
  -9  -6  -2 -300.91  639.93 
   9  -6   2  290.80  140.27 
  -9  -6  -2  396.56  122.47 
  10   0  -7 -190.94  136.17 
 -10   0   7  -63.37   64.89 
  10   0  -7   42.72  204.28 
  10   0  -6 1383.11  240.38 
  10   0  -6 1609.17  276.21 
  10   0  -6 1336.24  291.97 
 -10   0   6 1542.70  154.43 
  10   0  -5 -205.04  139.65 
  10   0  -5  -43.41  109.13 
 -10   0   5   89.90   69.15 
  10   0  -5  -13.17  167.15 
 -10   0   4  -77.77   53.00 
  10   0  -4  281.42  179.09 
  10   0  -4  115.90  117.14 
  10   0  -4 -282.72  143.07 
 -10   0   3  -69.25  108.25 
 -10   0   3  -48.43  166.21 
 -10   0   3  -60.28   63.33 
  10   0  -3  166.49  156.09 
 -10   0   2 2201.97  165.51 
  10   0  -2 1839.28  276.03 
 -10   0   2 1917.31  193.51 
 -10   0   2 2436.77  370.15 
  10   0  -1   50.50  121.23 
 -10   0   1  -24.67   58.88 
 -10   0   1  -13.88   85.72 
 -10   0   1   47.28  130.39 
 -10   0   0 1486.92  156.50 
  10   0   0  855.56  202.02 
 -10   0   0 1090.47  148.84 
 -10   0   0 1026.55  125.91 
 -10   0  -1  -43.68   53.29 
  10   0   1   33.07  122.69 
 -10   0  -1   22.93   58.28 
 -10   0  -1  -20.92   76.00 
 -10   0  -2  517.69   92.51 
 -10   0  -2  422.26  112.97 
 -10   0  -2  618.77  127.98 
  10   0   2  399.12  180.00 
 -10   0  -3 -145.28   71.11 
 -10   0  -3    4.07   77.13 
 -10   0  -3  -18.44   60.39 
 -10   0  -4   60.60   77.66 
 -10   0  -4  -50.23   84.37 
 -10   0  -5    2.23   85.37 
 -10   0  -5 -135.84   86.18 
 -10   0  -6   72.15  111.51 
 -10   0  -6   24.77   99.37 
 -10   1   7  227.85   97.45 
  10   1  -7  325.12  192.13 
  10   1  -7  285.32  243.44 
 -10  -1   7   87.64   85.33 
  10  -1  -7  121.47  176.72 
  10  -1  -7  205.48  204.96 
  10   1  -6  108.87  157.91 
  10   1  -6 -192.45  165.91 
 -10   1   6   61.98   71.25 
 -10  -1   6   33.42   68.17 
  10  -1  -6 -157.99  149.63 
  10  -1  -6 -149.12  153.01 
 -10   1   5  174.65   79.90 
  10   1  -5  250.64  195.19 
  10   1  -5  109.18  147.30 
 -10  -1   5   58.46   70.96 
 -10  -1   5  397.77  267.99 
  10  -1  -5  -30.92  158.70 
  10  -1  -5   59.66  151.33 
  10   1  -4  259.73  150.93 
  10   1  -4  405.38  200.18 
 -10   1   4  185.03   78.80 
  10  -1  -4  162.66  149.69 
  10  -1  -4  203.60  171.20 
 -10  -1   4   60.83   69.19 
 -10  -1   4  363.99  230.44 
 -10   1   3 1299.06  188.99 
  10   1  -3 1131.69  217.09 
 -10   1   3 1574.24  154.18 
  10   1  -3  915.08  235.83 
 -10  -1   3 1568.31  334.09 
  10  -1  -3 1275.76  247.58 
 -10  -1   3 1118.55  135.63 
  10  -1  -3 1304.86  245.83 
 -10  -1   3 1179.75  172.34 
 -10   1   2   12.10   59.45 
 -10   1   2  146.49  118.04 
  10   1  -2   21.65  139.84 
 -10  -1   2    6.86   61.87 
 -10  -1   2  101.32  165.94 
  10  -1  -2 -140.61  154.75 
  10  -1  -2   49.84  120.02 
 -10  -1   2   -6.61   91.54 
  10   1  -1   65.49  135.56 
 -10   1   1   89.68   68.51 
 -10   1   1   24.52  107.49 
  10  -1  -1  198.42  126.10 
 -10  -1   1  272.27   85.39 
  10  -1  -1  138.07  140.78 
 -10  -1   1   25.56   80.58 
 -10  -1   1  608.14  221.03 
 -10   1   0  556.34  128.35 
 -10   1   0  438.30   93.54 
  10   1   0  282.37  160.12 
 -10   1   0  302.93   88.61 
 -10  -1   0  333.02   85.07 
 -10  -1   0  388.02  106.04 
  10  -1   0  202.39  133.73 
  10  -1   0  499.14  159.92 
 -10   1  -1  399.42   90.88 
 -10   1  -1  687.86  116.86 
  10   1   1  597.64  188.61 
 -10   1  -1  515.99  125.85 
 -10  -1  -1  289.40   81.99 
  10  -1   1  666.08  136.32 
 -10  -1  -1  733.03  132.94 
  10  -1   1  497.79  168.15 
 -10   1  -2  973.88  131.40 
  10   1   2  765.98  202.11 
 -10   1  -2  921.04  143.58 
 -10   1  -2  895.20  153.19 
 -10  -1  -2 1238.64  145.18 
 -10  -1  -2  805.74  142.78 
  10  -1   2  803.81  213.76 
 -10   1  -3  -38.83   65.83 
 -10   1  -3   32.02   88.25 
 -10   1  -3 -113.49   73.54 
 -10  -1  -3  -25.81   81.85 
 -10  -1  -3   15.95   68.49 
 -10   1  -4  643.47  151.48 
 -10   1  -4  711.31  127.67 
 -10   1  -4  520.31  136.64 
 -10  -1  -4  670.93  149.54 
 -10  -1  -4  521.69  133.09 
 -10   1  -5   76.94  109.18 
 -10   1  -5  -38.62  101.58 
 -10  -1  -5   -0.19   92.86 
 -10  -1  -5   70.70  109.70 
  10   2  -7  360.06  233.36 
 -10   2   7  481.85  113.55 
  10   2  -7  522.56  287.14 
 -10  -2   7  931.61  393.39 
  10  -2  -7  273.24  192.94 
  10  -2  -7  502.10  212.96 
 -10  -2   7  445.83  110.99 
 -10   2   6   31.04   72.41 
  10   2  -6   13.89  195.82 
  10   2  -6  205.42  198.29 
  10  -2  -6  259.17  176.53 
 -10  -2   6  -21.35  261.32 
 -10  -2   6  -97.08   68.07 
  10  -2  -6  144.73  179.05 
  10   2  -5  266.98  181.53 
 -10   2   5  449.41   99.92 
  10   2  -5  611.11  251.90 
 -10  -2   5  524.56  109.79 
 -10  -2   5  558.06  303.10 
  10  -2  -5  411.97  201.36 
  10  -2  -5  636.09  211.45 
  10   2  -4  163.87  173.52 
 -10   2   4  -41.18   60.86 
  10   2  -4  171.35  166.20 
  10  -2  -4  -94.71  118.68 
 -10  -2   4   12.03  239.95 
 -10  -2   4   78.79   74.72 
  10  -2  -4 -185.73  145.54 
  10   2  -3  268.71  149.98 
  10   2  -3  465.97  204.21 
 -10   2   3  252.44   85.10 
 -10   2   3  -46.79  136.40 
 -10  -2   3  141.37   75.19 
  10  -2  -3  222.98  143.72 
 -10  -2   3  286.33  227.86 
  10  -2  -3  -28.50  167.52 
 -10   2   2 -153.17  117.83 
 -10   2   2  -75.02   56.58 
  10   2  -2    8.08  146.62 
 -10  -2   2  520.40  238.11 
 -10  -2   2  -76.59   56.52 
 -10  -2   2  -48.78   81.06 
  10  -2  -2 -208.52  140.87 
  10  -2  -2 -103.07  108.68 
  10   2  -1  282.62  168.24 
 -10   2   1  163.44   80.93 
 -10   2   1  318.70  134.57 
 -10  -2   1  545.16  236.23 
 -10  -2   1  162.03   89.90 
 -10  -2   1  129.52   69.98 
  10  -2  -1  256.51  169.14 
  10  -2  -1  145.83  125.25 
  10   2   0  -32.07  119.85 
 -10   2   0   66.34  108.41 
 -10   2   0  144.92   77.00 
  10  -2   0  191.01  135.43 
  10  -2   0   72.59  147.81 
 -10  -2   0  461.28  201.47 
 -10  -2   0   63.19   86.53 
 -10  -2   0   76.36   69.46 
  10   2   1  826.98  211.69 
 -10   2  -1  756.40  132.55 
 -10   2  -1  748.44  122.29 
 -10   2  -1  717.61  149.11 
  10  -2   1  835.94  196.07 
  10  -2   1  643.07  164.08 
 -10  -2  -1  585.28  119.93 
 -10  -2  -1  791.61  117.25 
 -10   2  -2  288.59  129.80 
 -10   2  -2  170.49   83.87 
 -10   2  -2  114.65   95.71 
  10  -2   2  327.46  114.61 
 -10  -2  -2  103.15   81.65 
 -10  -2  -2  238.50   89.86 
 -10   2  -3  605.20  121.38 
 -10   2  -3  410.34  127.48 
 -10   2  -3  601.97  148.51 
 -10  -2  -3  546.61  121.78 
  10  -2   3  528.44  133.09 
 -10   2  -4  -45.17   84.79 
 -10   2  -4   40.24   85.24 
 -10   2  -4 -103.96   98.43 
 -10  -2  -4    9.94   83.38 
  10  -2   4  224.04  104.46 
 -10   2  -5 1898.89  226.46 
 -10   2  -5 1782.80  238.31 
 -10  -2  -5 2169.12  233.08 
 -10   3   6   53.59   83.76 
  10   3  -6   82.07  211.63 
  10   3  -6 -116.98  153.15 
 -10  -3   6   43.98  344.35 
  10  -3  -6  -54.08  148.63 
 -10  -3   6  160.77   88.31 
  10  -3  -6  -92.90  161.93 
  10   3  -5  281.46  218.39 
  10   3  -5   78.91  194.16 
 -10   3   5  145.00   82.91 
 -10  -3   5  639.71  363.72 
  10  -3  -5  303.21  162.17 
 -10  -3   5  235.01   99.72 
  10  -3  -5  116.70  170.32 
 -10   3   4  305.24  145.55 
  10   3  -4   67.45  156.09 
  10   3  -4  142.63  184.26 
 -10   3   4  155.00   89.82 
 -10  -3   4  723.55  332.50 
 -10  -3   4  150.28   92.90 
  10  -3  -4 -124.67  143.89 
  10  -3  -4  257.42  165.17 
  10   3  -3  859.43  237.30 
 -10   3   3  942.56  185.57 
  10   3  -3  818.16  229.49 
 -10   3   3  862.99  127.26 
 -10  -3   3 1031.24  142.42 
 -10  -3   3 1744.71  411.91 
  10  -3  -3 1001.87  205.07 
  10  -3  -3 1050.49  241.62 
  10   3  -2  -20.62  127.95 
  10   3  -2   29.55  129.49 
 -10   3   2  252.79   87.57 
 -10   3   2  269.29  136.04 
  10  -3  -2  173.88  124.51 
  10  -3  -2  113.33  177.90 
 -10  -3   2  124.62   86.16 
 -10  -3   2   44.94   89.23 
 -10  -3   2  475.70  289.01 
  10   3  -1  -70.69  113.30 
 -10   3   1    8.33   71.06 
 -10   3   1 -101.51  118.93 
  10  -3  -1   20.03  100.77 
 -10  -3   1  233.84  256.17 
 -10  -3   1  -45.78   70.88 
  10  -3  -1  -82.08  141.91 
 -10  -3   1 -100.17   71.19 
 -10   3   0 1133.04  144.42 
  10   3   0 1209.17  220.83 
 -10   3   0 1021.10  174.60 
 -10  -3   0 2209.86  427.61 
 -10  -3   0  963.25  144.95 
  10  -3   0 1138.24  229.77 
  10  -3   0 1355.65  229.26 
 -10  -3   0 1129.61  140.35 
 -10   3  -1  214.12  130.43 
 -10   3  -1  434.67  103.92 
  10   3   1  404.25  164.74 
 -10   3  -1  396.13  124.41 
  10  -3   1  451.75  162.50 
 -10  -3  -1  495.26  115.14 
 -10  -3  -1  414.82  101.41 
  10  -3   1  551.10  172.26 
 -10   3  -2   39.65   78.12 
 -10   3  -2   59.45  101.60 
 -10   3  -2   78.50  127.95 
 -10  -3  -2  227.88  107.82 
 -10  -3  -2   97.33   76.15 
  10  -3   2  226.52  128.35 
 -10   3  -3  262.46  131.67 
 -10   3  -3  457.21  113.30 
 -10   3  -3  394.85  135.62 
 -10  -3  -3  492.41  124.65 
  10  -3   3  665.17  166.61 
  10  -3   3  307.31  116.95 
 -10   3  -4  123.08  126.61 
 -10   3  -4  370.70  143.18 
 -10   3  -4  289.68  109.84 
 -10  -3  -4  145.49   92.86 
  10  -3   4   95.83  104.88 
  10  -3   4  322.96  134.15 
 -10   3  -5   -2.25  129.33 
 -10   3  -5 -176.83  113.90 
 -10   3  -5  -72.83   84.98 
 -10  -3  -5  -33.38   86.61 
  10   4  -5   95.31  196.57 
 -10   4   5  505.86  113.62 
  10   4  -5  914.12  258.17 
  10  -4  -5  205.47  194.93 
 -10  -4   5 1449.65  486.26 
 -10  -4   5  596.49  141.48 
  10  -4  -5  607.97  184.93 
 -10   4   4  277.37  117.50 
  10   4  -4  253.92  193.68 
  10   4  -4   71.75  185.21 
 -10   4   4  -57.08   78.68 
  10  -4  -4  -25.87  115.78 
 -10  -4   4    9.61   89.01 
  10  -4  -4  -15.82  183.56 
 -10  -4   4  442.03  353.64 
 -10   4   3  188.69   93.10 
 -10   4   3  263.17  148.04 
  10   4  -3   47.94  182.30 
  10   4  -3  326.64  172.56 
  10  -4  -3   73.99  165.14 
 -10  -4   3  719.84  373.85 
 -10  -4   3  213.30   96.35 
  10  -4  -3  282.00  140.80 
 -10   4   2  630.24  175.26 
  10   4  -2 1054.47  202.33 
 -10   4   2  540.25  122.58 
  10   4  -2  869.94  242.04 
  10  -4  -2  731.04  168.96 
 -10  -4   2 1716.37  465.47 
  10  -4  -2  726.63  223.36 
 -10  -4   2  702.24  122.66 
 -10  -4   2  546.45  135.51 
 -10   4   1  700.88  171.08 
  10   4  -1 1209.19  205.90 
 -10   4   1  830.32  139.74 
  10  -4  -1  976.37  220.81 
 -10  -4   1  699.76  128.53 
  10  -4  -1 1169.99  207.72 
 -10  -4   1  968.52  161.01 
 -10  -4   1 1817.20  500.90 
 -10   4   0  403.74  164.53 
 -10   4   0  208.19   99.85 
  10   4   0  559.36  178.53 
  10  -4   0  397.74  151.41 
 -10  -4   0  315.93   98.04 
  10  -4   0  706.80  199.43 
 -10  -4   0  225.71  102.55 
 -10  -4   0 1179.70  442.66 
 -10   4  -1   37.65   85.67 
 -10   4  -1  129.19  136.42 
 -10  -4  -1 1144.13  440.88 
 -10  -4  -1  -23.25   72.84 
  10  -4   1  238.54  153.00 
 -10  -4  -1   99.72   84.10 
 -10   4  -2  151.00  150.79 
 -10   4  -2  250.56  104.11 
 -10   4  -2  225.01  140.95 
 -10  -4  -2  246.71  107.54 
  10  -4   2  482.11  171.91 
 -10   4  -3   92.74  132.35 
 -10   4  -3  360.48  108.16 
 -10   4  -3  113.52  147.28 
  10  -4   3   65.23   97.99 
  10  -4   3  408.11  143.61 
 -10  -4  -3  100.27   91.82 
 -10   4  -4 -134.70  130.80 
 -10   4  -4  128.40   95.73 
 -10   4  -4   49.08  141.77 
  10  -4   4  -54.06   88.51 
  10  -4   4  211.96  131.78 
 -10  -4  -4    5.74   94.73 
  10  -5  -4  406.10  218.77 
 -10  -5   4  586.79  141.60 
  10  -5  -4  674.77  171.80 
 -10   5   3  402.87  148.12 
  10   5  -3  184.74  182.71 
 -10   5   3   86.27   97.05 
  10  -5  -3   26.48  182.57 
 -10  -5   3 1083.10  510.83 
  10  -5  -3  461.60  156.61 
 -10  -5   3   12.94   84.21 
 -10   5   2  133.30   92.52 
 -10   5   2   11.18  122.63 
  10   5  -2  285.10  201.91 
  10  -5  -2   65.66  114.81 
 -10  -5   2  705.49  482.70 
 -10  -5   2    9.03   88.84 
  10  -5  -2  -56.62  157.66 
 -10   5   1  230.54  154.18 
 -10   5   1  416.76  113.54 
  10  -5  -1  131.60  149.46 
 -10  -5   1  294.12  124.17 
 -10  -5   1  318.96  108.98 
  10  -5  -1  137.69  119.65 
 -10  -5   1 1330.26  535.49 
 -10   5   0 -149.89  119.77 
 -10   5   0    7.79   80.60 
 -10  -5   0   92.78  105.04 
  10  -5   0  -91.74  128.88 
  10  -5   0  -70.40   99.98 
 -10  -5   0 -117.79   71.24 
 -10  -5   0  637.55  559.10 
 -10   5  -1  -18.02   93.01 
 -10   5  -1   88.90  136.48 
 -10  -5  -1  -33.67   86.46 
  10  -5   1  333.18  160.71 
 -10  -5  -1   48.07  105.07 
 -10  -5  -1  543.62  562.75 
 -10   5  -2  581.17  142.54 
 -10   5  -2  647.12  181.50 
  10  -5   2  692.50  153.51 
 -10  -5  -2  956.89  175.79 
  10  -5   2 1043.67  219.43 
 -10  -5  -2 1516.93  676.73 
  11   0  -6 1249.54  299.08 
 -11   0   6  633.02  115.89 
  11   0  -5   -9.03  120.80 
  11   0  -5  146.54  186.48 
 -11   0   5   -0.49   66.45 
 -11   0   4  110.16   80.96 
  11   0  -4  321.86  195.18 
  11   0  -3  -11.91  167.78 
 -11   0   3  -20.07   71.90 
 -11   0   2  284.80  134.38 
  11   0  -2  728.52  196.40 
 -11   0   2  311.86   90.24 
  11   0  -1   23.11  135.02 
 -11   0   1    9.58  110.99 
 -11   0   1    7.37   67.70 
 -11   0   0   97.40   73.02 
  11   0   0   86.63  129.88 
 -11   0   0  -14.15   63.76 
 -11   0   0  -61.19   96.73 
 -11   0  -1  -12.98   56.50 
 -11   0  -1 -154.65   83.30 
  11   0   1  -22.78  133.67 
 -11   0  -1   24.14   77.25 
 -11   0  -2  209.91   87.81 
 -11   0  -2  267.89  118.21 
 -11   0  -2  242.10  105.57 
 -11   0  -3    3.50  100.34 
 -11   0  -3   31.60   90.56 
 -11   0  -3   27.28   84.09 
 -11   0  -4  256.61  123.08 
 -11   0  -4  339.85  125.96 
 -11   1   5   38.85   72.41 
  11   1  -5 -155.27  119.40 
  11   1  -5   96.82  194.37 
 -11  -1   5  110.72   86.24 
  11  -1  -5  -39.86  157.24 
  11  -1  -5 -201.28  197.27 
 -11  -1   5   46.71  268.66 
  11   1  -4  -22.87  124.36 
  11   1  -4  181.76  182.71 
 -11   1   4   63.91   73.27 
  11  -1  -4   43.96  273.14 
 -11  -1   4 -102.29   68.28 
 -11  -1   4  109.76  242.04 
  11  -1  -4   76.81  167.34 
 -11   1   3   26.54   71.88 
 -11   1   3 -155.39  166.15 
  11   1  -3  113.56  177.40 
 -11  -1   3  140.68  211.92 
 -11  -1   3  -65.29   70.03 
  11  -1  -3 -110.26  130.76 
 -11   1   2  800.42  126.10 
 -11   1   2  999.64  179.51 
  11   1  -2  873.66  235.81 
  11  -1  -2  892.82  205.80 
 -11  -1   2  745.70  150.40 
 -11  -1   2  681.27  120.30 
 -11  -1   2 1433.10  332.37 
 -11   1   1  -45.69   61.50 
  11   1  -1  -24.58  133.07 
 -11   1   1   45.84  123.77 
  11  -1  -1   67.21  129.16 
 -11  -1   1  102.19   77.56 
 -11  -1   1   34.99  108.60 
 -11   1   0  -80.90   54.11 
 -11   1   0   46.43  112.29 
  11   1   0  290.61  167.84 
  11  -1   0  196.32  143.76 
 -11  -1   0  -14.07   88.43 
 -11  -1   0   95.13   80.01 
 -11   1  -1  725.39  138.76 
 -11   1  -1  541.21  146.96 
 -11   1  -1  693.52  123.22 
  11   1   1  421.68  188.49 
 -11  -1  -1  671.49  140.18 
  11  -1   1  457.39  180.73 
 -11  -1  -1  760.40  126.82 
 -11   1  -2  -10.29   87.82 
 -11   1  -2   10.11  103.99 
 -11   1  -2   43.54   76.13 
 -11  -1  -2   15.13   71.43 
 -11  -1  -2   95.29  103.38 
 -11   1  -3   61.11  117.03 
 -11   1  -3  137.74   93.44 
 -11   1  -3   53.24  107.12 
 -11  -1  -3  232.69  118.78 
 -11  -1  -3  191.02  101.58 
 -11   1  -4  115.51  108.40 
 -11   1  -4   65.78  123.36 
 -11  -1  -4   36.97   96.94 
 -11  -1  -4  -44.20   98.97 
  11   2  -5 1573.75  337.38 
  11   2  -5 1039.16  277.50 
 -11   2   5  900.53  137.65 
 -11  -2   5 1714.77  401.29 
  11  -2  -5 1115.76  248.13 
 -11  -2   5  921.04  143.54 
  11  -2  -5  505.95  240.37 
  11   2  -4  280.15  167.61 
 -11   2   4  234.89   89.91 
  11   2  -4   17.52  168.25 
 -11  -2   4  339.52  108.27 
  11  -2  -4 -258.88  188.53 
  11  -2  -4  218.24  161.84 
 -11  -2   4  531.43  298.28 
 -11   2   3  464.50  175.45 
 -11   2   3  623.34  121.18 
  11   2  -3  723.28  245.80 
 -11  -2   3  440.88  116.38 
  11  -2  -3  506.23  243.36 
 -11  -2   3  899.11  340.69 
  11  -2  -3  691.91  189.49 
 -11   2   2   28.50  153.67 
  11   2  -2   93.60  145.88 
 -11   2   2    0.86   70.93 
 -11  -2   2   47.83   78.09 
  11  -2  -2  130.48  134.55 
 -11  -2   2  345.41  255.68 
  11  -2  -2 -250.20  156.01 
 -11  -2   2 -158.40   85.70 
 -11   2   1   85.28  142.28 
  11   2  -1  501.57  192.78 
 -11   2   1  116.53   84.12 
 -11  -2   1    0.70   70.76 
  11  -2  -1   96.14  132.17 
 -11  -2   1   -4.20   98.64 
  11  -2  -1  175.56  179.80 
 -11  -2   1  680.49  260.39 
  11   2   0  221.82  164.43 
 -11   2   0  129.46  121.07 
 -11   2   0  -49.12   73.53 
 -11  -2   0  105.55   82.92 
 -11  -2   0   16.42  103.38 
  11  -2   0  332.90  145.44 
  11  -2   0  114.94  139.52 
 -11   2  -1  259.41  142.49 
 -11   2  -1  296.05  103.06 
  11   2   1  380.51  171.73 
  11  -2   1  398.98  171.80 
 -11  -2  -1  295.20  122.94 
 -11  -2  -1  359.79  101.89 
  11  -2   1  568.53  170.51 
 -11   2  -2   77.52  132.14 
 -11   2  -2  121.95  110.74 
 -11   2  -2  257.28   98.94 
 -11  -2  -2  -10.44   72.46 
 -11  -2  -2   40.85  101.48 
 -11   2  -3  134.15  114.29 
 -11   2  -3 -167.24  114.25 
 -11   2  -3  -19.96   78.94 
 -11  -2  -3  158.89  115.52 
  11  -2   3  -30.82  101.63 
  11   3  -4  175.44  206.21 
  11   3  -4  240.47  181.83 
 -11   3   4  -19.10   81.25 
 -11  -3   4  396.35  352.89 
 -11  -3   4  -38.67   75.72 
  11  -3  -4 -216.41  183.89 
  11  -3  -4  138.26  146.10 
  11   3  -3  116.97  178.64 
  11   3  -3   69.74  180.79 
 -11   3   3  201.86   92.86 
 -11   3   3   99.73  149.98 
  11  -3  -3   12.83  122.27 
 -11  -3   3   57.96   78.44 
  11  -3  -3   45.03  179.52 
 -11  -3   3  527.46  338.38 
 -11   3   2  364.21  163.76 
 -11   3   2  475.61  113.23 
  11   3  -2  308.96  160.67 
  11  -3  -2  204.77  140.70 
 -11  -3   2  233.18   95.97 
  11  -3  -2  207.15  205.72 
 -11   3   1  236.55  103.10 
  11   3  -1  219.57  142.82 
 -11   3   1  184.58  154.55 
  11  -3  -1  159.66  143.32 
 -11  -3   1   89.87   86.02 
 -11  -3   1  178.38  118.59 
 -11  -3   1  867.08  318.21 
  11  -3  -1  220.32  174.12 
  11   3   0   78.10  135.06 
 -11   3   0 -171.91  124.95 
 -11   3   0    0.99   81.28 
 -11  -3   0  -34.89   85.89 
 -11  -3   0 -122.90   61.84 
  11  -3   0   53.30  125.23 
  11  -3   0  119.41  156.66 
  11   3   1  640.12  196.84 
 -11   3  -1  312.57  156.13 
 -11   3  -1  500.49  120.25 
  11  -3   1  671.64  184.39 
  11  -3   1  432.36  170.54 
 -11  -3  -1   45.85   91.01 
 -11  -3  -1  466.70  114.71 
 -11   3  -2   34.93  135.94 
 -11   3  -2  -64.43  119.36 
 -11   3  -2   77.44   88.61 
  11  -3   2  412.15  141.57 
 -11  -3  -2  142.29  100.52 
 -11   4   2  173.18  154.03 
 -11   4   2  109.87   93.29 
  11   4  -2  450.37  229.43 
  11  -4  -2  241.25  142.02 
 -11  -4   2  361.81  124.02 
  11  -4  -2  181.46  193.65 
 -11  -4   2 1452.83  418.46 
 -11   4   1   40.34  140.39 
 -11   4   1  -70.10   80.90 
 -11  -4   1 -116.54  104.98 
 -11  -4   1  -87.79   79.37 
  11  -4  -1   54.90  131.03 
  11  -4  -1  -80.23  149.78 
 -11   4   0  -59.79  141.00 
 -11   4   0   -2.85   86.38 
  11  -4   0   41.23  134.12 
 -11  -4   0  136.31   96.84 
 -11  -4   0   -4.83  104.16 
  11  -4   0   98.81  143.13 
 -11   4  -1   63.03   85.34 
 -11   4  -1  118.09  156.10 
 -11  -4  -1  169.72   97.01 
  11  -4   1  284.43  158.89 
 -11  -4  -1  -58.69   89.99 
  12   0  -3   60.68  157.82 
 -12   0   3  -33.26   74.15 
 -12   0   2  116.15   91.50 
  12   0  -2  110.25  182.09 
 -12   0   2   86.69  156.06 
 -12   0   1 -260.06  116.59 
 -12   0   1  -41.12   65.63 
  12   0  -1  -31.36  146.83 
 -12   0   0  113.49   81.86 
 -12   0   0   33.31  139.12 
  12   0   0  137.19  157.76 
 -12   0  -1   42.42   76.33 
 -12   0  -1 -254.43  104.01 
 -12   0  -1   19.18  142.28 
  12   0   1  161.71  165.13 
  12   1  -3  -84.45  156.96 
  12  -1  -3  164.16  158.13 
  12   1  -2   93.07  173.45 
 -12   1   2 -131.08  154.55 
 -12   1   2   -8.28   72.64 
 -12  -1   2  119.82   97.25 
  12  -1  -2  -26.53  131.25 
 -12   1   1  154.68  100.12 
 -12   1   1  -54.53  142.45 
  12   1  -1   -9.11  151.62 
  12  -1  -1  154.78  158.54 
 -12  -1   1  197.95   99.95 
 -12  -1   1  -92.81  123.09 
  12   1   0  114.55  166.61 
 -12   1   0  119.76  143.59 
 -12   1   0  -10.28   81.95 
 -12  -1   0  180.68   92.91 
 -12  -1   0  -56.86  122.86 
  12  -1   0   85.00  153.88 
 -12   1  -1   55.97  132.93 
 -12   1  -1   36.46   83.25 
  12   1   1  168.62  189.04 
 -12  -1  -1   93.28  119.67 
 -12  -1  -1   96.60   84.29 
 -12  -1  -1   95.33   94.78 
  12  -1   1  271.28  177.44 
   0   0   0    0.00    0.00 
; 
_shelx_hkl_checksum   80378 
  
